# Supplementary material for: Characteristics, origin, and potential for cancer diagnostics of ultrashort plasma cell-free DNA
Source: HighWire-hosted journal article supplement (doi:10.1101/gr.275691.121), 2021-12-20
Supplement: Supplemental_Material_Clean2.docx [file Supplemental_Material_Clean2.docx]

**Supplemental Material**

**Characteristics, origin, and potential for cancer diagnostics of ultrashort plasma cell-free DNA**

Irena Hudecova, Christopher G. Smith, Robert Hänsel-Hertsch, Chandra S. Chilamakuri, James A. Morris, Aadhitthya Vijayaraghavan, Katrin Heider, Dineika Chandrananda, Wendy N. Cooper, Davina Gale, Javier Garcia-Corbacho, Simon Pacey, Richard D. Baird, Nitzan Rosenfeld and Florent Mouliere

**Table of Contents:**

**Supplemental Methods**

**Supplemental Figures**

| **Supplemental Figure S1.** | Recovery of cfDNA fragments by different DNA extraction and DNA library preparation protocols. |
| --- | --- |
| **Supplemental Figure S2.** | Recovery of cfDNA fragments by alternative ssDNA library preparation protocols. |
| **Supplemental Figure S3.** | The impact of sequence artefact removal from MB-ssDNA data in healthy individuals and cancer patients. |
| **Supplemental Figure S4.** | DNA fragment size analysis of plasma samples processed by different DNA extraction and DNA library preparation protocols. |
| **Supplemental Figure S5.** | DNA size profiles of plasma samples processed by four different protocols in a cohort of 12 patients with advanced cancer. |
| **Supplemental Figure S6.** | ctDNA fractions in MB-ssDNA libraries at specific and all DNA fragment lengths. |
| **Supplemental Figure S7.** | Recovery of plasma ssDNA molecules by excluding the denaturation step of the ssDNA-based protocol. |
| **Supplemental Figure S8.** | Assessment of cfDNA coverage at TSS in MB-dsDNA and MB-ssDNA libraries. |
| **Supplemental Figure S9.** | Assessment of the relative coverage of US cfDNA fragments at TSS in MB-ssDNA libraries. |
| **Supplemental Figure S10.** | Relative coverage of US cfDNA fragments at cell type-specific TSS in MB-ssDNA libraries. |
| **Supplemental Figure S11.** | Fold enrichment of US cfDNA fragments at cell type-specific TSS in MB-ssDNA libraries. |
| **Supplemental Figure S12.** | Assessment of GC content and cfDNA fold enrichment in accessible, blood-related, chromatin regions within gene promoters that contain or lack a G-quadruplex (G4) signature. |

**Supplemental Tables**

| **Supplemental Table S1.** | Summary Table. |
| --- | --- |
| **Supplemental Table S2.** | List of all TSS regions. |
| **Supplemental Table S3.** | List of cell-specific TSS regions. |

**Supplemental Codes**

| **Supplemental Code 1.** | Relative coverage TSS analysis scripts. |
| --- | --- |
| **Supplemental Code 2.** | Fold enrichment analysis scripts. |

**Supplemental Methods**

**Sequencing data processing.** Paired-end sequencing reads were aligned to the human reference genome (GRCh37/hg19) using BWA-MEM followed by the removal of adapters. PCR and optical duplicates were marked using *MarkDuplicates* (Picard, http://broadinstitute.github.io/picard/) and excluded from downstream analysis along with sequencing reads with low mapping quality. Reads have been aligned using GRCh37 due to the compatibility of downstream software. A comparison of alignment rates of plasma cfDNA sWGS data, between GRCh37 and GRCh38 revealed similarly high alignment values (99.46% vs 99.57% respectively). There was also no significant difference in the cfDNA fragment size distributions (Kolmogorov–Smirnov test, D = 0.04, p = 0.412). Insert size metrics for each sample were determined using *InsertSizeMetrics* (Picard). To assess GC content, the nucleotide frequency was calculated by *nchar* function in R (R Core Team 2018). Significant differences were calculated by Wilcoxon rank-sum test.

**Poly(A/T) sequence bias removal.** In MB-ssDNA data (Supplemental Fig. S3A), potential sequence artefacts in poly(A/T) regions were excluded (Vardi et al. 2017; Zhao and Zheng 2018) (Supplemental Fig. S3B). In Supplemental Figure S3C, data was filtered using blacklisted poly(A/T) sites identified in the genome (Supplemental Fig. S3C). Genome-wide poly(A) and poly(T) regions with at least seven bases were identified and extended to 200-bp intervals. Sequencing reads within these intervals were excluded from analysis.

**Similarity of predicted (PQS/OQS) G4-forming chromatin accessibility in transcription start sites with G4 regions identified in chromatin.** To generate the “in situ” G4 regions, we assembled them from G4-ChIP-seq data that were acquired of a) tumors from patient-derived breast cancer xenograft models and b) of cell lines. We consider a) as in vivo and b) as in cellulo derived G4 regions, which we collectively define as “in situ”. To assess whether accessible chromatin regions in TSS contain PQS/OQS that also adopt G4 secondary structure *in situ*, we first assembled (*cat*, *sortBed*, *mergeBed*) various annotated G4 regions (*in situ* G4Rs), which were mapped by G4-ChIP-seq using BG4 (GSE145090, GSE99205, GSE152216) or G4P (GSE133379). Second, BEDTools *intersect* was used to retrieve ~81,000 PQS that overlap with *in situ* G4Rs (PQS/*in situ*.G4Rs). Third, BEDTools *intersect* was used to retrieve accessible chromatin regions in TSS that are positive for PQS/*in situ*.G4Rs. Fourth, we used *intervene venn* to assess the similarity between accessible regions in TSS that are either a) positive or b) negative for PQS/OQS, and c) positive for PQS/*in situ*.G4Rs. Code used for this analysis is available in Supplemental Code 2.

**Supplemental Figure S1.** Recovery of cfDNA fragments by different DNA extraction and DNA library preparation protocols.Heatmap showing a median distribution of plasma DNA fragments inferred from paired-end sWGS analysis in healthy individuals and cancer patients using SC and MB protocol combined with ssDNA and dsDNA library preparations. Cancer patients were classified as low and high SCNA based on their t-MAD scores (inferred from a standard MB-dsDNA protocol).

**Supplemental Figure S2**. Recovery of cfDNA fragments by alternative ssDNA library preparation protocols. (*A*) Plasma DNA size profile in samples extracted by MB protocol followed by an alternative ssDNA library preparation protocol using ligation of biotinylated adapters (Gansauge and Meyer, 2013). The trends in plasma DNA size profile are shown for samples from 3 cancer patients and one healthy individual processed in parallel by both dsDNA and ssDNA library preparation method. (*B*) Plasma DNA size profile in samples from 3 cancer patients analysed by two distinct ssDNA library preparation protocols: i) Gansauge and Meyer, 2013 and ii) MB-ssDNA protocol.

**Supplemental Figure S3.** The impact of sequence artefact removal from MB-ssDNA data in healthy individuals and cancer patients.(*A*) Plasma DNA size profiles of MB-ssDNA libraries with no additional filtering. (*B*)Plasma DNA size profiles of MB-ssDNA libraries processed by the SMARTcleaner tool (Zhao and Zheng, 2018).(*C*) Plasma DNA size profiles of MB-ssDNA libraries with *in silico* filtering of poly(A/T) regions.

**Supplemental Figure S4.** DNA fragment size analysis of plasma samples processed by different DNA extraction and DNA library preparation protocols.(*A,B*)Plasma DNA size profile in samples from cancer patients extracted by (*A*) SC and (*B*) MB protocols, followed by ssDNA and dsDNA library preparation. The vertical dashed line indicates a DNA fragment size of 70 bp. (*C*) Proportion of cfDNA fragments shorter than 70 bp derived from SC-ssDNA and SC-dsDNA libraries in samples from healthy individuals and cancer patients with low and high SCNA levels. (*D*)Proportion of cfDNA fragments shorter than 70 bp derived from MB-ssDNA and MB-dsDNA libraries in samples from healthy individuals and samples from cancer patients with low and high SCNA levels. Wilcoxon rank-sum test: (**), P < 0.01; (***), P < 0.001; (****), P < 0.0001; (ns), non-significant.

**Supplemental Figure S5.** DNA size profiles of plasma samples processed by four different protocols in a cohort of 12 patients with advanced cancer. In MB-ssDNA libraries, the density of the 50 bp peak is higher in samples from cancer patients with low SCNA levels (light blue) compared to samples from cancer patients with high SCNA levels (dark blue). The vertical dashed line indicates a DNA fragment size of 70 bp.

**Supplemental Figure S6.** ctDNA fractions in MB-ssDNA libraries at specific and all DNA fragment lengths. Assessment of tumor fractions using t-MAD scores in plasma DNA samples with high SCNA content processed using both *in vitro* and *in silico* size selection of fragments in size range of 30−70 bp in 3 cancer patients. The t-MAD scores for the whole range of cfDNA fragment lengths are shown for comparison.

**Supplemental Figure S7.** Recovery of plasma ssDNA molecules by excluding the denaturation step of the ssDNA-based protocol.(*A,B*) Plasma DNA size profiles inferred from sWGS of MB-ssDNA libraries in samples from (*A*) healthy individuals and (*B*)cancer patients using an altered ssDNA protocol in which the initial denaturation step was omitted (solid line, non-denatured, ND) and in which the DNA denaturation step was retained (dashed line, denatured, D).(*C*)t-MAD scores in samples processed by the altered MB-ssDNA protocol (non-denatured, ND) confirmed similar ctDNA levels compared to MB-ssDNA libraries with a DNA denaturation step included (denatured, D) across all fragment size ranges. All samples were down-sampled to the same number of reads (0.5 M).

**Supplemental Figure S8.** Assessment of cfDNA coverage at TSS in MB-dsDNA and MB-ssDNA libraries. (*A*) cfDNA coverage at TSS in a pool of MB-dsDNA sWGS data of samples from healthy individuals in different size ranges (30−70 bp, 100−150 bp and 150−1000 bp). (*B*) The relative coverage of US cfDNA fragments nearTSS in individual samples from healthy individuals and cancer patients (the entire spread of the data). (*C*) cfDNA coverage of US fragments (30−70 bp) at TSS in MB-ssDNA libraries for selected samples from healthy individuals and cancer patients processed within the same batch of blood processing, DNA extraction and DNA library preparation.

**Supplemental Figure S9.** Assessment of the relative coverage of US cfDNA fragments at TSS in MB-ssDNA libraries. (*A,B*) The relative coverage of US cfDNA fragments (*A*) at the position 160 bp and (*B*) at the position 250 bp upstream from TSS. (*C,D*) ROC curve analysis on the use of the relative density (*C*) at the position 160 bp and (*D*) at the position 250 bp upstream from TSS for discriminating cancer patients from the healthy individuals. Wilcoxon rank-sum test: (**), P < 0.01; (***), P < 0.001; (****), P < 0.0001. (*E*) Unsupervised clustering analysis (t-SNE) combining the density of US cfDNA fragments at the position 40 bp, 160 bp, 250 bp upstream from TSS.

**Supplemental Figure S10.** Relative coverage of US cfDNA fragments at cell type-specific TSS in MB-ssDNA libraries. (*A*) Relative coverage of US cfDNA fragments in MB-ssDNA libraries at TSS associated with accessible chromatin regions of different haematopoietic cells (erythrocyte progenitors and lymphocytes), or in TSS associated with accessible pan-cancer chromatin regions, in samples from healthy individuals (CTL) and cancer patients (Low/High SCNA). (*B*) Shown are the same data as in (*A*), but faceted by cohort. Dashed lines indicate distance from TSS = 0 bp, as well as 40 bp, 160 bp, and 250 bp.

**Supplemental Figure S11.** Fold enrichment of US cfDNA fragments at cell type-specific TSS in MB-ssDNA libraries. (*A*) Fold enrichment of US cfDNA fragments in MB-ssDNA libraries at TSS associated with accessible chromatin regions of different haematopoietic cells (erythrocyte progenitors and lymphocytes), or in TSS associated with accessible pan-cancer chromatin regions, in samples from healthy individuals (CTL) and cancer patients (Low/High SCNA). (*B*) Shown are the same data as in (*A*), but faceted by cohort. (*C*) Differences in fold enrichment of US cfDNA fragments at TSS associated with accessible chromatin regions of erythrocyte progenitors vs. accessible pan-cancer chromatin regions, in MB-ssDNA libraries from healthy individuals and cancer patients. (*D*) Differences in fold enrichment of US cfDNA fragments at TSS associated with accessible chromatin regions of lymphocytes vs. accessible pan-cancer chromatin regions, in MB-ssDNA libraries from healthy individuals and cancer patients.

**Supplemental Figure S12.** Assessment of GC content and cfDNA fold enrichment in accessible, blood-related, chromatin regions within gene promoters that contain or lack a G-quadruplex (G4) signature. (*A,B*) MB-ssDNA libraries were assessed for GC content (*A*) in samples from healthy individuals and cancer patients and (*B*) in all samples at three different DNA fragment size ranges (30−70 bp, 100−150 bp and 150−1000 bp). (*C,D*) MB-ssDNA libraries were assessed for cfDNA fold enrichment in accessible, blood-related, chromatin regions within gene promoters that (*C*) contain or (*D*) lack a G4 signature at three different DNA fragment size ranges. (*E*) Comparison of cfDNA fold enrichment between G4-positive and G4-negative accessible chromatin regions within gene promoters at three different DNA fragment size ranges. Wilcoxon rank-sum test: (*), P < 0.05; (**), P < 0.01; (***), P < 0.001; (****), P < 0.0001; (ns), non-significant. (*F*) Overlap of accessible regions in TSS that are either positive (blue) or negative (purple) for PQS/OQS, with accessible regions in TSS that are positive for PQS and can adopt G4 secondary structure *in situ* (yellow).

**References**

R Core Team. 2018. R: a language and environment for statistical computing. R Foundation for

Statistical Computing, Vienna. https://www.R-project.org/.

Vardi O, Shamir I, Javasky E, Goren A, Simon I. 2017. Biases in the SMART-DNA library preparation

method associated with genomic poly dA/dT Sequences. *PLoS One* **12**: e0172769.

doi:10.1371/journal.pone.0172769

Zhao D, Zheng D. 2018. SMARTcleaner: identify and clean off-target signals in SMART ChIP-seq

analysis. *BMC Bioinformatics* **19**: 544. doi:10.1186/s12859-018-2577-4

Gansauge M-T, Meyer M. 2013. Single-stranded DNA library preparation for the sequencing of

ancient or damaged DNA. *Nat Protoc* **8**: 737–748. doi:10.1038/nprot.2013.038
