# Supplementary material for: Characteristics, origin, and potential for cancer diagnostics of ultrashort plasma cell-free DNA
Source: HighWire-hosted journal article supplement (doi:10.1101/gr.275691.121), 2021-12-20
Supplement: Supplemental_Table_S2.xlsx [file Supplemental_Table_S2.xlsx]

## Sheet: Supplemental_Table_S2
Supplemental_Table_S2: List of all TSS regions.
#chrom: chromosome
#start: start position
#end: end position
#strand: positive or negative
#gene_biotype: protein coding or polymorphic pseudogene
#gene_id: gene ID
#gene_name: gene name
#transcript_id: transcript ID
chrom	start	end	strand	gene_biotype	gene_id	gene_name	transcript_id
1	69091	70008	+	protein_coding	ENSG00000186092	OR4F5	ENST00000335137
1	137621	139379	-	protein_coding	ENSG00000237683	AL627309.1	ENST00000423372
1	367640	368634	+	protein_coding	ENSG00000235249	OR4F29	ENST00000426406
1	621059	622053	-	protein_coding	ENSG00000185097	OR4F16	ENST00000332831
1	739121	739137	-	protein_coding	ENSG00000269831	AL669831.1	ENST00000599533
1	818043	818058	+	protein_coding	ENSG00000269308	AL645608.2	ENST00000594233
1	860260	860328	+	protein_coding	ENSG00000187634	SAMD11	ENST00000420190
1	860530	860569	+	protein_coding	ENSG00000187634	SAMD11	ENST00000437963
1	861118	861180	+	protein_coding	ENSG00000187634	SAMD11	ENST00000342066
1	865692	865716	+	protein_coding	ENSG00000187634	SAMD11	ENST00000341065
1	874655	874840	+	protein_coding	ENSG00000187634	SAMD11	ENST00000455979
1	866426	866445	-	protein_coding	ENSG00000268179	AL645608.1	ENST00000598827
1	894595	894670	-	protein_coding	ENSG00000188976	NOC2L	ENST00000327044
1	895967	896180	+	protein_coding	ENSG00000187961	KLHL17	ENST00000338591
1	901877	901994	+	protein_coding	ENSG00000187583	PLEKHN1	ENST00000379410
1	901882	901994	+	protein_coding	ENSG00000187583	PLEKHN1	ENST00000379409
1	901882	901994	+	protein_coding	ENSG00000187583	PLEKHN1	ENST00000379407
1	908892	909020	+	protein_coding	ENSG00000187583	PLEKHN1	ENST00000491024
1	917445	917497	-	protein_coding	ENSG00000187642	C1orf170	ENST00000433179
1	917445	917473	-	protein_coding	ENSG00000187642	C1orf170	ENST00000341290
1	935072	935552	-	protein_coding	ENSG00000188290	HES4	ENST00000428771
1	935246	935491	-	protein_coding	ENSG00000188290	HES4	ENST00000304952
1	935246	935361	-	protein_coding	ENSG00000188290	HES4	ENST00000484667
1	948803	948956	+	protein_coding	ENSG00000187608	ISG15	ENST00000379389
1	955503	955753	+	protein_coding	ENSG00000188157	AGRN	ENST00000379370
1	985936	985971	+	protein_coding	ENSG00000188157	AGRN	ENST00000419249
1	1009396	1009687	-	protein_coding	ENSG00000237330	RNF223	ENST00000453464
1	1051440	1051461	-	protein_coding	ENSG00000131591	C1orf159	ENST00000379339
1	1051440	1051736	-	protein_coding	ENSG00000131591	C1orf159	ENST00000448924
1	1051440	1051736	-	protein_coding	ENSG00000131591	C1orf159	ENST00000294576
1	1051440	1051478	-	protein_coding	ENSG00000131591	C1orf159	ENST00000421241
1	1026852	1027554	-	protein_coding	ENSG00000131591	C1orf159	ENST00000379320
1	1041336	1041507	-	protein_coding	ENSG00000131591	C1orf159	ENST00000379319
1	1051440	1051475	-	protein_coding	ENSG00000131591	C1orf159	ENST00000434641
1	1051440	1051736	-	protein_coding	ENSG00000131591	C1orf159	ENST00000437760
1	1051440	1051736	-	protein_coding	ENSG00000131591	C1orf159	ENST00000462097
1	1051440	1051741	-	protein_coding	ENSG00000131591	C1orf159	ENST00000475119
1	1027946	1028193	-	protein_coding	ENSG00000131591	C1orf159	ENST00000442117
1	1027946	1028193	-	protein_coding	ENSG00000131591	C1orf159	ENST00000427787
1	1051440	1051469	-	protein_coding	ENSG00000131591	C1orf159	ENST00000480643
1	1109283	1109306	+	protein_coding	ENSG00000162571	TTLL10	ENST00000379290
1	1109286	1109306	+	protein_coding	ENSG00000162571	TTLL10	ENST00000379289
1	1115077	1115233	+	protein_coding	ENSG00000162571	TTLL10	ENST00000379288
1	1141765	1141951	-	protein_coding	ENSG00000186891	TNFRSF18	ENST00000328596
1	1141765	1142071	-	protein_coding	ENSG00000186891	TNFRSF18	ENST00000379268
1	1140750	1141060	-	protein_coding	ENSG00000186891	TNFRSF18	ENST00000486728
1	1141765	1141951	-	protein_coding	ENSG00000186891	TNFRSF18	ENST00000379265
1	1149363	1149512	-	protein_coding	ENSG00000186827	TNFRSF4	ENST00000379236
1	1167272	1167381	-	protein_coding	ENSG00000078808	SDF4	ENST00000360001
1	1167272	1167411	-	protein_coding	ENSG00000078808	SDF4	ENST00000263741
1	1163848	1163976	-	protein_coding	ENSG00000078808	SDF4	ENST00000403997
1	1167272	1167370	-	protein_coding	ENSG00000078808	SDF4	ENST00000545427
1	1167629	1170421	+	protein_coding	ENSG00000176022	B3GALT6	ENST00000379198
1	1181894	1182102	-	protein_coding	ENSG00000184163	FAM132A	ENST00000330388
1	1209046	1209234	-	protein_coding	ENSG00000160087	UBE2J2	ENST00000347370
1	1209046	1209265	-	protein_coding	ENSG00000160087	UBE2J2	ENST00000349431
1	1201478	1201503	-	protein_coding	ENSG00000160087	UBE2J2	ENST00000339385
1	1209046	1209244	-	protein_coding	ENSG00000160087	UBE2J2	ENST00000348298
1	1209046	1209235	-	protein_coding	ENSG00000160087	UBE2J2	ENST00000400929
1	1208879	1209106	-	protein_coding	ENSG00000160087	UBE2J2	ENST00000360466
1	1209046	1209213	-	protein_coding	ENSG00000160087	UBE2J2	ENST00000400930
1	1208757	1209224	-	protein_coding	ENSG00000160087	UBE2J2	ENST00000435198
1	1209046	1209207	-	protein_coding	ENSG00000160087	UBE2J2	ENST00000509720
1	1208879	1209217	-	protein_coding	ENSG00000160087	UBE2J2	ENST00000422076
1	1209046	1209234	-	protein_coding	ENSG00000160087	UBE2J2	ENST00000502382
1	1208233	1208851	-	protein_coding	ENSG00000160087	UBE2J2	ENST00000488418
1	1215816	1216046	+	protein_coding	ENSG00000162572	SCNN1D	ENST00000379116
1	1215968	1216990	+	protein_coding	ENSG00000162572	SCNN1D	ENST00000338555
1	1217305	1217390	+	protein_coding	ENSG00000162572	SCNN1D	ENST00000470022
1	1217489	1217695	+	protein_coding	ENSG00000162572	SCNN1D	ENST00000325425
1	1217576	1217695	+	protein_coding	ENSG00000162572	SCNN1D	ENST00000400928
1	1222489	1222679	+	protein_coding	ENSG00000162572	SCNN1D	ENST00000379099
1	1243149	1243398	-	protein_coding	ENSG00000131584	ACAP3	ENST00000354700
1	1243149	1243269	-	protein_coding	ENSG00000131584	ACAP3	ENST00000353662
1	1243947	1244100	+	protein_coding	ENSG00000169972	PUSL1	ENST00000379031
1	1244201	1244352	+	protein_coding	ENSG00000169972	PUSL1	ENST00000467712
1	1259961	1260071	-	protein_coding	ENSG00000127054	CPSF3L	ENST00000435064
1	1259961	1260053	-	protein_coding	ENSG00000127054	CPSF3L	ENST00000411962
1	1259961	1260017	-	protein_coding	ENSG00000127054	CPSF3L	ENST00000421495
1	1259961	1260033	-	protein_coding	ENSG00000127054	CPSF3L	ENST00000419704
1	1259961	1259989	-	protein_coding	ENSG00000127054	CPSF3L	ENST00000540437
1	1259961	1260050	-	protein_coding	ENSG00000127054	CPSF3L	ENST00000450926
1	1259961	1260017	-	protein_coding	ENSG00000127054	CPSF3L	ENST00000545578
1	1259961	1260010	-	protein_coding	ENSG00000127054	CPSF3L	ENST00000434694
1	1259961	1260040	-	protein_coding	ENSG00000127054	CPSF3L	ENST00000526332
1	1259961	1260051	-	protein_coding	ENSG00000127054	CPSF3L	ENST00000527719
1	1259961	1260039	-	protein_coding	ENSG00000127054	CPSF3L	ENST00000530031
1	1259961	1260051	-	protein_coding	ENSG00000127054	CPSF3L	ENST00000534345
1	1259961	1260040	-	protein_coding	ENSG00000127054	CPSF3L	ENST00000498476
1	1260147	1260482	+	protein_coding	ENSG00000224051	GLTPD1	ENST00000343938
1	1260621	1260975	+	protein_coding	ENSG00000224051	GLTPD1	ENST00000488011
1	1266694	1266916	+	protein_coding	ENSG00000169962	TAS1R3	ENST00000339381
1	1284276	1284492	-	protein_coding	ENSG00000107404	DVL1	ENST00000378891
1	1284276	1284730	-	protein_coding	ENSG00000107404	DVL1	ENST00000378888
1	1293836	1293915	-	protein_coding	ENSG00000162576	MXRA8	ENST00000309212
1	1293836	1293923	-	protein_coding	ENSG00000162576	MXRA8	ENST00000445648
1	1296622	1297157	-	protein_coding	ENSG00000162576	MXRA8	ENST00000477278
1	1293836	1293920	-	protein_coding	ENSG00000162576	MXRA8	ENST00000342753
1	1310085	1310537	-	protein_coding	ENSG00000175756	AURKAIP1	ENST00000338370
1	1310534	1310875	-	protein_coding	ENSG00000175756	AURKAIP1	ENST00000338338
1	1310455	1310549	-	protein_coding	ENSG00000175756	AURKAIP1	ENST00000321751
1	1310377	1310553	-	protein_coding	ENSG00000175756	AURKAIP1	ENST00000378853
1	1333613	1333684	-	protein_coding	ENSG00000221978	CCNL2	ENST00000408952
1	1334399	1334692	-	protein_coding	ENSG00000221978	CCNL2	ENST00000400809
1	1334399	1334697	-	protein_coding	ENSG00000221978	CCNL2	ENST00000408918
1	1333977	1334336	-	protein_coding	ENSG00000221978	CCNL2	ENST00000497013
1	1334902	1335069	+	protein_coding	ENSG00000224870	RP4-758J18.2	ENST00000448629
1	1334907	1335065	+	protein_coding	ENSG00000224870	RP4-758J18.2	ENST00000444362
1	1334932	1335065	+	protein_coding	ENSG00000224870	RP4-758J18.2	ENST00000576232
1	1334942	1335069	+	protein_coding	ENSG00000224870	RP4-758J18.2	ENST00000570344
1	1342511	1342693	-	protein_coding	ENSG00000242485	MRPL20	ENST00000344843
1	1342289	1342378	-	protein_coding	ENSG00000242485	MRPL20	ENST00000492508
1	1342511	1342670	-	protein_coding	ENSG00000242485	MRPL20	ENST00000482352
1	1356513	1356824	-	protein_coding	ENSG00000235098	ANKRD65	ENST00000520296
1	1356513	1357149	-	protein_coding	ENSG00000235098	ANKRD65	ENST00000427211
1	1356513	1356650	-	protein_coding	ENSG00000235098	ANKRD65	ENST00000537107
1	1356177	1356640	-	protein_coding	ENSG00000235098	ANKRD65	ENST00000442470
1	1356177	1356272	-	protein_coding	ENSG00000235098	ANKRD65	ENST00000436362
1	1361508	1361765	+	protein_coding	ENSG00000205116	TMEM88B	ENST00000378821
1	1370241	1370526	+	protein_coding	ENSG00000179403	VWA1	ENST00000495558
1	1370903	1371201	+	protein_coding	ENSG00000179403	VWA1	ENST00000338660
1	1370903	1371201	+	protein_coding	ENSG00000179403	VWA1	ENST00000404702
1	1371051	1371201	+	protein_coding	ENSG00000179403	VWA1	ENST00000476993
1	1371115	1371201	+	protein_coding	ENSG00000179403	VWA1	ENST00000471398
1	1385069	1386138	+	protein_coding	ENSG00000215915	ATAD3C	ENST00000378785
1	1385294	1385421	+	protein_coding	ENSG00000215915	ATAD3C	ENST00000475091
1	1407143	1407469	+	protein_coding	ENSG00000160072	ATAD3B	ENST00000378741
1	1407149	1407469	+	protein_coding	ENSG00000160072	ATAD3B	ENST00000308647
1	1447531	1447853	+	protein_coding	ENSG00000197785	ATAD3A	ENST00000378756
1	1447555	1447853	+	protein_coding	ENSG00000197785	ATAD3A	ENST00000378755
1	1447910	1448070	+	protein_coding	ENSG00000197785	ATAD3A	ENST00000339113
1	1447910	1448070	+	protein_coding	ENSG00000197785	ATAD3A	ENST00000536055
1	1459653	1459777	+	protein_coding	ENSG00000197785	ATAD3A	ENST00000400830
1	1475670	1475737	-	protein_coding	ENSG00000205090	TMEM240	ENST00000378733
1	1475800	1475833	-	protein_coding	ENSG00000205090	TMEM240	ENST00000425828
1	1509858	1510249	-	protein_coding	ENSG00000160075	SSU72	ENST00000291386
1	1509858	1509964	-	protein_coding	ENSG00000160075	SSU72	ENST00000359060
1	1510355	1511373	+	protein_coding	ENSG00000215014	AL645728.1	ENST00000366221
1	1533392	1535476	-	protein_coding	ENSG00000228594	C1orf233	ENST00000422725
1	1550795	1551013	+	protein_coding	ENSG00000197530	MIB2	ENST00000520777
1	1550795	1551013	+	protein_coding	ENSG00000197530	MIB2	ENST00000357210
1	1550795	1551013	+	protein_coding	ENSG00000197530	MIB2	ENST00000360522
1	1550795	1551013	+	protein_coding	ENSG00000197530	MIB2	ENST00000378710
1	1550801	1551013	+	protein_coding	ENSG00000197530	MIB2	ENST00000355826
1	1550817	1551013	+	protein_coding	ENSG00000197530	MIB2	ENST00000518681
1	1550823	1551013	+	protein_coding	ENSG00000197530	MIB2	ENST00000505820
1	1551285	1551480	+	protein_coding	ENSG00000197530	MIB2	ENST00000378712
1	1551654	1551994	+	protein_coding	ENSG00000197530	MIB2	ENST00000510793
1	1551690	1551994	+	protein_coding	ENSG00000197530	MIB2	ENST00000504599
1	1552788	1552895	+	protein_coding	ENSG00000197530	MIB2	ENST00000503789
1	1552940	1553095	+	protein_coding	ENSG00000197530	MIB2	ENST00000378708
1	1559182	1559325	+	protein_coding	ENSG00000197530	MIB2	ENST00000514234
1	1563869	1564102	+	protein_coding	ENSG00000197530	MIB2	ENST00000483015
1	1567474	1567753	+	protein_coding	ENSG00000189409	MMP23B	ENST00000356026
1	1567542	1567753	+	protein_coding	ENSG00000189409	MMP23B	ENST00000472264
1	1567558	1567753	+	protein_coding	ENSG00000189409	MMP23B	ENST00000378675
1	1568162	1568292	+	protein_coding	ENSG00000189409	MMP23B	ENST00000479814
1	1568582	1568734	+	protein_coding	ENSG00000189409	MMP23B	ENST00000435358
1	1568582	1568859	+	protein_coding	ENSG00000189409	MMP23B	ENST00000503792
1	1580487	1580623	-	protein_coding	ENSG00000248333	CDK11B	ENST00000513088
1	1588825	1588935	-	protein_coding	ENSG00000248333	CDK11B	ENST00000407249
1	1588825	1588935	-	protein_coding	ENSG00000248333	CDK11B	ENST00000317673
1	1588825	1588935	-	protein_coding	ENSG00000248333	CDK11B	ENST00000340677
1	1588706	1588714	-	protein_coding	ENSG00000248333	CDK11B	ENST00000341832
1	1590375	1590473	-	protein_coding	ENSG00000248333	CDK11B	ENST00000341028
1	1623888	1624083	-	protein_coding	ENSG00000189339	SLC35E2B	ENST00000378662
1	1623888	1624167	-	protein_coding	ENSG00000189339	SLC35E2B	ENST00000234800
1	1654027	1654270	-	protein_coding	ENSG00000008128	CDK11A	ENST00000356200
1	1654147	1654270	-	protein_coding	ENSG00000008128	CDK11A	ENST00000378638
1	1655697	1655763	-	protein_coding	ENSG00000008128	CDK11A	ENST00000404249
1	1655697	1655763	-	protein_coding	ENSG00000008128	CDK11A	ENST00000357760
1	1655697	1655763	-	protein_coding	ENSG00000008128	CDK11A	ENST00000358779
1	1655697	1655763	-	protein_coding	ENSG00000008128	CDK11A	ENST00000378633
1	1655697	1655766	-	protein_coding	ENSG00000008128	CDK11A	ENST00000378635
1	1655239	1655471	-	protein_coding	ENSG00000008128	CDK11A	ENST00000479362
1	1655388	1655713	-	protein_coding	ENSG00000008128	CDK11A	ENST00000401096
1	1677163	1677358	-	protein_coding	ENSG00000215790	SLC35E2	ENST00000355439
1	1677163	1677431	-	protein_coding	ENSG00000215790	SLC35E2	ENST00000400924
1	1677163	1677431	-	protein_coding	ENSG00000215790	SLC35E2	ENST00000246421
1	1709728	1709909	-	protein_coding	ENSG00000008130	NADK	ENST00000341426
1	1710185	1710229	-	protein_coding	ENSG00000008130	NADK	ENST00000341991
1	1711344	1711508	-	protein_coding	ENSG00000008130	NADK	ENST00000378625
1	1709728	1709909	-	protein_coding	ENSG00000008130	NADK	ENST00000344463
1	1689804	1690081	-	protein_coding	ENSG00000008130	NADK	ENST00000342348
1	1688620	1688707	-	protein_coding	ENSG00000008130	NADK	ENST00000469045
1	1689804	1690014	-	protein_coding	ENSG00000008130	NADK	ENST00000400922
1	1822259	1822495	-	protein_coding	ENSG00000078369	GNB1	ENST00000378609
1	1822259	1822275	-	protein_coding	ENSG00000078369	GNB1	ENST00000439272
1	1821803	1821840	-	protein_coding	ENSG00000078369	GNB1	ENST00000434686
1	1763671	1763724	-	protein_coding	ENSG00000078369	GNB1	ENST00000437146
1	1846266	1846746	+	protein_coding	ENSG00000169885	CALML6	ENST00000307786
1	1846547	1846746	+	protein_coding	ENSG00000169885	CALML6	ENST00000378604
1	1849692	1850236	-	protein_coding	ENSG00000178821	TMEM52	ENST00000378602
1	1850621	1850712	-	protein_coding	ENSG00000178821	TMEM52	ENST00000310991
1	1850484	1850697	-	protein_coding	ENSG00000178821	TMEM52	ENST00000378598
1	1850484	1850708	-	protein_coding	ENSG00000178821	TMEM52	ENST00000416272
1	1887130	1887154	-	protein_coding	ENSG00000142609	C1orf222	ENST00000493964
1	1891403	1891545	-	protein_coding	ENSG00000142609	C1orf222	ENST00000493316
1	1891403	1891547	-	protein_coding	ENSG00000142609	C1orf222	ENST00000461752
1	1897810	1897965	-	protein_coding	ENSG00000142609	C1orf222	ENST00000604159
1	1922329	1922368	-	protein_coding	ENSG00000142609	C1orf222	ENST00000378590
1	1935140	1935153	-	protein_coding	ENSG00000142609	C1orf222	ENST00000434971
1	1950780	1950930	+	protein_coding	ENSG00000187730	GABRD	ENST00000378585
1	1981909	1982140	+	protein_coding	ENSG00000067606	PRKCZ	ENST00000378567
1	1981924	1982140	+	protein_coding	ENSG00000067606	PRKCZ	ENST00000468310
1	1982247	1982451	+	protein_coding	ENSG00000067606	PRKCZ	ENST00000503297
1	2004901	2005368	+	protein_coding	ENSG00000067606	PRKCZ	ENST00000400921
1	2005158	2005368	+	protein_coding	ENSG00000067606	PRKCZ	ENST00000495347
1	2005425	2005714	+	protein_coding	ENSG00000067606	PRKCZ	ENST00000461106
1	2006127	2006206	+	protein_coding	ENSG00000067606	PRKCZ	ENST00000461465
1	2006294	2006572	+	protein_coding	ENSG00000067606	PRKCZ	ENST00000470596
1	2006683	2006818	+	protein_coding	ENSG00000067606	PRKCZ	ENST00000496325
1	2036155	2036334	+	protein_coding	ENSG00000067606	PRKCZ	ENST00000482686
1	2036155	2036334	+	protein_coding	ENSG00000067606	PRKCZ	ENST00000400920
1	2036178	2036334	+	protein_coding	ENSG00000067606	PRKCZ	ENST00000486681
1	2043093	2043256	+	protein_coding	ENSG00000067606	PRKCZ	ENST00000470986
1	2047644	2047749	+	protein_coding	ENSG00000067606	PRKCZ	ENST00000470511
1	2065077	2065439	+	protein_coding	ENSG00000067606	PRKCZ	ENST00000471018
1	2066252	2066525	+	protein_coding	ENSG00000067606	PRKCZ	ENST00000466352
1	2066429	2066525	+	protein_coding	ENSG00000067606	PRKCZ	ENST00000497183
1	2126127	2126180	-	protein_coding	ENSG00000162585	C1orf86	ENST00000400919
1	2126127	2126190	-	protein_coding	ENSG00000162585	C1orf86	ENST00000400918
1	2126127	2126189	-	protein_coding	ENSG00000162585	C1orf86	ENST00000378543
1	2126127	2126213	-	protein_coding	ENSG00000162585	C1orf86	ENST00000378546
1	2130193	2130427	-	protein_coding	ENSG00000162585	C1orf86	ENST00000378545
1	2126127	2126187	-	protein_coding	ENSG00000162585	C1orf86	ENST00000420515
1	2121237	2123179	+	protein_coding	ENSG00000269554	AL590822.2	ENST00000597060
1	2143360	2145620	-	protein_coding	ENSG00000203301	AL590822.1	ENST00000545087
1	2160134	2161174	+	protein_coding	ENSG00000157933	SKI	ENST00000378536
1	2322897	2323146	-	protein_coding	ENSG00000116151	MORN1	ENST00000378531
1	2322897	2323146	-	protein_coding	ENSG00000116151	MORN1	ENST00000378529
1	2319678	2319776	-	protein_coding	ENSG00000116151	MORN1	ENST00000449373
1	2321364	2321435	-	protein_coding	ENSG00000116151	MORN1	ENST00000494279
1	2258581	2259042	+	protein_coding	ENSG00000269753	AL589739.1	ENST00000600779
1	2323267	2323397	+	protein_coding	ENSG00000157916	RER1	ENST00000378518
1	2323272	2323397	+	protein_coding	ENSG00000157916	RER1	ENST00000605895
1	2323279	2323397	+	protein_coding	ENSG00000157916	RER1	ENST00000378513
1	2323282	2323397	+	protein_coding	ENSG00000157916	RER1	ENST00000306256
1	2323329	2323397	+	protein_coding	ENSG00000157916	RER1	ENST00000378512
1	2324613	2324670	+	protein_coding	ENSG00000157916	RER1	ENST00000443438
1	2325444	2327310	+	protein_coding	ENSG00000157916	RER1	ENST00000488353
1	2343830	2343969	-	protein_coding	ENSG00000157911	PEX10	ENST00000288774
1	2343830	2344010	-	protein_coding	ENSG00000157911	PEX10	ENST00000447513
1	2343830	2343979	-	protein_coding	ENSG00000157911	PEX10	ENST00000507596
1	2345036	2345236	-	protein_coding	ENSG00000157911	PEX10	ENST00000508384
1	2357419	2357476	+	protein_coding	ENSG00000149527	PLCH2	ENST00000609981
1	2398898	2399101	+	protein_coding	ENSG00000149527	PLCH2	ENST00000449969
1	2407754	2408151	+	protein_coding	ENSG00000149527	PLCH2	ENST00000419816
1	2407754	2408151	+	protein_coding	ENSG00000149527	PLCH2	ENST00000378486
1	2407754	2408151	+	protein_coding	ENSG00000149527	PLCH2	ENST00000378488
1	2407754	2408151	+	protein_coding	ENSG00000149527	PLCH2	ENST00000288766
1	2411327	2411417	+	protein_coding	ENSG00000149527	PLCH2	ENST00000278878
1	2457903	2458039	-	protein_coding	ENSG00000157881	PANK4	ENST00000378466
1	2457903	2458035	-	protein_coding	ENSG00000157881	PANK4	ENST00000435556
1	2461550	2461684	-	protein_coding	ENSG00000197921	HES5	ENST00000378453
1	2487078	2487106	+	protein_coding	ENSG00000157873	TNFRSF14	ENST00000426449
1	2487230	2487289	+	protein_coding	ENSG00000157873	TNFRSF14	ENST00000434817
1	2487241	2487691	+	protein_coding	ENSG00000157873	TNFRSF14	ENST00000435221
1	2487419	2487471	+	protein_coding	ENSG00000157873	TNFRSF14	ENST00000451778
1	2487661	2487700	+	protein_coding	ENSG00000157873	TNFRSF14	ENST00000409119
1	2487805	2488172	+	protein_coding	ENSG00000157873	TNFRSF14	ENST00000355716
1	2518214	2518387	+	protein_coding	ENSG00000157870	FAM213B	ENST00000419916
1	2518219	2518387	+	protein_coding	ENSG00000157870	FAM213B	ENST00000378424
1	2518235	2518387	+	protein_coding	ENSG00000157870	FAM213B	ENST00000537325
1	2518237	2518387	+	protein_coding	ENSG00000157870	FAM213B	ENST00000378427
1	2518249	2518387	+	protein_coding	ENSG00000157870	FAM213B	ENST00000378425
1	2518258	2518387	+	protein_coding	ENSG00000157870	FAM213B	ENST00000444521
1	2518272	2518387	+	protein_coding	ENSG00000157870	FAM213B	ENST00000465233
1	2518316	2518387	+	protein_coding	ENSG00000157870	FAM213B	ENST00000498083
1	2524094	2524117	-	protein_coding	ENSG00000142606	MMEL1	ENST00000471840
1	2564305	2564481	-	protein_coding	ENSG00000142606	MMEL1	ENST00000288709
1	2564305	2564429	-	protein_coding	ENSG00000142606	MMEL1	ENST00000378412
1	2560770	2560933	-	protein_coding	ENSG00000142606	MMEL1	ENST00000502556
1	2718142	2718286	-	protein_coding	ENSG00000215912	TTC34	ENST00000401094
1	2706068	2706236	-	protein_coding	ENSG00000215912	TTC34	ENST00000401095
1	2706068	2706280	-	protein_coding	ENSG00000215912	TTC34	ENST00000574621
1	2938046	2939465	+	protein_coding	ENSG00000169717	ACTRT2	ENST00000378404
1	2985732	2985860	+	protein_coding	ENSG00000142611	PRDM16	ENST00000511072
1	2985742	2985860	+	protein_coding	ENSG00000142611	PRDM16	ENST00000378398
1	2985742	2985860	+	protein_coding	ENSG00000142611	PRDM16	ENST00000441472
1	2985742	2985860	+	protein_coding	ENSG00000142611	PRDM16	ENST00000442529
1	2985761	2985860	+	protein_coding	ENSG00000142611	PRDM16	ENST00000378391
1	2985775	2985860	+	protein_coding	ENSG00000142611	PRDM16	ENST00000514189
1	2985775	2985860	+	protein_coding	ENSG00000142611	PRDM16	ENST00000270722
1	3160696	3160701	+	protein_coding	ENSG00000142611	PRDM16	ENST00000463591
1	3313055	3313157	+	protein_coding	ENSG00000142611	PRDM16	ENST00000509860
1	3370990	3371375	+	protein_coding	ENSG00000130762	ARHGEF16	ENST00000378378
1	3382569	3382757	+	protein_coding	ENSG00000130762	ARHGEF16	ENST00000378373
1	3383535	3383901	+	protein_coding	ENSG00000130762	ARHGEF16	ENST00000378371
1	3385108	3385500	+	protein_coding	ENSG00000130762	ARHGEF16	ENST00000445297
1	3388188	3388355	+	protein_coding	ENSG00000130762	ARHGEF16	ENST00000418137
1	3388188	3388355	+	protein_coding	ENSG00000130762	ARHGEF16	ENST00000413250
1	3447644	3448012	-	protein_coding	ENSG00000162591	MEGF6	ENST00000294599
1	3527702	3528059	-	protein_coding	ENSG00000162591	MEGF6	ENST00000356575
1	3413219	3413281	-	protein_coding	ENSG00000162591	MEGF6	ENST00000491842
1	3541566	3541837	+	protein_coding	ENSG00000158109	TPRG1L	ENST00000378344
1	3541614	3541837	+	protein_coding	ENSG00000158109	TPRG1L	ENST00000344579
1	3566495	3566622	-	protein_coding	ENSG00000116213	WRAP73	ENST00000378322
1	3566495	3566637	-	protein_coding	ENSG00000116213	WRAP73	ENST00000270708
1	3566495	3566590	-	protein_coding	ENSG00000116213	WRAP73	ENST00000424367
1	3569277	3569325	-	protein_coding	ENSG00000116213	WRAP73	ENST00000465916
1	3566495	3566627	-	protein_coding	ENSG00000116213	WRAP73	ENST00000419924
1	3569084	3569205	+	protein_coding	ENSG00000078900	TP73	ENST00000378295
1	3569084	3569205	+	protein_coding	ENSG00000078900	TP73	ENST00000604074
1	3569129	3569205	+	protein_coding	ENSG00000078900	TP73	ENST00000354437
1	3569129	3569205	+	protein_coding	ENSG00000078900	TP73	ENST00000357733
1	3569129	3569205	+	protein_coding	ENSG00000078900	TP73	ENST00000346387
1	3598930	3598994	+	protein_coding	ENSG00000078900	TP73	ENST00000603362
1	3598930	3598994	+	protein_coding	ENSG00000078900	TP73	ENST00000604479
1	3607236	3607508	+	protein_coding	ENSG00000078900	TP73	ENST00000378285
1	3607236	3607508	+	protein_coding	ENSG00000078900	TP73	ENST00000378280
1	3607236	3607508	+	protein_coding	ENSG00000078900	TP73	ENST00000378288
1	3614622	3614715	+	protein_coding	ENSG00000078900	TP73	ENST00000378290
1	3668962	3669363	+	protein_coding	ENSG00000162592	CCDC27	ENST00000294600
1	3689352	3689405	+	protein_coding	ENSG00000235169	SMIM1	ENST00000444870
1	3689389	3689745	+	protein_coding	ENSG00000235169	SMIM1	ENST00000452264
1	3689627	3689745	+	protein_coding	ENSG00000235169	SMIM1	ENST00000561886
1	3712426	3713068	-	protein_coding	ENSG00000130764	LRRC47	ENST00000378251
1	3773453	3773763	-	protein_coding	ENSG00000116198	CEP104	ENST00000378230
1	3745830	3745870	-	protein_coding	ENSG00000116198	CEP104	ENST00000438539
1	3745830	3745937	-	protein_coding	ENSG00000116198	CEP104	ENST00000461667
1	3755528	3755674	-	protein_coding	ENSG00000116198	CEP104	ENST00000443466
1	3773453	3773758	-	protein_coding	ENSG00000116198	CEP104	ENST00000428079
1	3773453	3773778	-	protein_coding	ENSG00000116198	CEP104	ENST00000378223
1	3773845	3774281	+	protein_coding	ENSG00000169598	DFFB	ENST00000378209
1	3773845	3774281	+	protein_coding	ENSG00000169598	DFFB	ENST00000338895
1	3773845	3774281	+	protein_coding	ENSG00000169598	DFFB	ENST00000378212
1	3773845	3774281	+	protein_coding	ENSG00000169598	DFFB	ENST00000341385
1	3816736	3816849	-	protein_coding	ENSG00000198912	C1orf174	ENST00000361605
1	4714792	4715514	+	protein_coding	ENSG00000196581	AJAP1	ENST00000378190
1	4715105	4715514	+	protein_coding	ENSG00000196581	AJAP1	ENST00000378191
1	6052304	6052531	-	protein_coding	ENSG00000131697	NPHP4	ENST00000378156
1	6051526	6051616	+	protein_coding	ENSG00000069424	KCNAB2	ENST00000378111
1	6052423	6052848	+	protein_coding	ENSG00000069424	KCNAB2	ENST00000378097
1	6052761	6052848	+	protein_coding	ENSG00000069424	KCNAB2	ENST00000378092
1	6052771	6052848	+	protein_coding	ENSG00000069424	KCNAB2	ENST00000445501
1	6086360	6086505	+	protein_coding	ENSG00000069424	KCNAB2	ENST00000389632
1	6086360	6086505	+	protein_coding	ENSG00000069424	KCNAB2	ENST00000428161
1	6086380	6086505	+	protein_coding	ENSG00000069424	KCNAB2	ENST00000602612
1	6086380	6086505	+	protein_coding	ENSG00000069424	KCNAB2	ENST00000378087
1	6086380	6086505	+	protein_coding	ENSG00000069424	KCNAB2	ENST00000341524
1	6086380	6086505	+	protein_coding	ENSG00000069424	KCNAB2	ENST00000352527
1	6087357	6087519	+	protein_coding	ENSG00000069424	KCNAB2	ENST00000435937
1	6094343	6094854	+	protein_coding	ENSG00000069424	KCNAB2	ENST00000164247
1	6100678	6100705	+	protein_coding	ENSG00000069424	KCNAB2	ENST00000472700
1	6105981	6106243	+	protein_coding	ENSG00000069424	KCNAB2	ENST00000378083
1	6106174	6106243	+	protein_coding	ENSG00000069424	KCNAB2	ENST00000458166
1	6142321	6142334	+	protein_coding	ENSG00000069424	KCNAB2	ENST00000462676
1	6101389	6101399	-	protein_coding	ENSG00000268332	AL035406.1	ENST00000594544
1	6240005	6240183	-	protein_coding	ENSG00000116254	CHD5	ENST00000262450
1	6240005	6240183	-	protein_coding	ENSG00000116254	CHD5	ENST00000378021
1	6166676	6166832	-	protein_coding	ENSG00000116254	CHD5	ENST00000475121
1	6257712	6257817	-	protein_coding	ENSG00000116251	RPL22	ENST00000484532
1	6259622	6259672	-	protein_coding	ENSG00000116251	RPL22	ENST00000234875
1	6260549	6260902	-	protein_coding	ENSG00000116251	RPL22	ENST00000497965
1	6269195	6269304	-	protein_coding	ENSG00000116251	RPL22	ENST00000471204
1	6259430	6259613	-	protein_coding	ENSG00000116251	RPL22	ENST00000465387
1	6263427	6263554	-	protein_coding	ENSG00000116251	RPL22	ENST00000462296
1	6269195	6269449	-	protein_coding	ENSG00000116251	RPL22	ENST00000465335
1	6266189	6266362	+	protein_coding	ENSG00000158286	RNF207	ENST00000377948
1	6266236	6266362	+	protein_coding	ENSG00000158286	RNF207	ENST00000377939
1	6295777	6296000	-	protein_coding	ENSG00000116237	ICMT	ENST00000343813
1	6295777	6296000	-	protein_coding	ENSG00000116237	ICMT	ENST00000362035
1	6304252	6304301	+	protein_coding	ENSG00000173673	HES3	ENST00000377898
1	6320885	6321035	-	protein_coding	ENSG00000158292	GPR153	ENST00000377893
1	6453317	6453421	-	protein_coding	ENSG00000097021	ACOT7	ENST00000608083
1	6418886	6419404	-	protein_coding	ENSG00000097021	ACOT7	ENST00000377842
1	6420630	6420767	-	protein_coding	ENSG00000097021	ACOT7	ENST00000377845
1	6445554	6445873	-	protein_coding	ENSG00000097021	ACOT7	ENST00000377855
1	6453317	6454451	-	protein_coding	ENSG00000097021	ACOT7	ENST00000361521
1	6453321	6453438	-	protein_coding	ENSG00000097021	ACOT7	ENST00000545482
1	6412285	6412309	-	protein_coding	ENSG00000097021	ACOT7	ENST00000473466
1	6420630	6420766	-	protein_coding	ENSG00000097021	ACOT7	ENST00000541130
1	6484538	6484730	-	protein_coding	ENSG00000069812	HES2	ENST00000377837
1	6479836	6479963	-	protein_coding	ENSG00000069812	HES2	ENST00000377836
1	6479836	6479979	-	protein_coding	ENSG00000069812	HES2	ENST00000377834
1	6479836	6479967	-	protein_coding	ENSG00000069812	HES2	ENST00000487437
1	6479836	6479977	-	protein_coding	ENSG00000069812	HES2	ENST00000489730
1	6484848	6485309	+	protein_coding	ENSG00000187017	ESPN	ENST00000377828
1	6500438	6500500	+	protein_coding	ENSG00000187017	ESPN	ENST00000418286
1	6508103	6508177	+	protein_coding	ENSG00000187017	ESPN	ENST00000461727
1	6508580	6508621	+	protein_coding	ENSG00000187017	ESPN	ENST00000478323
1	6508845	6508862	+	protein_coding	ENSG00000187017	ESPN	ENST00000416731
1	6511718	6511808	+	protein_coding	ENSG00000187017	ESPN	ENST00000434576
1	6526129	6526235	-	protein_coding	ENSG00000215788	TNFRSF25	ENST00000377782
1	6526129	6526255	-	protein_coding	ENSG00000215788	TNFRSF25	ENST00000356876
1	6526129	6526235	-	protein_coding	ENSG00000215788	TNFRSF25	ENST00000351959
1	6526129	6526167	-	protein_coding	ENSG00000215788	TNFRSF25	ENST00000351748
1	6526129	6526167	-	protein_coding	ENSG00000215788	TNFRSF25	ENST00000348333
1	6525500	6525690	-	protein_coding	ENSG00000215788	TNFRSF25	ENST00000481401
1	6579505	6580069	-	protein_coding	ENSG00000171680	PLEKHG5	ENST00000377748
1	6550505	6550640	-	protein_coding	ENSG00000171680	PLEKHG5	ENST00000340850
1	6545896	6546014	-	protein_coding	ENSG00000171680	PLEKHG5	ENST00000400913
1	6550505	6550630	-	protein_coding	ENSG00000171680	PLEKHG5	ENST00000377725
1	6551697	6551760	-	protein_coding	ENSG00000171680	PLEKHG5	ENST00000377728
1	6556553	6556756	-	protein_coding	ENSG00000171680	PLEKHG5	ENST00000377732
1	6557380	6557450	-	protein_coding	ENSG00000171680	PLEKHG5	ENST00000400915
1	6579505	6580121	-	protein_coding	ENSG00000171680	PLEKHG5	ENST00000377740
1	6545384	6545529	-	protein_coding	ENSG00000171680	PLEKHG5	ENST00000535355
1	6579505	6580069	-	protein_coding	ENSG00000171680	PLEKHG5	ENST00000377737
1	6557019	6557156	-	protein_coding	ENSG00000171680	PLEKHG5	ENST00000537245
1	6557380	6557484	-	protein_coding	ENSG00000171680	PLEKHG5	ENST00000544978
1	6614167	6614595	-	protein_coding	ENSG00000162408	NOL9	ENST00000377705
1	6615241	6615624	+	protein_coding	ENSG00000173662	TAS1R1	ENST00000333172
1	6615338	6615624	+	protein_coding	ENSG00000173662	TAS1R1	ENST00000328191
1	6615369	6615624	+	protein_coding	ENSG00000173662	TAS1R1	ENST00000351136
1	6631001	6631275	+	protein_coding	ENSG00000173662	TAS1R1	ENST00000411823
1	6631001	6631275	+	protein_coding	ENSG00000173662	TAS1R1	ENST00000415267
1	6640061	6640109	+	protein_coding	ENSG00000204859	ZBTB48	ENST00000319084
1	6640077	6640130	+	protein_coding	ENSG00000204859	ZBTB48	ENST00000435905
1	6640108	6640196	+	protein_coding	ENSG00000204859	ZBTB48	ENST00000377674
1	6640148	6640196	+	protein_coding	ENSG00000204859	ZBTB48	ENST00000488936
1	6661857	6662929	-	protein_coding	ENSG00000162413	KLHL21	ENST00000377658
1	6661857	6663061	-	protein_coding	ENSG00000162413	KLHL21	ENST00000377663
1	6674510	6674620	-	protein_coding	ENSG00000162413	KLHL21	ENST00000467612
1	6659810	6659876	-	protein_coding	ENSG00000162413	KLHL21	ENST00000496707
1	6674510	6674667	-	protein_coding	ENSG00000162413	KLHL21	ENST00000463043
1	6673745	6674165	+	protein_coding	ENSG00000116273	PHF13	ENST00000377648
1	6684926	6685014	+	protein_coding	ENSG00000041988	THAP3	ENST00000054650
1	6685241	6685352	+	protein_coding	ENSG00000041988	THAP3	ENST00000307896
1	6685252	6685352	+	protein_coding	ENSG00000041988	THAP3	ENST00000377627
1	6685290	6685352	+	protein_coding	ENSG00000041988	THAP3	ENST00000472925
1	6740968	6741097	-	protein_coding	ENSG00000007923	DNAJC11	ENST00000451196
1	6761789	6761984	-	protein_coding	ENSG00000007923	DNAJC11	ENST00000377577
1	6740968	6741097	-	protein_coding	ENSG00000007923	DNAJC11	ENST00000349363
1	6761789	6761984	-	protein_coding	ENSG00000007923	DNAJC11	ENST00000294401
1	6741293	6741356	-	protein_coding	ENSG00000007923	DNAJC11	ENST00000542246
1	6761789	6761863	-	protein_coding	ENSG00000007923	DNAJC11	ENST00000377573
1	6761789	6761862	-	protein_coding	ENSG00000007923	DNAJC11	ENST00000426784
1	6845384	6845635	+	protein_coding	ENSG00000171735	CAMTA1	ENST00000303635
1	6845540	6845635	+	protein_coding	ENSG00000171735	CAMTA1	ENST00000473578
1	6845551	6845635	+	protein_coding	ENSG00000171735	CAMTA1	ENST00000557126
1	6845578	6845635	+	protein_coding	ENSG00000171735	CAMTA1	ENST00000467404
1	6845591	6845635	+	protein_coding	ENSG00000171735	CAMTA1	ENST00000439411
1	7796468	7796600	+	protein_coding	ENSG00000171735	CAMTA1	ENST00000495233
1	7804974	7805082	+	protein_coding	ENSG00000171735	CAMTA1	ENST00000490905
1	7805021	7805082	+	protein_coding	ENSG00000171735	CAMTA1	ENST00000476864
1	7831329	7831445	+	protein_coding	ENSG00000049245	VAMP3	ENST00000054666
1	7832767	7833258	+	protein_coding	ENSG00000049245	VAMP3	ENST00000470357
1	7844380	7844436	+	protein_coding	ENSG00000049246	PER3	ENST00000377541
1	7844714	7845065	+	protein_coding	ENSG00000049246	PER3	ENST00000377532
1	7844763	7845065	+	protein_coding	ENSG00000049246	PER3	ENST00000361923
1	7913367	7913572	-	protein_coding	ENSG00000049247	UTS2	ENST00000377516
1	7912961	7913095	-	protein_coding	ENSG00000049247	UTS2	ENST00000361696
1	7913367	7913491	-	protein_coding	ENSG00000049247	UTS2	ENST00000054668
1	8000844	8000926	-	protein_coding	ENSG00000049249	TNFRSF9	ENST00000377507
1	7995073	7995160	-	protein_coding	ENSG00000049249	TNFRSF9	ENST00000474475
1	8014351	8014383	+	protein_coding	ENSG00000116288	PARK7	ENST00000493373
1	8021723	8021853	+	protein_coding	ENSG00000116288	PARK7	ENST00000338639
1	8021752	8021795	+	protein_coding	ENSG00000116288	PARK7	ENST00000493678
1	8021761	8021795	+	protein_coding	ENSG00000116288	PARK7	ENST00000377493
1	8021954	8022141	+	protein_coding	ENSG00000116288	PARK7	ENST00000377491
1	8022029	8022161	+	protein_coding	ENSG00000116288	PARK7	ENST00000377488
1	8025411	8025485	+	protein_coding	ENSG00000116288	PARK7	ENST00000469225
1	8086218	8086343	-	protein_coding	ENSG00000116285	ERRFI1	ENST00000474874
1	8086218	8086368	-	protein_coding	ENSG00000116285	ERRFI1	ENST00000377482
1	8075555	8075693	-	protein_coding	ENSG00000116285	ERRFI1	ENST00000467067
1	8086218	8086356	-	protein_coding	ENSG00000116285	ERRFI1	ENST00000469499
1	8377886	8378246	+	protein_coding	ENSG00000162426	SLC45A1	ENST00000471889
1	8378169	8378246	+	protein_coding	ENSG00000162426	SLC45A1	ENST00000377479
1	8384390	8384786	+	protein_coding	ENSG00000162426	SLC45A1	ENST00000289877
1	8877219	8877524	-	protein_coding	ENSG00000142599	RERE	ENST00000337907
1	8585818	8585998	-	protein_coding	ENSG00000142599	RERE	ENST00000377464
1	8716032	8716430	-	protein_coding	ENSG00000142599	RERE	ENST00000400907
1	8483621	8483726	-	protein_coding	ENSG00000142599	RERE	ENST00000476556
1	8877219	8877702	-	protein_coding	ENSG00000142599	RERE	ENST00000400908
1	8422743	8422904	-	protein_coding	ENSG00000142599	RERE	ENST00000505225
1	8484848	8485272	-	protein_coding	ENSG00000142599	RERE	ENST00000488215
1	8585818	8586086	-	protein_coding	ENSG00000142599	RERE	ENST00000464972
1	8684369	8684439	-	protein_coding	ENSG00000142599	RERE	ENST00000514428
1	8763114	8763278	-	protein_coding	ENSG00000142599	RERE	ENST00000468247
1	8938639	8938749	-	protein_coding	ENSG00000074800	ENO1	ENST00000234590
1	8938274	8938326	-	protein_coding	ENSG00000074800	ENO1	ENST00000497492
1	8938639	8939308	-	protein_coding	ENSG00000074800	ENO1	ENST00000489867
1	9005926	9006024	+	protein_coding	ENSG00000131686	CA6	ENST00000549778
1	9005941	9006024	+	protein_coding	ENSG00000131686	CA6	ENST00000480186
1	9005942	9006024	+	protein_coding	ENSG00000131686	CA6	ENST00000377443
1	9005946	9006024	+	protein_coding	ENSG00000131686	CA6	ENST00000377436
1	9005946	9006024	+	protein_coding	ENSG00000131686	CA6	ENST00000377442
1	9086354	9086404	-	protein_coding	ENSG00000197241	SLC2A7	ENST00000400906
1	9129563	9129775	-	protein_coding	ENSG00000142583	SLC2A5	ENST00000377424
1	9109159	9109319	-	protein_coding	ENSG00000142583	SLC2A5	ENST00000536305
1	9129563	9129604	-	protein_coding	ENSG00000142583	SLC2A5	ENST00000535586
1	9129563	9129663	-	protein_coding	ENSG00000142583	SLC2A5	ENST00000377414
1	9131732	9131786	-	protein_coding	ENSG00000142583	SLC2A5	ENST00000484798
1	9132108	9132324	-	protein_coding	ENSG00000142583	SLC2A5	ENST00000474145
1	9133135	9133181	-	protein_coding	ENSG00000142583	SLC2A5	ENST00000479813
1	9148431	9148537	-	protein_coding	ENSG00000142583	SLC2A5	ENST00000486632
1	9148431	9148516	-	protein_coding	ENSG00000142583	SLC2A5	ENST00000487835
1	9148431	9148502	-	protein_coding	ENSG00000142583	SLC2A5	ENST00000464985
1	9129757	9129910	-	protein_coding	ENSG00000142583	SLC2A5	ENST00000473209
1	9188704	9189229	-	protein_coding	ENSG00000180758	GPR157	ENST00000377411
1	9188704	9189183	-	protein_coding	ENSG00000180758	GPR157	ENST00000414642
1	9171335	9171429	-	protein_coding	ENSG00000180758	GPR157	ENST00000465853
1	9294834	9295125	+	protein_coding	ENSG00000049239	H6PD	ENST00000377403
1	9299903	9300077	+	protein_coding	ENSG00000049239	H6PD	ENST00000602477
1	9352939	9353130	+	protein_coding	ENSG00000171621	SPSB1	ENST00000328089
1	9354587	9354653	+	protein_coding	ENSG00000171621	SPSB1	ENST00000450402
1	9411490	9411669	+	protein_coding	ENSG00000171621	SPSB1	ENST00000357898
1	9415766	9416644	+	protein_coding	ENSG00000171621	SPSB1	ENST00000377399
1	9599541	9599806	+	protein_coding	ENSG00000171612	SLC25A33	ENST00000302692
1	9648932	9649101	+	protein_coding	ENSG00000188807	TMEM201	ENST00000377376
1	9648980	9649101	+	protein_coding	ENSG00000188807	TMEM201	ENST00000340305
1	9648980	9649101	+	protein_coding	ENSG00000188807	TMEM201	ENST00000340381
1	9656955	9657111	+	protein_coding	ENSG00000188807	TMEM201	ENST00000416541
1	9711790	9711860	+	protein_coding	ENSG00000171608	PIK3CD	ENST00000536656
1	9711803	9711860	+	protein_coding	ENSG00000171608	PIK3CD	ENST00000377346
1	9770256	9770338	+	protein_coding	ENSG00000171608	PIK3CD	ENST00000361110
1	9778127	9778216	+	protein_coding	ENSG00000171608	PIK3CD	ENST00000543390
1	9714256	9714644	-	protein_coding	ENSG00000179840	C1orf200	ENST00000377320
1	9883701	9884584	-	protein_coding	ENSG00000171603	CLSTN1	ENST00000377298
1	9811531	9811639	-	protein_coding	ENSG00000171603	CLSTN1	ENST00000435891
1	9883701	9884042	-	protein_coding	ENSG00000171603	CLSTN1	ENST00000361311
1	9883701	9884584	-	protein_coding	ENSG00000171603	CLSTN1	ENST00000377288
1	9970153	9970321	-	protein_coding	ENSG00000178585	CTNNBIP1	ENST00000377263
1	9932027	9932150	-	protein_coding	ENSG00000178585	CTNNBIP1	ENST00000537447
1	9970153	9970394	-	protein_coding	ENSG00000178585	CTNNBIP1	ENST00000400904
1	9953067	9953295	-	protein_coding	ENSG00000178585	CTNNBIP1	ENST00000377258
1	9938198	9938234	-	protein_coding	ENSG00000178585	CTNNBIP1	ENST00000377256
1	9995550	9995678	-	protein_coding	ENSG00000162441	LZIC	ENST00000488540
1	10003307	10003387	-	protein_coding	ENSG00000162441	LZIC	ENST00000377223
1	10002682	10002826	-	protein_coding	ENSG00000162441	LZIC	ENST00000400903
1	10003407	10003422	-	protein_coding	ENSG00000162441	LZIC	ENST00000541052
1	10003407	10003465	-	protein_coding	ENSG00000162441	LZIC	ENST00000377213
1	10003486	10003573	+	protein_coding	ENSG00000173614	NMNAT1	ENST00000403197
1	10003486	10003573	+	protein_coding	ENSG00000173614	NMNAT1	ENST00000377205
1	10041110	10041228	+	protein_coding	ENSG00000173614	NMNAT1	ENST00000496751
1	10057274	10057389	+	protein_coding	ENSG00000162444	RBP7	ENST00000294435
1	10092890	10093752	+	protein_coding	ENSG00000130939	UBE4B	ENST00000253251
1	10093016	10093752	+	protein_coding	ENSG00000130939	UBE4B	ENST00000377157
1	10093332	10093752	+	protein_coding	ENSG00000130939	UBE4B	ENST00000377153
1	10093654	10093752	+	protein_coding	ENSG00000130939	UBE4B	ENST00000343090
1	10182100	10182134	+	protein_coding	ENSG00000130939	UBE4B	ENST00000470736
1	10270863	10270936	+	protein_coding	ENSG00000054523	KIF1B	ENST00000377093
1	10270863	10270936	+	protein_coding	ENSG00000054523	KIF1B	ENST00000263934
1	10271674	10271796	+	protein_coding	ENSG00000054523	KIF1B	ENST00000377086
1	10290822	10291055	+	protein_coding	ENSG00000054523	KIF1B	ENST00000377083
1	10292308	10292492	+	protein_coding	ENSG00000054523	KIF1B	ENST00000377081
1	10458649	10458808	+	protein_coding	ENSG00000142657	PGD	ENST00000491493
1	10459126	10459182	+	protein_coding	ENSG00000142657	PGD	ENST00000541529
1	10459137	10459182	+	protein_coding	ENSG00000142657	PGD	ENST00000270776
1	10459169	10459182	+	protein_coding	ENSG00000142657	PGD	ENST00000483936
1	10459175	10459387	+	protein_coding	ENSG00000142657	PGD	ENST00000538557
1	10459555	10459761	+	protein_coding	ENSG00000142657	PGD	ENST00000465632
1	10459689	10459761	+	protein_coding	ENSG00000142657	PGD	ENST00000460189
1	10490159	10490625	+	protein_coding	ENSG00000175279	APITD1	ENST00000602787
1	10490159	10490625	+	protein_coding	ENSG00000175279	APITD1	ENST00000602296
1	10490500	10490625	+	protein_coding	ENSG00000175279	APITD1	ENST00000309048
1	10490840	10491458	+	protein_coding	ENSG00000175279	APITD1	ENST00000477755
1	10490159	10490625	+	protein_coding	ENSG00000251503	APITD1-CORT	ENST00000400900
1	10490441	10490625	+	protein_coding	ENSG00000251503	APITD1-CORT	ENST00000470413
1	10494724	10494747	+	protein_coding	ENSG00000251503	APITD1-CORT	ENST00000602446
1	10509776	10510379	+	protein_coding	ENSG00000241563	CORT	ENST00000377049
1	10509971	10510379	+	protein_coding	ENSG00000241563	CORT	ENST00000320498
1	10532380	10532583	-	protein_coding	ENSG00000160049	DFFA	ENST00000377038
1	10532380	10532545	-	protein_coding	ENSG00000160049	DFFA	ENST00000377036
1	10534944	10535059	+	protein_coding	ENSG00000142655	PEX14	ENST00000356607
1	10535008	10535059	+	protein_coding	ENSG00000142655	PEX14	ENST00000538836
1	10535039	10535059	+	protein_coding	ENSG00000142655	PEX14	ENST00000491661
1	10856621	10856705	-	protein_coding	ENSG00000130940	CASZ1	ENST00000377022
1	10704974	10705133	-	protein_coding	ENSG00000130940	CASZ1	ENST00000447850
1	10856621	10856707	-	protein_coding	ENSG00000130940	CASZ1	ENST00000344008
1	11024185	11024258	-	protein_coding	ENSG00000175262	C1orf127	ENST00000418570
1	11042069	11042094	-	protein_coding	ENSG00000175262	C1orf127	ENST00000377004
1	11042069	11042094	-	protein_coding	ENSG00000175262	C1orf127	ENST00000377008
1	11007700	11007927	-	protein_coding	ENSG00000175262	C1orf127	ENST00000468348
1	11036213	11036272	-	protein_coding	ENSG00000175262	C1orf127	ENST00000520253
1	11072414	11072485	+	protein_coding	ENSG00000120948	TARDBP	ENST00000473118
1	11072699	11072800	+	protein_coding	ENSG00000120948	TARDBP	ENST00000240185
1	11072712	11072800	+	protein_coding	ENSG00000120948	TARDBP	ENST00000476201
1	11072741	11072800	+	protein_coding	ENSG00000120948	TARDBP	ENST00000439080
1	11073773	11074022	+	protein_coding	ENSG00000120948	TARDBP	ENST00000315091
1	11107260	11107280	-	protein_coding	ENSG00000009724	MASP2	ENST00000400897
1	11107260	11107290	-	protein_coding	ENSG00000009724	MASP2	ENST00000400898
1	11119834	11120081	-	protein_coding	ENSG00000116649	SRM	ENST00000376957
1	11115838	11115877	-	protein_coding	ENSG00000116649	SRM	ENST00000490101
1	11118767	11118930	-	protein_coding	ENSG00000116649	SRM	ENST00000465788
1	11119282	11119743	-	protein_coding	ENSG00000116649	SRM	ENST00000487300
1	11159778	11159926	-	protein_coding	ENSG00000171824	EXOSC10	ENST00000304457
1	11159778	11159938	-	protein_coding	ENSG00000171824	EXOSC10	ENST00000376936
1	11159778	11159894	-	protein_coding	ENSG00000171824	EXOSC10	ENST00000544779
1	11190586	11191615	-	protein_coding	ENSG00000198793	MTOR	ENST00000376838
1	11322502	11322564	-	protein_coding	ENSG00000198793	MTOR	ENST00000361445
1	11175453	11175720	-	protein_coding	ENSG00000198793	MTOR	ENST00000455339
1	11249398	11250012	+	protein_coding	ENSG00000171819	ANGPTL7	ENST00000376819
1	11333263	11334117	+	protein_coding	ENSG00000120942	UBIAD1	ENST00000376810
1	11333585	11334117	+	protein_coding	ENSG00000120942	UBIAD1	ENST00000376804
1	11333991	11334117	+	protein_coding	ENSG00000120942	UBIAD1	ENST00000483738
1	11539295	11539429	+	protein_coding	ENSG00000204624	PTCHD2	ENST00000294484
1	11539295	11539429	+	protein_coding	ENSG00000204624	PTCHD2	ENST00000389575
1	11593733	11593884	+	protein_coding	ENSG00000204624	PTCHD2	ENST00000304391
1	11714376	11714739	-	protein_coding	ENSG00000116661	FBXO2	ENST00000354287
1	11715697	11715842	-	protein_coding	ENSG00000116661	FBXO2	ENST00000465901
1	11714432	11714638	+	protein_coding	ENSG00000132879	FBXO44	ENST00000251546
1	11714914	11715009	+	protein_coding	ENSG00000132879	FBXO44	ENST00000425796
1	11714914	11715009	+	protein_coding	ENSG00000132879	FBXO44	ENST00000376770
1	11714938	11715009	+	protein_coding	ENSG00000132879	FBXO44	ENST00000376768
1	11714958	11715009	+	protein_coding	ENSG00000132879	FBXO44	ENST00000251547
1	11714967	11715009	+	protein_coding	ENSG00000132879	FBXO44	ENST00000376760
1	11714967	11715009	+	protein_coding	ENSG00000132879	FBXO44	ENST00000376762
1	11716122	11716157	+	protein_coding	ENSG00000132879	FBXO44	ENST00000475435
1	11718599	11718685	+	protein_coding	ENSG00000132879	FBXO44	ENST00000471895
1	11724181	11724312	+	protein_coding	ENSG00000116663	FBXO6	ENST00000376753
1	11728753	11729001	+	protein_coding	ENSG00000116663	FBXO6	ENST00000449067
1	11751470	11751707	-	protein_coding	ENSG00000116670	MAD2L2	ENST00000235310
1	11741096	11741271	-	protein_coding	ENSG00000116670	MAD2L2	ENST00000376692
1	11751470	11751534	-	protein_coding	ENSG00000116670	MAD2L2	ENST00000376672
1	11741096	11741175	-	protein_coding	ENSG00000116670	MAD2L2	ENST00000376669
1	11751470	11751666	-	protein_coding	ENSG00000116670	MAD2L2	ENST00000376667
1	11741096	11741168	-	protein_coding	ENSG00000116670	MAD2L2	ENST00000445656
1	11740619	11741188	-	protein_coding	ENSG00000116670	MAD2L2	ENST00000456915
1	11751786	11751910	+	protein_coding	ENSG00000162490	DRAXIN	ENST00000294485
1	11796141	11796292	+	protein_coding	ENSG00000177674	AGTRAP	ENST00000376637
1	11796181	11796292	+	protein_coding	ENSG00000177674	AGTRAP	ENST00000400895
1	11796204	11796292	+	protein_coding	ENSG00000177674	AGTRAP	ENST00000376629
1	11796210	11796292	+	protein_coding	ENSG00000177674	AGTRAP	ENST00000376627
1	11796212	11796292	+	protein_coding	ENSG00000177674	AGTRAP	ENST00000314340
1	11796230	11796292	+	protein_coding	ENSG00000177674	AGTRAP	ENST00000452018
1	11796232	11796292	+	protein_coding	ENSG00000177674	AGTRAP	ENST00000510878
1	11821844	11822331	+	protein_coding	ENSG00000215910	C1orf167	ENST00000433342
1	11824462	11824527	+	protein_coding	ENSG00000215910	C1orf167	ENST00000435090
1	11832179	11832316	+	protein_coding	ENSG00000215910	C1orf167	ENST00000312793
1	11838988	11839137	+	protein_coding	ENSG00000215910	C1orf167	ENST00000444493
1	11839874	11840067	+	protein_coding	ENSG00000215910	C1orf167	ENST00000449278
1	11862938	11863302	-	protein_coding	ENSG00000177000	MTHFR	ENST00000376592
1	11863462	11863571	-	protein_coding	ENSG00000177000	MTHFR	ENST00000376583
1	11865945	11866115	-	protein_coding	ENSG00000177000	MTHFR	ENST00000376590
1	11865437	11865470	-	protein_coding	ENSG00000177000	MTHFR	ENST00000376585
1	11865404	11865993	-	protein_coding	ENSG00000177000	MTHFR	ENST00000418034
1	11865056	11865351	-	protein_coding	ENSG00000177000	MTHFR	ENST00000413656
1	11865437	11865470	-	protein_coding	ENSG00000177000	MTHFR	ENST00000423400
1	11865437	11865470	-	protein_coding	ENSG00000177000	MTHFR	ENST00000431243
1	11865945	11866977	-	protein_coding	ENSG00000177000	MTHFR	ENST00000376486
1	11866207	11866406	+	protein_coding	ENSG00000011021	CLCN6	ENST00000312413
1	11866268	11866406	+	protein_coding	ENSG00000011021	CLCN6	ENST00000346436
1	11866270	11866406	+	protein_coding	ENSG00000011021	CLCN6	ENST00000376497
1	11866298	11866406	+	protein_coding	ENSG00000011021	CLCN6	ENST00000376487
1	11866317	11866406	+	protein_coding	ENSG00000011021	CLCN6	ENST00000376496
1	11907619	11907840	-	protein_coding	ENSG00000175206	NPPA	ENST00000376480
1	11908138	11908402	-	protein_coding	ENSG00000175206	NPPA	ENST00000376476
1	11918759	11918988	-	protein_coding	ENSG00000120937	NPPB	ENST00000376468
1	11985262	11986480	-	protein_coding	ENSG00000116685	KIAA2013	ENST00000376572
1	11985262	11986485	-	protein_coding	ENSG00000116685	KIAA2013	ENST00000376576
1	11994751	11994912	+	protein_coding	ENSG00000083444	PLOD1	ENST00000449038
1	11994792	11994912	+	protein_coding	ENSG00000083444	PLOD1	ENST00000376369
1	11994800	11994912	+	protein_coding	ENSG00000083444	PLOD1	ENST00000429000
1	11994810	11994912	+	protein_coding	ENSG00000083444	PLOD1	ENST00000196061
1	12040238	12040541	+	protein_coding	ENSG00000116688	MFN2	ENST00000444836
1	12040369	12040541	+	protein_coding	ENSG00000116688	MFN2	ENST00000235329
1	12042049	12042171	+	protein_coding	ENSG00000116688	MFN2	ENST00000412236
1	12079523	12079609	+	protein_coding	ENSG00000116691	MIIP	ENST00000235332
1	12079590	12079609	+	protein_coding	ENSG00000116691	MIIP	ENST00000436478
1	12123434	12123718	+	protein_coding	ENSG00000120949	TNFRSF8	ENST00000263932
1	12123527	12123718	+	protein_coding	ENSG00000120949	TNFRSF8	ENST00000417814
1	12185956	12186109	+	protein_coding	ENSG00000120949	TNFRSF8	ENST00000413146
1	12227060	12227226	+	protein_coding	ENSG00000028137	TNFRSF1B	ENST00000376259
1	12227060	12227226	+	protein_coding	ENSG00000028137	TNFRSF1B	ENST00000536782
1	12290124	12290177	+	protein_coding	ENSG00000048707	VPS13D	ENST00000358136
1	12290124	12290177	+	protein_coding	ENSG00000048707	VPS13D	ENST00000356315
1	12337178	12338095	+	protein_coding	ENSG00000048707	VPS13D	ENST00000011700
1	12469924	12469947	+	protein_coding	ENSG00000048707	VPS13D	ENST00000543766
1	12524995	12525304	+	protein_coding	ENSG00000048707	VPS13D	ENST00000471923
1	12538604	12538928	+	protein_coding	ENSG00000048707	VPS13D	ENST00000543710
1	12677159	12677737	-	protein_coding	ENSG00000162496	DHRS3	ENST00000376223
1	12655999	12656321	-	protein_coding	ENSG00000162496	DHRS3	ENST00000430996
1	12704566	12704733	+	protein_coding	ENSG00000204518	AADACL4	ENST00000376221
1	12776118	12776347	+	protein_coding	ENSG00000188984	AADACL3	ENST00000332530
1	12776146	12776347	+	protein_coding	ENSG00000188984	AADACL3	ENST00000359318
1	12806163	12806489	+	protein_coding	ENSG00000157330	C1orf158	ENST00000288048
1	12806373	12806489	+	protein_coding	ENSG00000157330	C1orf158	ENST00000376210
1	12834984	12835297	+	protein_coding	ENSG00000116726	PRAMEF12	ENST00000357726
1	12851546	12851623	+	protein_coding	ENSG00000116721	PRAMEF1	ENST00000332296
1	12854840	12855118	+	protein_coding	ENSG00000116721	PRAMEF1	ENST00000400814
1	12891210	12891264	-	protein_coding	ENSG00000204513	PRAMEF11	ENST00000535591
1	12891210	12891264	-	protein_coding	ENSG00000204513	PRAMEF11	ENST00000437584
1	12908534	12908578	-	protein_coding	ENSG00000179172	HNRNPCL1	ENST00000317869
1	12916941	12917002	+	protein_coding	ENSG00000120952	PRAMEF2	ENST00000240189
1	12945971	12946025	-	protein_coding	ENSG00000243073	PRAMEF4	ENST00000235349
1	12958047	12958101	-	protein_coding	ENSG00000187545	PRAMEF10	ENST00000235347
1	12976450	12976507	+	protein_coding	ENSG00000204510	PRAMEF7	ENST00000361079
1	12977513	12977799	+	protein_coding	ENSG00000204510	PRAMEF7	ENST00000330881
1	13007343	13007420	-	protein_coding	ENSG00000232423	PRAMEF6	ENST00000376189
1	13005183	13005246	-	protein_coding	ENSG00000232423	PRAMEF6	ENST00000415464
1	13117674	13117736	-	protein_coding	ENSG00000232423	PRAMEF6	ENST00000376192
1	13002062	13002348	-	protein_coding	ENSG00000232423	PRAMEF6	ENST00000355096
1	13117674	13117751	-	protein_coding	ENSG00000232423	PRAMEF6	ENST00000376182
1	13115515	13115578	-	protein_coding	ENSG00000232423	PRAMEF6	ENST00000414205
1	13035543	13035835	+	protein_coding	ENSG00000204508	PRAMEF22	ENST00000376187
1	13052394	13052998	-	protein_coding	ENSG00000239810	WI2-3308P17.2	ENST00000436041
1	13219000	13219581	-	protein_coding	ENSG00000229571	PRAMEF26	ENST00000423177
1	13331379	13331692	-	protein_coding	ENSG00000204503	PRAMEF3	ENST00000353410
1	13331379	13331692	-	protein_coding	ENSG00000204503	PRAMEF3	ENST00000376173
1	13359819	13359896	+	protein_coding	ENSG00000204502	PRAMEF5	ENST00000376168
1	13390708	13390765	-	protein_coding	ENSG00000182330	PRAMEF8	ENST00000357367
1	13421176	13421253	+	protein_coding	ENSG00000204501	PRAMEF9	ENST00000376152
1	13452579	13452656	-	protein_coding	ENSG00000204495	PRAMEF13	ENST00000376132
1	13477236	13477522	-	protein_coding	ENSG00000204491	PRAMEF18	ENST00000376126
1	13495254	13495570	+	protein_coding	ENSG00000204488	PRAMEF16	ENST00000376121
1	13516066	13516160	+	protein_coding	ENSG00000204486	PRAMEF21	ENST00000332192
1	13521973	13522259	+	protein_coding	ENSG00000204486	PRAMEF21	ENST00000327795
1	13641973	13642050	+	protein_coding	ENSG00000157358	PRAMEF15	ENST00000330087
1	13673434	13673511	-	protein_coding	ENSG00000204481	PRAMEF14	ENST00000344998
1	13673434	13673511	-	protein_coding	ENSG00000204481	PRAMEF14	ENST00000334600
1	13698072	13698405	-	protein_coding	ENSG00000204480	PRAMEF19	ENST00000540591
1	13698072	13698151	-	protein_coding	ENSG00000204480	PRAMEF19	ENST00000376101
1	13716092	13716404	+	protein_coding	ENSG00000204479	PRAMEF17	ENST00000376098
1	13736907	13737001	+	protein_coding	ENSG00000204478	PRAMEF20	ENST00000316412
1	13742808	13743098	+	protein_coding	ENSG00000204478	PRAMEF20	ENST00000602960
1	13839458	13840543	-	protein_coding	ENSG00000162494	LRRC38	ENST00000376085
1	13909960	13910595	+	protein_coding	ENSG00000162493	PDPN	ENST00000294489
1	13910257	13910595	+	protein_coding	ENSG00000162493	PDPN	ENST00000376057
1	13910328	13910595	+	protein_coding	ENSG00000162493	PDPN	ENST00000510906
1	13910588	13910683	+	protein_coding	ENSG00000162493	PDPN	ENST00000509009
1	13910762	13910836	+	protein_coding	ENSG00000162493	PDPN	ENST00000376061
1	13910765	13910836	+	protein_coding	ENSG00000162493	PDPN	ENST00000513143
1	13911956	13912134	+	protein_coding	ENSG00000162493	PDPN	ENST00000487038
1	13911967	13912063	+	protein_coding	ENSG00000162493	PDPN	ENST00000475043
1	14026693	14026795	+	protein_coding	ENSG00000116731	PRDM2	ENST00000484063
1	14026735	14026795	+	protein_coding	ENSG00000116731	PRDM2	ENST00000376048
1	14031350	14032140	+	protein_coding	ENSG00000116731	PRDM2	ENST00000235372
1	14031350	14032140	+	protein_coding	ENSG00000116731	PRDM2	ENST00000311066
1	14075898	14075982	+	protein_coding	ENSG00000116731	PRDM2	ENST00000413440
1	14075910	14075982	+	protein_coding	ENSG00000116731	PRDM2	ENST00000343137
1	14075930	14075982	+	protein_coding	ENSG00000116731	PRDM2	ENST00000503842
1	14075931	14075982	+	protein_coding	ENSG00000116731	PRDM2	ENST00000407521
1	14075931	14075982	+	protein_coding	ENSG00000116731	PRDM2	ENST00000505823
1	14098221	14098709	+	protein_coding	ENSG00000116731	PRDM2	ENST00000487453
1	14925200	14925719	+	protein_coding	ENSG00000189337	KAZN	ENST00000376030
1	14925213	14925406	+	protein_coding	ENSG00000189337	KAZN	ENST00000503743
1	14925213	14925719	+	protein_coding	ENSG00000189337	KAZN	ENST00000422387
1	15250626	15251068	+	protein_coding	ENSG00000189337	KAZN	ENST00000361144
1	15256296	15256540	+	protein_coding	ENSG00000189337	KAZN	ENST00000376028
1	15256296	15256540	+	protein_coding	ENSG00000189337	KAZN	ENST00000400798
1	15272415	15272669	+	protein_coding	ENSG00000189337	KAZN	ENST00000400797
1	15479028	15479280	+	protein_coding	ENSG00000171729	TMEM51	ENST00000428417
1	15479062	15479280	+	protein_coding	ENSG00000171729	TMEM51	ENST00000376014
1	15479073	15479280	+	protein_coding	ENSG00000171729	TMEM51	ENST00000451326
1	15480229	15480450	+	protein_coding	ENSG00000171729	TMEM51	ENST00000400796
1	15480264	15480450	+	protein_coding	ENSG00000171729	TMEM51	ENST00000434578
1	15480285	15480450	+	protein_coding	ENSG00000171729	TMEM51	ENST00000376008
1	15497677	15497774	-	protein_coding	ENSG00000204464	C1orf195	ENST00000424792
1	15497677	15497813	-	protein_coding	ENSG00000204464	C1orf195	ENST00000376005
1	15573768	15573891	+	protein_coding	ENSG00000142621	FHAD1	ENST00000358897
1	15573768	15573891	+	protein_coding	ENSG00000142621	FHAD1	ENST00000417793
1	15573768	15573891	+	protein_coding	ENSG00000142621	FHAD1	ENST00000375999
1	15573776	15573891	+	protein_coding	ENSG00000142621	FHAD1	ENST00000433640
1	15578281	15578373	+	protein_coding	ENSG00000142621	FHAD1	ENST00000375998
1	15632258	15632315	+	protein_coding	ENSG00000142621	FHAD1	ENST00000375997
1	15632265	15632315	+	protein_coding	ENSG00000142621	FHAD1	ENST00000524761
1	15632276	15632315	+	protein_coding	ENSG00000142621	FHAD1	ENST00000375995
1	15632283	15632315	+	protein_coding	ENSG00000142621	FHAD1	ENST00000401090
1	15668257	15668384	+	protein_coding	ENSG00000142621	FHAD1	ENST00000444385
1	15671594	15671686	+	protein_coding	ENSG00000142621	FHAD1	ENST00000529606
1	15671594	15671686	+	protein_coding	ENSG00000142621	FHAD1	ENST00000314740
1	15671927	15672019	+	protein_coding	ENSG00000142621	FHAD1	ENST00000314668
1	15736391	15736775	+	protein_coding	ENSG00000142634	EFHD2	ENST00000375980
1	15736761	15736775	+	protein_coding	ENSG00000142634	EFHD2	ENST00000445566
1	15764935	15765000	+	protein_coding	ENSG00000162438	CTRC	ENST00000375949
1	15764938	15765000	+	protein_coding	ENSG00000162438	CTRC	ENST00000375943
1	15783224	15783288	+	protein_coding	ENSG00000142615	CELA2A	ENST00000359621
1	15802596	15802660	+	protein_coding	ENSG00000215704	CELA2B	ENST00000375910
1	15802960	15803040	+	protein_coding	ENSG00000215704	CELA2B	ENST00000422901
1	15850564	15850940	-	protein_coding	ENSG00000132906	CASP9	ENST00000546424
1	15850564	15850790	-	protein_coding	ENSG00000132906	CASP9	ENST00000333868
1	15850564	15850842	-	protein_coding	ENSG00000132906	CASP9	ENST00000348549
1	15833394	15833547	-	protein_coding	ENSG00000132906	CASP9	ENST00000424908
1	15851078	15851221	-	protein_coding	ENSG00000132906	CASP9	ENST00000375890
1	15851347	15851384	-	protein_coding	ENSG00000132906	CASP9	ENST00000447522
1	15850564	15850712	-	protein_coding	ENSG00000132906	CASP9	ENST00000440484
1	15853308	15853453	+	protein_coding	ENSG00000116138	DNAJC16	ENST00000375838
1	15853308	15853453	+	protein_coding	ENSG00000116138	DNAJC16	ENST00000375847
1	15853308	15853453	+	protein_coding	ENSG00000116138	DNAJC16	ENST00000375849
1	15911191	15911605	-	protein_coding	ENSG00000116771	AGMAT	ENST00000375826
1	15943995	15944303	+	protein_coding	ENSG00000197312	DDI2	ENST00000480945
1	15986364	15988217	+	protein_coding	ENSG00000215695	RSC1A1	ENST00000345034
1	16010827	16011113	+	protein_coding	ENSG00000116786	PLEKHM2	ENST00000375799
1	16010885	16011113	+	protein_coding	ENSG00000116786	PLEKHM2	ENST00000375793
1	16062900	16063358	+	protein_coding	ENSG00000162461	SLC25A34	ENST00000294454
1	16068917	16069142	+	protein_coding	ENSG00000162460	TMEM82	ENST00000375782
1	16083102	16083227	+	protein_coding	ENSG00000162458	FBLIM1	ENST00000496928
1	16083112	16083227	+	protein_coding	ENSG00000162458	FBLIM1	ENST00000508310
1	16083136	16083223	+	protein_coding	ENSG00000162458	FBLIM1	ENST00000510393
1	16083139	16083227	+	protein_coding	ENSG00000162458	FBLIM1	ENST00000430076
1	16083154	16083227	+	protein_coding	ENSG00000162458	FBLIM1	ENST00000375771
1	16084441	16084538	+	protein_coding	ENSG00000162458	FBLIM1	ENST00000510929
1	16084442	16084538	+	protein_coding	ENSG00000162458	FBLIM1	ENST00000502638
1	16084914	16085343	+	protein_coding	ENSG00000162458	FBLIM1	ENST00000375766
1	16085255	16085343	+	protein_coding	ENSG00000162458	FBLIM1	ENST00000400773
1	16085279	16085343	+	protein_coding	ENSG00000162458	FBLIM1	ENST00000483633
1	16085288	16085343	+	protein_coding	ENSG00000162458	FBLIM1	ENST00000502739
1	16085292	16085343	+	protein_coding	ENSG00000162458	FBLIM1	ENST00000431771
1	16090994	16091180	+	protein_coding	ENSG00000162458	FBLIM1	ENST00000441801
1	16091448	16091728	+	protein_coding	ENSG00000162458	FBLIM1	ENST00000332305
1	16174359	16174645	+	protein_coding	ENSG00000065526	SPEN	ENST00000375759
1	16199997	16200890	+	protein_coding	ENSG00000065526	SPEN	ENST00000438066
1	16203071	16203173	+	protein_coding	ENSG00000065526	SPEN	ENST00000442985
1	16269559	16269584	-	protein_coding	ENSG00000116809	ZBTB17	ENST00000440560
1	16302478	16302621	-	protein_coding	ENSG00000116809	ZBTB17	ENST00000375743
1	16302478	16302627	-	protein_coding	ENSG00000116809	ZBTB17	ENST00000375733
1	16302478	16302574	-	protein_coding	ENSG00000116809	ZBTB17	ENST00000537142
1	16270795	16270923	-	protein_coding	ENSG00000116809	ZBTB17	ENST00000444358
1	16302478	16302584	-	protein_coding	ENSG00000116809	ZBTB17	ENST00000448462
1	16330731	16330880	+	protein_coding	ENSG00000183888	C1orf64	ENST00000329454
1	16344260	16344536	-	protein_coding	ENSG00000173641	HSPB7	ENST00000411503
1	16344260	16345285	-	protein_coding	ENSG00000173641	HSPB7	ENST00000311890
1	16345629	16346089	-	protein_coding	ENSG00000173641	HSPB7	ENST00000375718
1	16344260	16344320	-	protein_coding	ENSG00000173641	HSPB7	ENST00000463576
1	16344260	16344568	-	protein_coding	ENSG00000173641	HSPB7	ENST00000487046
1	16344260	16344500	-	protein_coding	ENSG00000173641	HSPB7	ENST00000406363
1	16344082	16344538	-	protein_coding	ENSG00000173641	HSPB7	ENST00000545268
1	16348366	16348413	+	protein_coding	ENSG00000186510	CLCNKA	ENST00000375692
1	16348486	16348558	+	protein_coding	ENSG00000186510	CLCNKA	ENST00000420078
1	16348509	16348558	+	protein_coding	ENSG00000186510	CLCNKA	ENST00000439316
1	16348547	16348558	+	protein_coding	ENSG00000186510	CLCNKA	ENST00000331433
1	16370272	16370375	+	protein_coding	ENSG00000184908	CLCNKB	ENST00000375679
1	16375284	16375740	+	protein_coding	ENSG00000184908	CLCNKB	ENST00000375667
1	16378818	16378906	+	protein_coding	ENSG00000184908	CLCNKB	ENST00000431772
1	16399916	16400121	-	protein_coding	ENSG00000185519	FAM131C	ENST00000375662
1	16482343	16482582	-	protein_coding	ENSG00000142627	EPHA2	ENST00000358432
1	16538997	16539104	-	protein_coding	ENSG00000142632	ARHGEF19	ENST00000270747
1	16532675	16533038	-	protein_coding	ENSG00000142632	ARHGEF19	ENST00000449495
1	16532675	16533021	-	protein_coding	ENSG00000142632	ARHGEF19	ENST00000441785
1	16555978	16556038	-	protein_coding	ENSG00000204377	C1orf134	ENST00000375605
1	16563126	16563657	-	protein_coding	ENSG00000132881	RSG1	ENST00000375599
1	16563126	16563154	-	protein_coding	ENSG00000132881	RSG1	ENST00000434014
1	16678750	16678949	-	protein_coding	ENSG00000037637	FBXO42	ENST00000375592
1	16579591	16579922	-	protein_coding	ENSG00000037637	FBXO42	ENST00000456164
1	16580051	16580088	-	protein_coding	ENSG00000037637	FBXO42	ENST00000444116
1	16693578	16693803	+	protein_coding	ENSG00000055070	SZRD1	ENST00000401088
1	16693583	16693803	+	protein_coding	ENSG00000055070	SZRD1	ENST00000471507
1	16693720	16693803	+	protein_coding	ENSG00000055070	SZRD1	ENST00000401089
1	16693738	16693803	+	protein_coding	ENSG00000055070	SZRD1	ENST00000375590
1	16693760	16693803	+	protein_coding	ENSG00000055070	SZRD1	ENST00000492354
1	16730463	16730469	-	protein_coding	ENSG00000187144	SPATA21	ENST00000491418
1	16763623	16763919	-	protein_coding	ENSG00000187144	SPATA21	ENST00000335496
1	16763623	16763685	-	protein_coding	ENSG00000187144	SPATA21	ENST00000540400
1	16763623	16763911	-	protein_coding	ENSG00000187144	SPATA21	ENST00000375577
1	16767167	16767348	+	protein_coding	ENSG00000157191	NECAP2	ENST00000337132
1	16767216	16767348	+	protein_coding	ENSG00000157191	NECAP2	ENST00000504551
1	16767219	16767270	+	protein_coding	ENSG00000157191	NECAP2	ENST00000457722
1	16767219	16767348	+	protein_coding	ENSG00000157191	NECAP2	ENST00000406746
1	16767231	16767348	+	protein_coding	ENSG00000157191	NECAP2	ENST00000443980
1	16865561	16866070	+	protein_coding	ENSG00000268674	FAM231B	ENST00000601199
1	16939833	16939982	-	protein_coding	ENSG00000219481	NBPF1	ENST00000430580
1	16905688	16905862	-	protein_coding	ENSG00000219481	NBPF1	ENST00000432949
1	16900982	16901051	-	protein_coding	ENSG00000219481	NBPF1	ENST00000420031
1	16902762	16902975	-	protein_coding	ENSG00000219481	NBPF1	ENST00000287968
1	16999498	17000007	+	protein_coding	ENSG00000237847	FAM231A	ENST00000434336
1	17060447	17060956	-	protein_coding	ENSG00000268991	FAM231C	ENST00000600179
1	17248445	17248573	+	protein_coding	ENSG00000058453	CROCC	ENST00000375541
1	17249250	17249293	+	protein_coding	ENSG00000058453	CROCC	ENST00000445545
1	17304732	17304771	-	protein_coding	ENSG00000117122	MFAP2	ENST00000375534
1	17307082	17307330	-	protein_coding	ENSG00000117122	MFAP2	ENST00000375535
1	17307082	17307173	-	protein_coding	ENSG00000117122	MFAP2	ENST00000438542
1	17338224	17338267	-	protein_coding	ENSG00000159363	ATP13A2	ENST00000326735
1	17338224	17338410	-	protein_coding	ENSG00000159363	ATP13A2	ENST00000341676
1	17338224	17338423	-	protein_coding	ENSG00000159363	ATP13A2	ENST00000452699
1	17316382	17316498	-	protein_coding	ENSG00000159363	ATP13A2	ENST00000502418
1	17322749	17322778	-	protein_coding	ENSG00000159363	ATP13A2	ENST00000503552
1	17326741	17326807	-	protein_coding	ENSG00000159363	ATP13A2	ENST00000506174
1	17332179	17332209	-	protein_coding	ENSG00000159363	ATP13A2	ENST00000510069
1	17331509	17331567	-	protein_coding	ENSG00000159363	ATP13A2	ENST00000511957
1	17331869	17331890	-	protein_coding	ENSG00000159363	ATP13A2	ENST00000508222
1	17332179	17332260	-	protein_coding	ENSG00000159363	ATP13A2	ENST00000509619
1	17380443	17380665	-	protein_coding	ENSG00000117118	SDHB	ENST00000375499
1	17445775	17445930	-	protein_coding	ENSG00000117115	PADI2	ENST00000375486
1	17445775	17445948	-	protein_coding	ENSG00000117115	PADI2	ENST00000444885
1	17445775	17445930	-	protein_coding	ENSG00000117115	PADI2	ENST00000375481
1	17531621	17531804	+	protein_coding	ENSG00000142623	PADI1	ENST00000375471
1	17559776	17559933	+	protein_coding	ENSG00000142623	PADI1	ENST00000537499
1	17559778	17559933	+	protein_coding	ENSG00000142623	PADI1	ENST00000413717
1	17559850	17559933	+	protein_coding	ENSG00000142623	PADI1	ENST00000536552
1	17575593	17575724	+	protein_coding	ENSG00000142619	PADI3	ENST00000375460
1	17634690	17634809	+	protein_coding	ENSG00000159339	PADI4	ENST00000375453
1	17634692	17634809	+	protein_coding	ENSG00000159339	PADI4	ENST00000375448
1	17675982	17676070	-	protein_coding	ENSG00000269468	AC004824.2	ENST00000602074
1	17766041	17766220	-	protein_coding	ENSG00000179051	RCC2	ENST00000375436
1	17764726	17765057	-	protein_coding	ENSG00000179051	RCC2	ENST00000375433
1	17866330	17866445	+	protein_coding	ENSG00000074964	ARHGEF10L	ENST00000361221
1	17866330	17866445	+	protein_coding	ENSG00000074964	ARHGEF10L	ENST00000452522
1	17866330	17866445	+	protein_coding	ENSG00000074964	ARHGEF10L	ENST00000434513
1	17907048	17907127	+	protein_coding	ENSG00000074964	ARHGEF10L	ENST00000375415
1	17914911	17914974	+	protein_coding	ENSG00000074964	ARHGEF10L	ENST00000375420
1	17944811	17945017	+	protein_coding	ENSG00000074964	ARHGEF10L	ENST00000375408
1	17944849	17945017	+	protein_coding	ENSG00000074964	ARHGEF10L	ENST00000167825
1	18081808	18081999	+	protein_coding	ENSG00000117148	ACTL8	ENST00000375406
1	18434240	18434692	+	protein_coding	ENSG00000117154	IGSF21	ENST00000251296
1	18605339	18605378	+	protein_coding	ENSG00000117154	IGSF21	ENST00000412684
1	18807424	18812478	+	protein_coding	ENSG00000179023	KLHDC7A	ENST00000400664
1	18957500	18958182	+	protein_coding	ENSG00000009709	PAX7	ENST00000375375
1	18958015	18958182	+	protein_coding	ENSG00000009709	PAX7	ENST00000420770
1	18958018	18958182	+	protein_coding	ENSG00000009709	PAX7	ENST00000400661
1	19185973	19186176	-	protein_coding	ENSG00000179002	TAS1R2	ENST00000375371
1	19228956	19229047	-	protein_coding	ENSG00000159423	ALDH4A1	ENST00000290597
1	19228956	19229275	-	protein_coding	ENSG00000159423	ALDH4A1	ENST00000375341
1	19228956	19229022	-	protein_coding	ENSG00000159423	ALDH4A1	ENST00000538839
1	19217188	19217385	-	protein_coding	ENSG00000159423	ALDH4A1	ENST00000538309
1	19228956	19229218	-	protein_coding	ENSG00000159423	ALDH4A1	ENST00000432718
1	19282162	19283180	-	protein_coding	ENSG00000169991	IFFO2	ENST00000455833
1	19238457	19238486	-	protein_coding	ENSG00000169991	IFFO2	ENST00000355609
1	19282162	19282192	-	protein_coding	ENSG00000169991	IFFO2	ENST00000416166
1	19536567	19536770	-	protein_coding	ENSG00000127481	UBR4	ENST00000375254
1	19536567	19536746	-	protein_coding	ENSG00000127481	UBR4	ENST00000375267
1	19536567	19536746	-	protein_coding	ENSG00000127481	UBR4	ENST00000375217
1	19536567	19536746	-	protein_coding	ENSG00000127481	UBR4	ENST00000375226
1	19407843	19408734	-	protein_coding	ENSG00000127481	UBR4	ENST00000375225
1	19431079	19431410	-	protein_coding	ENSG00000127481	UBR4	ENST00000375224
1	19426091	19426149	-	protein_coding	ENSG00000127481	UBR4	ENST00000429347
1	19428014	19428121	-	protein_coding	ENSG00000127481	UBR4	ENST00000543981
1	19444317	19445343	-	protein_coding	ENSG00000127481	UBR4	ENST00000375218
1	19478137	19478194	-	protein_coding	ENSG00000127481	UBR4	ENST00000425413
1	19494521	19494549	-	protein_coding	ENSG00000127481	UBR4	ENST00000417040
1	19577909	19578046	-	protein_coding	ENSG00000127463	EMC1	ENST00000477853
1	19577909	19578003	-	protein_coding	ENSG00000127463	EMC1	ENST00000375199
1	19577909	19578016	-	protein_coding	ENSG00000127463	EMC1	ENST00000375208
1	19549890	19550000	-	protein_coding	ENSG00000127463	EMC1	ENST00000486405
1	19577909	19578021	-	protein_coding	ENSG00000127463	EMC1	ENST00000356068
1	19578033	19578357	+	protein_coding	ENSG00000053372	MRTO4	ENST00000330263
1	19600355	19600568	-	polymorphic_pseudogene	ENSG00000211454	AKR7L	ENST00000420396
1	19614990	19615744	-	protein_coding	ENSG00000162482	AKR7A3	ENST00000361640
1	19638321	19638640	-	protein_coding	ENSG00000053371	AKR7A2	ENST00000235835
1	19638321	19638588	-	protein_coding	ENSG00000053371	AKR7A2	ENST00000330072
1	19638321	19638401	-	protein_coding	ENSG00000053371	AKR7A2	ENST00000489286
1	19638820	19638852	+	protein_coding	ENSG00000040487	PQLC2	ENST00000375155
1	19638822	19639383	+	protein_coding	ENSG00000040487	PQLC2	ENST00000375153
1	19638835	19638852	+	protein_coding	ENSG00000040487	PQLC2	ENST00000400548
1	19651248	19651256	+	protein_coding	ENSG00000040487	PQLC2	ENST00000432465
1	19811930	19812066	-	protein_coding	ENSG00000077549	CAPZB	ENST00000401084
1	19811930	19812007	-	protein_coding	ENSG00000077549	CAPZB	ENST00000264203
1	19746155	19746245	-	protein_coding	ENSG00000077549	CAPZB	ENST00000375144
1	19811930	19811979	-	protein_coding	ENSG00000077549	CAPZB	ENST00000375142
1	19810684	19811158	-	protein_coding	ENSG00000077549	CAPZB	ENST00000433834
1	19811930	19811981	-	protein_coding	ENSG00000077549	CAPZB	ENST00000264202
1	19810378	19810579	-	protein_coding	ENSG00000077549	CAPZB	ENST00000413711
1	19712215	19712291	-	protein_coding	ENSG00000077549	CAPZB	ENST00000457768
1	19923473	19923603	+	protein_coding	ENSG00000270136	MINOS1-NBL1	ENST00000602662
1	19923561	19923603	+	protein_coding	ENSG00000270136	MINOS1-NBL1	ENST00000602293
1	19923484	19923603	+	protein_coding	ENSG00000173436	MINOS1	ENST00000322753
1	19967048	19967223	+	protein_coding	ENSG00000158747	NBL1	ENST00000428975
1	19969726	19969891	+	protein_coding	ENSG00000158747	NBL1	ENST00000289749
1	19969903	19970119	+	protein_coding	ENSG00000158747	NBL1	ENST00000451758
1	19970208	19970448	+	protein_coding	ENSG00000158747	NBL1	ENST00000439664
1	19970657	19970940	+	protein_coding	ENSG00000158747	NBL1	ENST00000375136
1	19970808	19970940	+	protein_coding	ENSG00000158747	NBL1	ENST00000548815
1	19971866	19972024	+	protein_coding	ENSG00000158747	NBL1	ENST00000425400
1	19972260	19972527	+	protein_coding	ENSG00000158747	NBL1	ENST00000439278
1	19974104	19974164	+	protein_coding	ENSG00000158747	NBL1	ENST00000427894
1	19991780	19992960	+	protein_coding	ENSG00000158748	HTR6	ENST00000289753
1	20126348	20126410	-	protein_coding	ENSG00000162542	TMCO4	ENST00000294543
1	20125667	20125837	-	protein_coding	ENSG00000162542	TMCO4	ENST00000375127
1	20126348	20126410	-	protein_coding	ENSG00000162542	TMCO4	ENST00000375122
1	20140523	20141771	-	protein_coding	ENSG00000178828	RNF186	ENST00000375121
1	20209006	20209227	+	protein_coding	ENSG00000169914	OTUD3	ENST00000375120
1	20250013	20250110	-	protein_coding	ENSG00000188784	PLA2G2E	ENST00000375116
1	20306855	20306932	-	protein_coding	ENSG00000188257	PLA2G2A	ENST00000400520
1	20306855	20306909	-	protein_coding	ENSG00000188257	PLA2G2A	ENST00000375111
1	20396701	20396958	+	protein_coding	ENSG00000127472	PLA2G5	ENST00000375108
1	20445952	20446050	-	protein_coding	ENSG00000117215	PLA2G2D	ENST00000375105
1	20465819	20466036	+	protein_coding	ENSG00000158786	PLA2G2F	ENST00000375102
1	20503817	20503917	-	protein_coding	ENSG00000187980	PLA2G2C	ENST00000429261
1	20501500	20501687	-	protein_coding	ENSG00000187980	PLA2G2C	ENST00000247992
1	20512578	20512646	+	protein_coding	ENSG00000162543	UBXN10	ENST00000375099
1	20617412	20617581	+	protein_coding	ENSG00000158816	VWA5B1	ENST00000375079
1	20617412	20617581	+	protein_coding	ENSG00000158816	VWA5B1	ENST00000289815
1	20617412	20617581	+	protein_coding	ENSG00000158816	VWA5B1	ENST00000375083
1	20617412	20617581	+	protein_coding	ENSG00000158816	VWA5B1	ENST00000289825
1	20629574	20629842	+	protein_coding	ENSG00000158816	VWA5B1	ENST00000530722
1	20629574	20629705	+	protein_coding	ENSG00000158816	VWA5B1	ENST00000534075
1	20811707	20812713	-	protein_coding	ENSG00000162545	CAMK2N1	ENST00000375078
1	20834398	20834654	-	protein_coding	ENSG00000090432	MUL1	ENST00000264198
1	20878932	20881512	+	protein_coding	ENSG00000183114	FAM43B	ENST00000332947
1	20915441	20915776	+	protein_coding	ENSG00000158825	CDA	ENST00000375071
1	20959948	20960428	+	protein_coding	ENSG00000158828	PINK1	ENST00000321556
1	20987690	20987884	-	protein_coding	ENSG00000244038	DDOST	ENST00000602624
1	20987690	20988000	-	protein_coding	ENSG00000244038	DDOST	ENST00000375048
1	20987690	20987898	-	protein_coding	ENSG00000244038	DDOST	ENST00000415136
1	20987690	20987881	-	protein_coding	ENSG00000244038	DDOST	ENST00000464364
1	21043842	21043984	-	protein_coding	ENSG00000117245	KIF17	ENST00000375044
1	21043969	21044273	-	protein_coding	ENSG00000117245	KIF17	ENST00000400463
1	21043969	21044510	-	protein_coding	ENSG00000117245	KIF17	ENST00000247986
1	21058674	21059133	-	protein_coding	ENSG00000189410	SH2D5	ENST00000375031
1	21058674	21059029	-	protein_coding	ENSG00000189410	SH2D5	ENST00000444387
1	21058674	21058771	-	protein_coding	ENSG00000189410	SH2D5	ENST00000447746
1	21059257	21059330	-	protein_coding	ENSG00000189410	SH2D5	ENST00000518294
1	21057941	21058084	-	protein_coding	ENSG00000189410	SH2D5	ENST00000517430
1	21057505	21057668	-	protein_coding	ENSG00000189410	SH2D5	ENST00000519434
1	21113142	21113181	-	protein_coding	ENSG00000127483	HP1BP3	ENST00000312239
1	21099944	21101498	-	protein_coding	ENSG00000127483	HP1BP3	ENST00000375003
1	21103090	21103097	-	protein_coding	ENSG00000127483	HP1BP3	ENST00000419948
1	21113688	21113765	-	protein_coding	ENSG00000127483	HP1BP3	ENST00000438032
1	21113688	21113805	-	protein_coding	ENSG00000127483	HP1BP3	ENST00000424732
1	21112679	21112776	-	protein_coding	ENSG00000127483	HP1BP3	ENST00000417710
1	21113007	21113133	-	protein_coding	ENSG00000127483	HP1BP3	ENST00000375000
1	21113688	21113816	-	protein_coding	ENSG00000127483	HP1BP3	ENST00000437575
1	21112746	21113145	-	protein_coding	ENSG00000127483	HP1BP3	ENST00000419490
1	21112746	21113145	-	protein_coding	ENSG00000127483	HP1BP3	ENST00000414993
1	21112679	21113159	-	protein_coding	ENSG00000127483	HP1BP3	ENST00000443615
1	21377359	21377487	-	protein_coding	ENSG00000075151	EIF4G3	ENST00000264211
1	21503215	21503343	-	protein_coding	ENSG00000075151	EIF4G3	ENST00000602326
1	21503215	21503340	-	protein_coding	ENSG00000075151	EIF4G3	ENST00000400422
1	21377359	21377395	-	protein_coding	ENSG00000075151	EIF4G3	ENST00000374935
1	21226190	21226406	-	protein_coding	ENSG00000075151	EIF4G3	ENST00000537738
1	21377359	21377453	-	protein_coding	ENSG00000075151	EIF4G3	ENST00000374937
1	21299495	21299529	-	protein_coding	ENSG00000075151	EIF4G3	ENST00000536266
1	21267984	21268111	-	protein_coding	ENSG00000075151	EIF4G3	ENST00000544689
1	21501203	21501230	-	protein_coding	ENSG00000075151	EIF4G3	ENST00000356916
1	21415631	21415701	-	protein_coding	ENSG00000075151	EIF4G3	ENST00000374927
1	21503215	21503377	-	protein_coding	ENSG00000075151	EIF4G3	ENST00000438975
1	21503215	21503350	-	protein_coding	ENSG00000075151	EIF4G3	ENST00000411888
1	21671869	21671997	-	protein_coding	ENSG00000117298	ECE1	ENST00000415912
1	21605684	21606042	-	protein_coding	ENSG00000117298	ECE1	ENST00000357071
1	21616857	21616982	-	protein_coding	ENSG00000117298	ECE1	ENST00000374893
1	21616857	21616957	-	protein_coding	ENSG00000117298	ECE1	ENST00000436918
1	21616563	21616750	-	protein_coding	ENSG00000117298	ECE1	ENST00000264205
1	21606324	21606562	-	protein_coding	ENSG00000117298	ECE1	ENST00000473505
1	21625310	21625492	-	protein_coding	ENSG00000117298	ECE1	ENST00000481130
1	21620647	21620917	-	protein_coding	ENSG00000117298	ECE1	ENST00000527991
1	21766621	21766841	+	protein_coding	ENSG00000142794	NBPF3	ENST00000454000
1	21766630	21766841	+	protein_coding	ENSG00000142794	NBPF3	ENST00000318220
1	21766631	21766841	+	protein_coding	ENSG00000142794	NBPF3	ENST00000318249
1	21766657	21766841	+	protein_coding	ENSG00000142794	NBPF3	ENST00000342104
1	21771437	21771712	+	protein_coding	ENSG00000142794	NBPF3	ENST00000434838
1	21835858	21836010	+	protein_coding	ENSG00000162551	ALPL	ENST00000539907
1	21835858	21836010	+	protein_coding	ENSG00000162551	ALPL	ENST00000540617
1	21835865	21836010	+	protein_coding	ENSG00000162551	ALPL	ENST00000374840
1	21877772	21877921	+	protein_coding	ENSG00000162551	ALPL	ENST00000374832
1	21880575	21880635	+	protein_coding	ENSG00000162551	ALPL	ENST00000425315
1	21896796	21896867	+	protein_coding	ENSG00000162551	ALPL	ENST00000374830
1	21900971	21901236	+	protein_coding	ENSG00000162551	ALPL	ENST00000374829
1	21978272	21978348	-	protein_coding	ENSG00000076864	RAP1GAP	ENST00000290101
1	21948832	21948906	-	protein_coding	ENSG00000076864	RAP1GAP	ENST00000374761
1	21946508	21946534	-	protein_coding	ENSG00000076864	RAP1GAP	ENST00000374763
1	21995747	21995799	-	protein_coding	ENSG00000076864	RAP1GAP	ENST00000374765
1	21995747	21995794	-	protein_coding	ENSG00000076864	RAP1GAP	ENST00000542643
1	21978272	21978329	-	protein_coding	ENSG00000076864	RAP1GAP	ENST00000359708
1	21948832	21949011	-	protein_coding	ENSG00000076864	RAP1GAP	ENST00000599760
1	21995747	21995801	-	protein_coding	ENSG00000076864	RAP1GAP	ENST00000317967
1	21979627	21979800	-	protein_coding	ENSG00000076864	RAP1GAP	ENST00000447293
1	22109317	22109688	-	protein_coding	ENSG00000090686	USP48	ENST00000400301
1	22109317	22110099	-	protein_coding	ENSG00000090686	USP48	ENST00000308271
1	22050391	22051612	-	protein_coding	ENSG00000090686	USP48	ENST00000374732
1	22109317	22109484	-	protein_coding	ENSG00000090686	USP48	ENST00000529637
1	22059255	22059329	-	protein_coding	ENSG00000090686	USP48	ENST00000526044
1	22059157	22059319	-	protein_coding	ENSG00000090686	USP48	ENST00000534705
1	22109317	22110099	-	protein_coding	ENSG00000090686	USP48	ENST00000421625
1	22108351	22108513	-	protein_coding	ENSG00000090686	USP48	ENST00000527823
1	22109471	22109719	-	protein_coding	ENSG00000090686	USP48	ENST00000532737
1	22138758	22139029	+	protein_coding	ENSG00000187942	LDLRAD2	ENST00000344642
1	22138856	22139029	+	protein_coding	ENSG00000187942	LDLRAD2	ENST00000543870
1	22263648	22263790	-	protein_coding	ENSG00000142798	HSPG2	ENST00000374695
1	22161172	22161840	-	protein_coding	ENSG00000142798	HSPG2	ENST00000426143
1	22165318	22165499	-	protein_coding	ENSG00000142798	HSPG2	ENST00000374676
1	22174182	22174451	-	protein_coding	ENSG00000142798	HSPG2	ENST00000453796
1	22181797	22181889	-	protein_coding	ENSG00000142798	HSPG2	ENST00000430507
1	22201109	22201199	-	protein_coding	ENSG00000142798	HSPG2	ENST00000427897
1	22222668	22222803	-	protein_coding	ENSG00000142798	HSPG2	ENST00000412328
1	22215161	22215214	-	protein_coding	ENSG00000142798	HSPG2	ENST00000374673
1	22222668	22222764	-	protein_coding	ENSG00000142798	HSPG2	ENST00000439717
1	22303514	22303575	+	protein_coding	ENSG00000219073	CELA3B	ENST00000337107
1	22304386	22304479	+	protein_coding	ENSG00000219073	CELA3B	ENST00000374666
1	22307595	22307665	+	protein_coding	ENSG00000219073	CELA3B	ENST00000400277
1	22328149	22328210	+	protein_coding	ENSG00000142789	CELA3A	ENST00000290122
1	22328153	22328210	+	protein_coding	ENSG00000142789	CELA3A	ENST00000374663
1	22333943	22334008	+	protein_coding	ENSG00000142789	CELA3A	ENST00000400271
1	22379120	22379235	+	protein_coding	ENSG00000070831	CDC42	ENST00000400259
1	22379161	22379235	+	protein_coding	ENSG00000070831	CDC42	ENST00000344548
1	22379182	22379235	+	protein_coding	ENSG00000070831	CDC42	ENST00000315554
1	22379204	22379235	+	protein_coding	ENSG00000070831	CDC42	ENST00000421089
1	22379790	22379926	+	protein_coding	ENSG00000070831	CDC42	ENST00000411827
1	22469339	22469459	-	protein_coding	ENSG00000162552	WNT4	ENST00000290167
1	22470225	22470385	-	protein_coding	ENSG00000162552	WNT4	ENST00000542383
1	22456109	22456344	-	protein_coding	ENSG00000162552	WNT4	ENST00000415567
1	22470225	22470462	-	protein_coding	ENSG00000162552	WNT4	ENST00000441048
1	22778344	22778497	+	protein_coding	ENSG00000184677	ZBTB40	ENST00000404138
1	22778360	22778497	+	protein_coding	ENSG00000184677	ZBTB40	ENST00000400239
1	22778360	22778497	+	protein_coding	ENSG00000184677	ZBTB40	ENST00000375647
1	22778472	22778497	+	protein_coding	ENSG00000184677	ZBTB40	ENST00000374651
1	22890057	22890222	+	protein_coding	ENSG00000070886	EPHA8	ENST00000374644
1	22890057	22890222	+	protein_coding	ENSG00000070886	EPHA8	ENST00000166244
1	22890070	22890123	+	protein_coding	ENSG00000070886	EPHA8	ENST00000538803
1	22962999	22963195	+	protein_coding	ENSG00000173372	C1QA	ENST00000374642
1	22963255	22963353	+	protein_coding	ENSG00000173372	C1QA	ENST00000438241
1	22964073	22964272	+	protein_coding	ENSG00000173372	C1QA	ENST00000402322
1	22970123	22970207	+	protein_coding	ENSG00000159189	C1QC	ENST00000374640
1	22970126	22970230	+	protein_coding	ENSG00000159189	C1QC	ENST00000374639
1	22970146	22970379	+	protein_coding	ENSG00000159189	C1QC	ENST00000374637
1	22979255	22979448	+	protein_coding	ENSG00000173369	C1QB	ENST00000510260
1	22979474	22979796	+	protein_coding	ENSG00000173369	C1QB	ENST00000509305
1	22979682	22979796	+	protein_coding	ENSG00000173369	C1QB	ENST00000432749
1	22979682	22979796	+	protein_coding	ENSG00000173369	C1QB	ENST00000314933
1	23037332	23037536	+	protein_coding	ENSG00000133216	EPHB2	ENST00000544305
1	23037458	23037536	+	protein_coding	ENSG00000133216	EPHB2	ENST00000374630
1	23037458	23037536	+	protein_coding	ENSG00000133216	EPHB2	ENST00000400191
1	23037463	23037536	+	protein_coding	ENSG00000133216	EPHB2	ENST00000374632
1	23101671	23101737	+	protein_coding	ENSG00000133216	EPHB2	ENST00000374627
1	23291783	23291831	-	protein_coding	ENSG00000215906	LACTBL1	ENST00000426928
1	23340376	23340517	-	protein_coding	ENSG00000227868	C1orf234	ENST00000440767
1	23342265	23342343	-	protein_coding	ENSG00000227868	C1orf234	ENST00000566855
1	23345941	23346440	+	protein_coding	ENSG00000004487	KDM1A	ENST00000356634
1	23345986	23346440	+	protein_coding	ENSG00000004487	KDM1A	ENST00000400181
1	23345988	23346440	+	protein_coding	ENSG00000004487	KDM1A	ENST00000542151
1	23398617	23398690	+	protein_coding	ENSG00000004487	KDM1A	ENST00000465864
1	23403727	23403853	+	protein_coding	ENSG00000004487	KDM1A	ENST00000494920
1	23495259	23495351	-	protein_coding	ENSG00000169641	LUZP1	ENST00000418342
1	23435515	23435623	-	protein_coding	ENSG00000169641	LUZP1	ENST00000374623
1	23503984	23504301	-	protein_coding	ENSG00000169641	LUZP1	ENST00000302291
1	23495259	23495310	-	protein_coding	ENSG00000169641	LUZP1	ENST00000314174
1	23495259	23495338	-	protein_coding	ENSG00000169641	LUZP1	ENST00000471849
1	23459958	23460172	-	protein_coding	ENSG00000169641	LUZP1	ENST00000475164
1	23519570	23520755	-	protein_coding	ENSG00000179546	HTR1D	ENST00000314113
1	23518388	23521222	-	protein_coding	ENSG00000179546	HTR1D	ENST00000374619
1	23670704	23670829	-	protein_coding	ENSG00000125944	HNRNPR	ENST00000478691
1	23670704	23670803	-	protein_coding	ENSG00000125944	HNRNPR	ENST00000374616
1	23670704	23670815	-	protein_coding	ENSG00000125944	HNRNPR	ENST00000374612
1	23670704	23670755	-	protein_coding	ENSG00000125944	HNRNPR	ENST00000302271
1	23670704	23670774	-	protein_coding	ENSG00000125944	HNRNPR	ENST00000427764
1	23670704	23670788	-	protein_coding	ENSG00000125944	HNRNPR	ENST00000606561
1	23670704	23670773	-	protein_coding	ENSG00000125944	HNRNPR	ENST00000426846
1	23695859	23695935	-	protein_coding	ENSG00000125945	ZNF436	ENST00000314011
1	23694466	23694879	-	protein_coding	ENSG00000125945	ZNF436	ENST00000374608
1	23695711	23696006	+	protein_coding	ENSG00000249087	C1orf213	ENST00000454117
1	23695729	23698275	+	protein_coding	ENSG00000249087	C1orf213	ENST00000335648
1	23695731	23695817	+	protein_coding	ENSG00000249087	C1orf213	ENST00000518821
1	23695743	23696006	+	protein_coding	ENSG00000249087	C1orf213	ENST00000437367
1	23697637	23697702	+	protein_coding	ENSG00000249087	C1orf213	ENST00000518600
1	23751058	23751233	-	protein_coding	ENSG00000204219	TCEA3	ENST00000450454
1	23713766	23713912	-	protein_coding	ENSG00000204219	TCEA3	ENST00000476978
1	23751058	23751200	-	protein_coding	ENSG00000204219	TCEA3	ENST00000374601
1	23745570	23745879	-	protein_coding	ENSG00000204219	TCEA3	ENST00000461794
1	23763053	23763170	-	protein_coding	ENSG00000088280	ASAP3	ENST00000495646
1	23810498	23810671	-	protein_coding	ENSG00000088280	ASAP3	ENST00000336689
1	23759918	23760025	-	protein_coding	ENSG00000088280	ASAP3	ENST00000465372
1	23810498	23810672	-	protein_coding	ENSG00000088280	ASAP3	ENST00000437606
1	23810965	23811061	-	protein_coding	ENSG00000088280	ASAP3	ENST00000608765
1	23857034	23857712	-	protein_coding	ENSG00000007968	E2F2	ENST00000361729
1	23885618	23886285	-	protein_coding	ENSG00000117318	ID3	ENST00000374561
1	23953824	23954027	+	protein_coding	ENSG00000197880	MDS2	ENST00000374555
1	24018269	24018319	+	protein_coding	ENSG00000142676	RPL11	ENST00000374550
1	24019099	24019249	+	protein_coding	ENSG00000142676	RPL11	ENST00000443624
1	24019099	24019249	+	protein_coding	ENSG00000142676	RPL11	ENST00000458455
1	24069645	24070068	+	protein_coding	ENSG00000011007	TCEB3	ENST00000418390
1	24069962	24070068	+	protein_coding	ENSG00000011007	TCEB3	ENST00000609199
1	24104895	24105203	+	protein_coding	ENSG00000057757	PITHD1	ENST00000246151
1	24105847	24106431	+	protein_coding	ENSG00000057757	PITHD1	ENST00000415372
1	24111682	24111801	+	protein_coding	ENSG00000057757	PITHD1	ENST00000374524
1	24117460	24117740	+	protein_coding	ENSG00000011009	LYPLA2	ENST00000374514
1	24117646	24117740	+	protein_coding	ENSG00000011009	LYPLA2	ENST00000400061
1	24117677	24117740	+	protein_coding	ENSG00000011009	LYPLA2	ENST00000420982
1	24117677	24117740	+	protein_coding	ENSG00000011009	LYPLA2	ENST00000374505
1	24117693	24117740	+	protein_coding	ENSG00000011009	LYPLA2	ENST00000374503
1	24117711	24117740	+	protein_coding	ENSG00000011009	LYPLA2	ENST00000374502
1	24118482	24118507	+	protein_coding	ENSG00000011009	LYPLA2	ENST00000421070
1	24120143	24120242	+	protein_coding	ENSG00000011009	LYPLA2	ENST00000374501
1	24126877	24126892	-	protein_coding	ENSG00000117308	GALE	ENST00000374497
1	24123366	24123432	-	protein_coding	ENSG00000117308	GALE	ENST00000456977
1	24125856	24126023	-	protein_coding	ENSG00000117308	GALE	ENST00000429356
1	24127202	24127260	-	protein_coding	ENSG00000117308	GALE	ENST00000418277
1	24126798	24127013	-	protein_coding	ENSG00000117308	GALE	ENST00000425913
1	24125856	24126060	-	protein_coding	ENSG00000117308	GALE	ENST00000445705
1	24151846	24151949	-	protein_coding	ENSG00000117305	HMGCL	ENST00000374490
1	24151846	24151918	-	protein_coding	ENSG00000117305	HMGCL	ENST00000436439
1	24164554	24165110	-	protein_coding	ENSG00000117305	HMGCL	ENST00000374483
1	24151846	24151892	-	protein_coding	ENSG00000117305	HMGCL	ENST00000235958
1	24194388	24194784	-	protein_coding	ENSG00000179163	FUCA1	ENST00000374479
1	24239736	24239852	-	protein_coding	ENSG00000188822	CNR2	ENST00000374472
1	24285413	24285549	-	protein_coding	ENSG00000188822	CNR2	ENST00000536471
1	24285599	24285746	+	protein_coding	ENSG00000189266	PNRC2	ENST00000471915
1	24286302	24286488	+	protein_coding	ENSG00000189266	PNRC2	ENST00000334351
1	24286318	24286488	+	protein_coding	ENSG00000189266	PNRC2	ENST00000374468
1	24287458	24287624	+	protein_coding	ENSG00000189266	PNRC2	ENST00000579103
1	24306681	24306821	-	protein_coding	ENSG00000188529	SRSF10	ENST00000344989
1	24306681	24306786	-	protein_coding	ENSG00000188529	SRSF10	ENST00000453840
1	24306681	24306846	-	protein_coding	ENSG00000188529	SRSF10	ENST00000484146
1	24306681	24306798	-	protein_coding	ENSG00000188529	SRSF10	ENST00000374452
1	24306681	24306784	-	protein_coding	ENSG00000188529	SRSF10	ENST00000374453
1	24306681	24306817	-	protein_coding	ENSG00000188529	SRSF10	ENST00000343255
1	24306681	24306809	-	protein_coding	ENSG00000188529	SRSF10	ENST00000492112
1	24392597	24393069	-	protein_coding	ENSG00000142661	MYOM3	ENST00000338909
1	24438521	24438665	-	protein_coding	ENSG00000142661	MYOM3	ENST00000374434
1	24438521	24438665	-	protein_coding	ENSG00000142661	MYOM3	ENST00000330966
1	24438521	24438665	-	protein_coding	ENSG00000142661	MYOM3	ENST00000329601
1	24469530	24469611	-	protein_coding	ENSG00000142677	IL22RA1	ENST00000270800
1	24513681	24513751	-	protein_coding	ENSG00000185436	IFNLR1	ENST00000327535
1	24513681	24513751	-	protein_coding	ENSG00000185436	IFNLR1	ENST00000327575
1	24513681	24513738	-	protein_coding	ENSG00000185436	IFNLR1	ENST00000374421
1	24514292	24514449	-	protein_coding	ENSG00000185436	IFNLR1	ENST00000374419
1	24513681	24513738	-	protein_coding	ENSG00000185436	IFNLR1	ENST00000374418
1	24645812	24646058	+	protein_coding	ENSG00000158055	GRHL3	ENST00000361548
1	24645881	24646058	+	protein_coding	ENSG00000158055	GRHL3	ENST00000342072
1	24645915	24646058	+	protein_coding	ENSG00000158055	GRHL3	ENST00000350501
1	24646056	24646237	+	protein_coding	ENSG00000158055	GRHL3	ENST00000356046
1	24646304	24646431	+	protein_coding	ENSG00000158055	GRHL3	ENST00000524724
1	24649530	24649607	+	protein_coding	ENSG00000158055	GRHL3	ENST00000236255
1	24741401	24741587	-	protein_coding	ENSG00000001460	STPG1	ENST00000374409
1	24727809	24727949	-	protein_coding	ENSG00000001460	STPG1	ENST00000440416
1	24740164	24740215	-	protein_coding	ENSG00000001460	STPG1	ENST00000003583
1	24740164	24740230	-	protein_coding	ENSG00000001460	STPG1	ENST00000337248
1	24706143	24706313	-	protein_coding	ENSG00000001460	STPG1	ENST00000438866
1	24718051	24718169	-	protein_coding	ENSG00000001460	STPG1	ENST00000435187
1	24742284	24742394	+	protein_coding	ENSG00000001461	NIPAL3	ENST00000374399
1	24742293	24742394	+	protein_coding	ENSG00000001461	NIPAL3	ENST00000003912
1	24742303	24742394	+	protein_coding	ENSG00000001461	NIPAL3	ENST00000358028
1	24742304	24742394	+	protein_coding	ENSG00000001461	NIPAL3	ENST00000339255
1	24746038	24746130	+	protein_coding	ENSG00000001461	NIPAL3	ENST00000428131
1	24782656	24782763	+	protein_coding	ENSG00000001461	NIPAL3	ENST00000432012
1	24829387	24829640	+	protein_coding	ENSG00000117602	RCAN3	ENST00000374395
1	24829387	24829640	+	protein_coding	ENSG00000117602	RCAN3	ENST00000436717
1	24834057	24834218	+	protein_coding	ENSG00000117602	RCAN3	ENST00000425530
1	24840810	24841057	+	protein_coding	ENSG00000117602	RCAN3	ENST00000412742
1	24840837	24841057	+	protein_coding	ENSG00000117602	RCAN3	ENST00000538532
1	24840863	24841057	+	protein_coding	ENSG00000117602	RCAN3	ENST00000374393
1	24882602	24882660	+	protein_coding	ENSG00000184454	NCMAP	ENST00000374392
1	24967722	24967883	+	protein_coding	ENSG00000133226	SRRM1	ENST00000593639
1	24969503	24969838	+	protein_coding	ENSG00000133226	SRRM1	ENST00000323848
1	24969775	24969838	+	protein_coding	ENSG00000133226	SRRM1	ENST00000447431
1	24969790	24969838	+	protein_coding	ENSG00000133226	SRRM1	ENST00000374389
1	24970050	24970223	+	protein_coding	ENSG00000133226	SRRM1	ENST00000596378
1	24975417	24975520	+	protein_coding	ENSG00000133226	SRRM1	ENST00000537199
1	25071848	25072116	+	protein_coding	ENSG00000169504	CLIC4	ENST00000374379
1	25291005	25291501	-	protein_coding	ENSG00000020633	RUNX3	ENST00000399916
1	25256078	25256368	-	protein_coding	ENSG00000020633	RUNX3	ENST00000308873
1	25291327	25291475	-	protein_coding	ENSG00000020633	RUNX3	ENST00000338888
1	25255531	25255612	-	protein_coding	ENSG00000020633	RUNX3	ENST00000540420
1	25558935	25558984	-	protein_coding	ENSG00000117614	SYF2	ENST00000236273
1	25558935	25558977	-	protein_coding	ENSG00000117614	SYF2	ENST00000354361
1	25573800	25574010	-	protein_coding	ENSG00000117616	C1orf63	ENST00000243189
1	25573800	25573945	-	protein_coding	ENSG00000117616	C1orf63	ENST00000417642
1	25573800	25573945	-	protein_coding	ENSG00000117616	C1orf63	ENST00000431849
1	25594231	25594406	-	protein_coding	ENSG00000117616	C1orf63	ENST00000568701
1	25664469	25664591	-	protein_coding	ENSG00000117616	C1orf63	ENST00000561867
1	25664560	25664704	-	protein_coding	ENSG00000117616	C1orf63	ENST00000568996
1	25598884	25599186	+	protein_coding	ENSG00000187010	RHD	ENST00000328664
1	25598989	25599186	+	protein_coding	ENSG00000187010	RHD	ENST00000454452
1	25599039	25599186	+	protein_coding	ENSG00000187010	RHD	ENST00000417538
1	25599039	25599186	+	protein_coding	ENSG00000187010	RHD	ENST00000357542
1	25599039	25599186	+	protein_coding	ENSG00000187010	RHD	ENST00000568195
1	25599039	25599186	+	protein_coding	ENSG00000187010	RHD	ENST00000342055
1	25599039	25599186	+	protein_coding	ENSG00000187010	RHD	ENST00000423810
1	25664408	25664947	+	protein_coding	ENSG00000183726	TMEM50A	ENST00000374358
1	25747130	25747336	-	protein_coding	ENSG00000188672	RHCE	ENST00000294413
1	25747130	25747363	-	protein_coding	ENSG00000188672	RHCE	ENST00000413854
1	25747130	25747363	-	protein_coding	ENSG00000188672	RHCE	ENST00000455194
1	25737831	25737930	-	protein_coding	ENSG00000188672	RHCE	ENST00000374352
1	25747130	25747363	-	protein_coding	ENSG00000188672	RHCE	ENST00000243186
1	25747130	25747363	-	protein_coding	ENSG00000188672	RHCE	ENST00000425135
1	25747130	25747286	-	protein_coding	ENSG00000188672	RHCE	ENST00000340849
1	25756431	25756683	-	protein_coding	ENSG00000188672	RHCE	ENST00000349320
1	25729087	25729193	-	protein_coding	ENSG00000188672	RHCE	ENST00000527747
1	25747130	25747283	-	protein_coding	ENSG00000188672	RHCE	ENST00000346452
1	25747130	25747296	-	protein_coding	ENSG00000188672	RHCE	ENST00000349438
1	25757388	25757669	+	protein_coding	ENSG00000204178	TMEM57	ENST00000399766
1	25757388	25757669	+	protein_coding	ENSG00000204178	TMEM57	ENST00000399763
1	25757411	25757669	+	protein_coding	ENSG00000204178	TMEM57	ENST00000374343
1	25870071	25870277	+	protein_coding	ENSG00000157978	LDLRAP1	ENST00000374338
1	25943959	25944828	+	protein_coding	ENSG00000117643	MAN1C1	ENST00000374332
1	25944341	25944828	+	protein_coding	ENSG00000117643	MAN1C1	ENST00000263979
1	26036093	26036636	+	protein_coding	ENSG00000117643	MAN1C1	ENST00000374329
1	26126667	26126904	+	protein_coding	ENSG00000162430	SEPN1	ENST00000361547
1	26126667	26126904	+	protein_coding	ENSG00000162430	SEPN1	ENST00000354177
1	26126684	26126904	+	protein_coding	ENSG00000162430	SEPN1	ENST00000374315
1	26145131	26145343	+	protein_coding	ENSG00000117640	MTFR1L	ENST00000424294
1	26146397	26146520	+	protein_coding	ENSG00000117640	MTFR1L	ENST00000374303
1	26146417	26146520	+	protein_coding	ENSG00000117640	MTFR1L	ENST00000533762
1	26146420	26146520	+	protein_coding	ENSG00000117640	MTFR1L	ENST00000529116
1	26146420	26146520	+	protein_coding	ENSG00000117640	MTFR1L	ENST00000474295
1	26146430	26146520	+	protein_coding	ENSG00000117640	MTFR1L	ENST00000488327
1	26146431	26146520	+	protein_coding	ENSG00000117640	MTFR1L	ENST00000472643
1	26146470	26146520	+	protein_coding	ENSG00000117640	MTFR1L	ENST00000526894
1	26146477	26146520	+	protein_coding	ENSG00000117640	MTFR1L	ENST00000524618
1	26146494	26146520	+	protein_coding	ENSG00000117640	MTFR1L	ENST00000374307
1	26146684	26146840	+	protein_coding	ENSG00000117640	MTFR1L	ENST00000525713
1	26146684	26146905	+	protein_coding	ENSG00000117640	MTFR1L	ENST00000374301
1	26146934	26147150	+	protein_coding	ENSG00000117640	MTFR1L	ENST00000526158
1	26147319	26147494	+	protein_coding	ENSG00000117640	MTFR1L	ENST00000374300
1	26148014	26149619	+	protein_coding	ENSG00000117640	MTFR1L	ENST00000466284
1	26145212	26147288	-	protein_coding	ENSG00000223474	AL020996.1	ENST00000536896
1	26185771	26185903	-	protein_coding	ENSG00000127423	AUNIP	ENST00000538789
1	26185771	26185903	-	protein_coding	ENSG00000127423	AUNIP	ENST00000374298
1	26197100	26197744	-	protein_coding	ENSG00000182749	PAQR7	ENST00000374296
1	26232880	26232957	-	protein_coding	ENSG00000117632	STMN1	ENST00000426559
1	26232880	26232957	-	protein_coding	ENSG00000117632	STMN1	ENST00000455785
1	26232343	26232644	-	protein_coding	ENSG00000117632	STMN1	ENST00000399728
1	26233279	26233482	-	protein_coding	ENSG00000117632	STMN1	ENST00000357865
1	26231540	26231619	-	protein_coding	ENSG00000117632	STMN1	ENST00000374291
1	26231635	26231980	-	protein_coding	ENSG00000117632	STMN1	ENST00000446334
1	26324516	26324648	-	protein_coding	ENSG00000158006	PAFAH2	ENST00000374282
1	26324516	26324535	-	protein_coding	ENSG00000158006	PAFAH2	ENST00000374284
1	26323939	26324112	-	protein_coding	ENSG00000158006	PAFAH2	ENST00000439092
1	26324516	26324546	-	protein_coding	ENSG00000158006	PAFAH2	ENST00000441420
1	26348271	26349916	+	protein_coding	ENSG00000158008	EXTL1	ENST00000374280
1	26372338	26372604	-	protein_coding	ENSG00000158014	SLC30A2	ENST00000374278
1	26372338	26372624	-	protein_coding	ENSG00000158014	SLC30A2	ENST00000374276
1	26393827	26394124	-	protein_coding	ENSG00000158022	TRIM63	ENST00000374272
1	26437664	26437911	+	protein_coding	ENSG00000175087	PDIK1L	ENST00000444713
1	26438328	26438406	+	protein_coding	ENSG00000175087	PDIK1L	ENST00000374271
1	26438340	26438406	+	protein_coding	ENSG00000175087	PDIK1L	ENST00000374269
1	26485511	26485617	+	protein_coding	ENSG00000197245	FAM110D	ENST00000374268
1	26496362	26496674	+	protein_coding	ENSG00000142684	ZNF593	ENST00000374266
1	26496433	26496674	+	protein_coding	ENSG00000142684	ZNF593	ENST00000270812
1	26503894	26504090	+	protein_coding	ENSG00000142675	CNKSR1	ENST00000361530
1	26504000	26504090	+	protein_coding	ENSG00000142675	CNKSR1	ENST00000374253
1	26506659	26507101	+	protein_coding	ENSG00000142675	CNKSR1	ENST00000531191
1	26517052	26517331	+	protein_coding	ENSG00000188782	CATSPER4	ENST00000338855
1	26517052	26517331	+	protein_coding	ENSG00000188782	CATSPER4	ENST00000456354
1	26560691	26560801	+	protein_coding	ENSG00000130695	CEP85	ENST00000451429
1	26560693	26560801	+	protein_coding	ENSG00000130695	CEP85	ENST00000252992
1	26584164	26584221	+	protein_coding	ENSG00000130695	CEP85	ENST00000453146
1	26605667	26606694	+	protein_coding	ENSG00000142669	SH3BGRL3	ENST00000270792
1	26606613	26606694	+	protein_coding	ENSG00000142669	SH3BGRL3	ENST00000319041
1	26633083	26633127	-	protein_coding	ENSG00000158062	UBXN11	ENST00000314675
1	26633083	26633111	-	protein_coding	ENSG00000158062	UBXN11	ENST00000374223
1	26633083	26633123	-	protein_coding	ENSG00000158062	UBXN11	ENST00000357089
1	26633083	26633136	-	protein_coding	ENSG00000158062	UBXN11	ENST00000374221
1	26644538	26644854	-	protein_coding	ENSG00000158062	UBXN11	ENST00000374222
1	26644538	26644756	-	protein_coding	ENSG00000158062	UBXN11	ENST00000374217
1	26633083	26633126	-	protein_coding	ENSG00000158062	UBXN11	ENST00000535108
1	26633083	26633127	-	protein_coding	ENSG00000158062	UBXN11	ENST00000436301
1	26633083	26633100	-	protein_coding	ENSG00000158062	UBXN11	ENST00000374215
1	26629534	26629658	-	protein_coding	ENSG00000158062	UBXN11	ENST00000452980
1	26629304	26629507	-	protein_coding	ENSG00000158062	UBXN11	ENST00000442942
1	26633347	26633480	-	protein_coding	ENSG00000158062	UBXN11	ENST00000450041
1	26633083	26633127	-	protein_coding	ENSG00000158062	UBXN11	ENST00000423664
1	26632779	26633067	-	protein_coding	ENSG00000158062	UBXN11	ENST00000421827
1	26644448	26644562	+	protein_coding	ENSG00000169442	CD52	ENST00000374213
1	26670236	26670576	-	protein_coding	ENSG00000176092	AIM1L	ENST00000527815
1	26670236	26670443	-	protein_coding	ENSG00000176092	AIM1L	ENST00000308182
1	26665781	26665837	-	protein_coding	ENSG00000176092	AIM1L	ENST00000429942
1	26680527	26680621	-	protein_coding	ENSG00000176092	AIM1L	ENST00000475866
1	26699160	26699226	-	protein_coding	ENSG00000176083	ZNF683	ENST00000403843
1	26699160	26699266	-	protein_coding	ENSG00000176083	ZNF683	ENST00000436292
1	26699160	26699266	-	protein_coding	ENSG00000176083	ZNF683	ENST00000374204
1	26699160	26699226	-	protein_coding	ENSG00000176083	ZNF683	ENST00000349618
1	26700769	26701013	-	protein_coding	ENSG00000176083	ZNF683	ENST00000455900
1	26697124	26697236	-	protein_coding	ENSG00000176083	ZNF683	ENST00000451801
1	26697124	26697241	-	protein_coding	ENSG00000176083	ZNF683	ENST00000454975
1	26698955	26699235	-	protein_coding	ENSG00000176083	ZNF683	ENST00000453132
1	26699026	26699191	-	protein_coding	ENSG00000176083	ZNF683	ENST00000423508
1	26700769	26700943	-	protein_coding	ENSG00000176083	ZNF683	ENST00000416125
1	26737269	26737413	+	protein_coding	ENSG00000131914	LIN28A	ENST00000326279
1	26737308	26737413	+	protein_coding	ENSG00000131914	LIN28A	ENST00000254231
1	26758807	26758867	+	protein_coding	ENSG00000117682	DHDDS	ENST00000427245
1	26758830	26758867	+	protein_coding	ENSG00000117682	DHDDS	ENST00000525682
1	26758830	26758867	+	protein_coding	ENSG00000117682	DHDDS	ENST00000236342
1	26758831	26758867	+	protein_coding	ENSG00000117682	DHDDS	ENST00000526219
1	26758833	26758867	+	protein_coding	ENSG00000117682	DHDDS	ENST00000374185
1	26758846	26758867	+	protein_coding	ENSG00000117682	DHDDS	ENST00000360009
1	26758857	26758886	+	protein_coding	ENSG00000117682	DHDDS	ENST00000533087
1	26758858	26758906	+	protein_coding	ENSG00000117682	DHDDS	ENST00000531312
1	26758859	26759009	+	protein_coding	ENSG00000117682	DHDDS	ENST00000525165
1	26758862	26759085	+	protein_coding	ENSG00000117682	DHDDS	ENST00000525326
1	26758862	26759132	+	protein_coding	ENSG00000117682	DHDDS	ENST00000525546
1	26758881	26759009	+	protein_coding	ENSG00000117682	DHDDS	ENST00000436153
1	26758894	26759214	+	protein_coding	ENSG00000117682	DHDDS	ENST00000530781
1	26759382	26759499	+	protein_coding	ENSG00000117682	DHDDS	ENST00000430232
1	26769327	26769364	+	protein_coding	ENSG00000117682	DHDDS	ENST00000431933
1	26772855	26772923	+	protein_coding	ENSG00000117682	DHDDS	ENST00000416052
1	26799010	26799118	+	protein_coding	ENSG00000198830	HMGN2	ENST00000361427
1	26856258	26856474	+	protein_coding	ENSG00000117676	RPS6KA1	ENST00000374168
1	26856269	26856474	+	protein_coding	ENSG00000117676	RPS6KA1	ENST00000374166
1	26857709	26857929	+	protein_coding	ENSG00000117676	RPS6KA1	ENST00000526792
1	26857819	26857929	+	protein_coding	ENSG00000117676	RPS6KA1	ENST00000529454
1	26857819	26857929	+	protein_coding	ENSG00000117676	RPS6KA1	ENST00000374162
1	26869603	26869712	+	protein_coding	ENSG00000117676	RPS6KA1	ENST00000530003
1	26872343	26872526	+	protein_coding	ENSG00000117676	RPS6KA1	ENST00000531382
1	26883534	26883591	+	protein_coding	ENSG00000117676	RPS6KA1	ENST00000403732
1	26898761	26898784	+	protein_coding	ENSG00000117676	RPS6KA1	ENST00000438977
1	27022524	27024031	+	protein_coding	ENSG00000117713	ARID1A	ENST00000324856
1	27022895	27024031	+	protein_coding	ENSG00000117713	ARID1A	ENST00000457599
1	27054199	27054364	+	protein_coding	ENSG00000117713	ARID1A	ENST00000524572
1	27055871	27056354	+	protein_coding	ENSG00000117713	ARID1A	ENST00000374152
1	27097720	27097817	+	protein_coding	ENSG00000117713	ARID1A	ENST00000430799
1	27099455	27099478	+	protein_coding	ENSG00000117713	ARID1A	ENST00000540690
1	27113963	27114297	+	protein_coding	ENSG00000060642	PIGV	ENST00000430292
1	27114486	27114759	+	protein_coding	ENSG00000060642	PIGV	ENST00000078527
1	27114589	27114885	+	protein_coding	ENSG00000060642	PIGV	ENST00000431541
1	27114679	27114885	+	protein_coding	ENSG00000060642	PIGV	ENST00000449950
1	27114686	27115310	+	protein_coding	ENSG00000060642	PIGV	ENST00000374145
1	27115419	27115521	+	protein_coding	ENSG00000060642	PIGV	ENST00000455364
1	27153201	27153630	+	protein_coding	ENSG00000204160	ZDHHC18	ENST00000374142
1	27158495	27158544	+	protein_coding	ENSG00000204160	ZDHHC18	ENST00000374141
1	27158511	27158563	+	protein_coding	ENSG00000204160	ZDHHC18	ENST00000534643
1	27176853	27176929	+	protein_coding	ENSG00000204160	ZDHHC18	ENST00000488397
1	27189633	27190947	+	protein_coding	ENSG00000175793	SFN	ENST00000339276
1	27216177	27216788	-	protein_coding	ENSG00000142751	GPN2	ENST00000374135
1	27212968	27213016	-	protein_coding	ENSG00000142751	GPN2	ENST00000374133
1	27216436	27216751	-	protein_coding	ENSG00000142751	GPN2	ENST00000431781
1	27219880	27219939	-	protein_coding	ENSG00000198746	GPATCH3	ENST00000445019
1	27226483	27226957	-	protein_coding	ENSG00000198746	GPATCH3	ENST00000361720
1	27219161	27219383	-	protein_coding	ENSG00000198746	GPATCH3	ENST00000450844
1	27226729	27226891	+	protein_coding	ENSG00000090273	NUDC	ENST00000435827
1	27248217	27248420	+	protein_coding	ENSG00000090273	NUDC	ENST00000321265
1	27248633	27248983	+	protein_coding	ENSG00000090273	NUDC	ENST00000452707
1	27239900	27240457	-	protein_coding	ENSG00000131910	NR0B2	ENST00000254227
1	27286841	27286897	-	protein_coding	ENSG00000175707	C1orf172	ENST00000320567
1	27320198	27321103	+	protein_coding	ENSG00000253368	TRNP1	ENST00000522111
1	27320810	27321121	+	protein_coding	ENSG00000253368	TRNP1	ENST00000531285
1	27338898	27339327	-	protein_coding	ENSG00000158246	FAM46B	ENST00000289166
1	27480474	27481401	-	protein_coding	ENSG00000090020	SLC9A1	ENST00000263980
1	27480474	27480973	-	protein_coding	ENSG00000090020	SLC9A1	ENST00000545949
1	27480474	27481089	-	protein_coding	ENSG00000090020	SLC9A1	ENST00000374086
1	27493262	27493472	-	protein_coding	ENSG00000090020	SLC9A1	ENST00000374084
1	27561007	27561442	+	protein_coding	ENSG00000142784	WDTC1	ENST00000319394
1	27561159	27561442	+	protein_coding	ENSG00000142784	WDTC1	ENST00000361771
1	27648651	27648882	+	protein_coding	ENSG00000186501	TMEM222	ENST00000374076
1	27648739	27648882	+	protein_coding	ENSG00000186501	TMEM222	ENST00000608611
1	27648745	27648882	+	protein_coding	ENSG00000186501	TMEM222	ENST00000466759
1	27648772	27648882	+	protein_coding	ENSG00000186501	TMEM222	ENST00000464813
1	27648791	27648882	+	protein_coding	ENSG00000186501	TMEM222	ENST00000498220
1	27668513	27668641	+	protein_coding	ENSG00000142765	SYTL1	ENST00000318074
1	27669719	27669763	+	protein_coding	ENSG00000142765	SYTL1	ENST00000473280
1	27671364	27672016	+	protein_coding	ENSG00000142765	SYTL1	ENST00000543823
1	27682879	27682962	-	protein_coding	ENSG00000142733	MAP3K6	ENST00000486046
1	27690408	27690442	-	protein_coding	ENSG00000142733	MAP3K6	ENST00000472410
1	27692749	27693349	-	protein_coding	ENSG00000142733	MAP3K6	ENST00000374040
1	27693230	27693383	-	protein_coding	ENSG00000142733	MAP3K6	ENST00000493901
1	27692749	27693357	-	protein_coding	ENSG00000142733	MAP3K6	ENST00000357582
1	27701219	27701315	-	protein_coding	ENSG00000142748	FCN3	ENST00000270879
1	27701219	27701315	-	protein_coding	ENSG00000142748	FCN3	ENST00000354982
1	27709642	27709793	-	protein_coding	ENSG00000174950	CD164L2	ENST00000374027
1	27709642	27709870	-	protein_coding	ENSG00000174950	CD164L2	ENST00000374030
1	27709642	27709796	-	protein_coding	ENSG00000174950	CD164L2	ENST00000374025
1	27719148	27719241	+	protein_coding	ENSG00000181773	GPR3	ENST00000374024
1	27816497	27816669	-	protein_coding	ENSG00000158195	WASF2	ENST00000430629
1	27816497	27816562	-	protein_coding	ENSG00000158195	WASF2	ENST00000536657
1	27929908	27930102	-	protein_coding	ENSG00000126705	AHDC1	ENST00000247087
1	27929908	27930143	-	protein_coding	ENSG00000126705	AHDC1	ENST00000374011
1	27961576	27961788	-	protein_coding	ENSG00000000938	FGR	ENST00000374005
1	27961576	27961727	-	protein_coding	ENSG00000000938	FGR	ENST00000545953
1	27952557	27952751	-	protein_coding	ENSG00000000938	FGR	ENST00000399173
1	27950202	27950573	-	protein_coding	ENSG00000000938	FGR	ENST00000374004
1	27952971	27953080	-	protein_coding	ENSG00000000938	FGR	ENST00000374003
1	27952557	27952646	-	protein_coding	ENSG00000000938	FGR	ENST00000457296
1	27998634	27998729	-	protein_coding	ENSG00000126709	IFI6	ENST00000361157
1	27998634	27998689	-	protein_coding	ENSG00000126709	IFI6	ENST00000339145
1	27998634	27998709	-	protein_coding	ENSG00000126709	IFI6	ENST00000362020
1	28052490	28052672	+	protein_coding	ENSG00000009780	FAM76A	ENST00000373954
1	28052507	28052672	+	protein_coding	ENSG00000009780	FAM76A	ENST00000419687
1	28052539	28052672	+	protein_coding	ENSG00000009780	FAM76A	ENST00000530324
1	28052539	28052672	+	protein_coding	ENSG00000009780	FAM76A	ENST00000234549
1	28052539	28052672	+	protein_coding	ENSG00000009780	FAM76A	ENST00000373949
1	28052568	28052672	+	protein_coding	ENSG00000009780	FAM76A	ENST00000010299
1	28071285	28071322	+	protein_coding	ENSG00000009780	FAM76A	ENST00000446647
1	28099694	28099936	+	protein_coding	ENSG00000117758	STX12	ENST00000373943
1	28099746	28099936	+	protein_coding	ENSG00000117758	STX12	ENST00000440806
1	28157289	28157402	+	protein_coding	ENSG00000117751	PPP1R8	ENST00000311772
1	28157325	28157877	+	protein_coding	ENSG00000117751	PPP1R8	ENST00000236412
1	28157333	28157757	+	protein_coding	ENSG00000117751	PPP1R8	ENST00000373931
1	28157835	28157877	+	protein_coding	ENSG00000117751	PPP1R8	ENST00000431586
1	28177085	28177255	-	protein_coding	ENSG00000268552	AL109927.1	ENST00000601459
1	28199055	28199176	+	protein_coding	ENSG00000130775	THEMIS2	ENST00000373925
1	28199055	28199176	+	protein_coding	ENSG00000130775	THEMIS2	ENST00000328928
1	28199060	28199176	+	protein_coding	ENSG00000130775	THEMIS2	ENST00000373927
1	28199067	28199176	+	protein_coding	ENSG00000130775	THEMIS2	ENST00000427466
1	28199069	28199176	+	protein_coding	ENSG00000130775	THEMIS2	ENST00000442118
1	28199079	28199176	+	protein_coding	ENSG00000130775	THEMIS2	ENST00000373921
1	28206242	28206565	+	protein_coding	ENSG00000130775	THEMIS2	ENST00000456990
1	28240945	28241254	-	protein_coding	ENSG00000117748	RPA2	ENST00000373912
1	28223516	28223596	-	protein_coding	ENSG00000117748	RPA2	ENST00000419958
1	28241138	28241257	-	protein_coding	ENSG00000117748	RPA2	ENST00000373909
1	28240574	28241024	-	protein_coding	ENSG00000117748	RPA2	ENST00000313433
1	28240933	28241099	-	protein_coding	ENSG00000117748	RPA2	ENST00000444045
1	28261504	28261755	+	protein_coding	ENSG00000130768	SMPDL3B	ENST00000373894
1	28261550	28261755	+	protein_coding	ENSG00000130768	SMPDL3B	ENST00000411604
1	28261550	28261755	+	protein_coding	ENSG00000130768	SMPDL3B	ENST00000373888
1	28261621	28261755	+	protein_coding	ENSG00000130768	SMPDL3B	ENST00000549094
1	28285973	28286873	+	protein_coding	ENSG00000158156	XKR8	ENST00000373884
1	28415035	28415207	-	protein_coding	ENSG00000158161	EYA3	ENST00000373871
1	28415035	28415115	-	protein_coding	ENSG00000158161	EYA3	ENST00000436342
1	28384505	28384598	-	protein_coding	ENSG00000158161	EYA3	ENST00000373864
1	28415035	28415142	-	protein_coding	ENSG00000158161	EYA3	ENST00000540618
1	28415035	28415145	-	protein_coding	ENSG00000158161	EYA3	ENST00000545175
1	28415035	28415075	-	protein_coding	ENSG00000158161	EYA3	ENST00000373863
1	28503103	28503699	-	protein_coding	ENSG00000169403	PTAFR	ENST00000373857
1	28520233	28520447	-	protein_coding	ENSG00000169403	PTAFR	ENST00000539896
1	28520233	28520384	-	protein_coding	ENSG00000169403	PTAFR	ENST00000305392
1	28531769	28531861	-	protein_coding	ENSG00000126698	DNAJC8	ENST00000603289
1	28559432	28559536	-	protein_coding	ENSG00000126698	DNAJC8	ENST00000263697
1	28527105	28527152	-	protein_coding	ENSG00000215902	AL353354.1	ENST00000321830
1	28527070	28527419	+	protein_coding	ENSG00000269804	AL353354.2	ENST00000596102
1	28562620	28562781	+	protein_coding	ENSG00000130770	ATPIF1	ENST00000497986
1	28562644	28562781	+	protein_coding	ENSG00000130770	ATPIF1	ENST00000335514
1	28562653	28562781	+	protein_coding	ENSG00000130770	ATPIF1	ENST00000468425
1	28562665	28562781	+	protein_coding	ENSG00000130770	ATPIF1	ENST00000465645
1	28586038	28586448	+	protein_coding	ENSG00000130766	SESN2	ENST00000253063
1	28655549	28655691	+	protein_coding	ENSG00000130772	MED18	ENST00000373842
1	28655566	28655691	+	protein_coding	ENSG00000130772	MED18	ENST00000398997
1	28696114	28696336	+	protein_coding	ENSG00000204138	PHACTR4	ENST00000373839
1	28764682	28764941	+	protein_coding	ENSG00000204138	PHACTR4	ENST00000373836
1	28832455	28832596	+	protein_coding	ENSG00000180198	RCC1	ENST00000398958
1	28832502	28832596	+	protein_coding	ENSG00000180198	RCC1	ENST00000427469
1	28832568	28832596	+	protein_coding	ENSG00000180198	RCC1	ENST00000434290
1	28832569	28832596	+	protein_coding	ENSG00000180198	RCC1	ENST00000373833
1	28836589	28836616	+	protein_coding	ENSG00000180198	RCC1	ENST00000419074
1	28844648	28844820	+	protein_coding	ENSG00000180198	RCC1	ENST00000373832
1	28844769	28844820	+	protein_coding	ENSG00000180198	RCC1	ENST00000373831
1	28844778	28844820	+	protein_coding	ENSG00000180198	RCC1	ENST00000411533
1	28845138	28845469	+	protein_coding	ENSG00000180198	RCC1	ENST00000486790
1	28845207	28845469	+	protein_coding	ENSG00000180198	RCC1	ENST00000430407
1	28879597	28879649	+	protein_coding	ENSG00000180098	TRNAU1AP	ENST00000373830
1	28969504	28969578	-	protein_coding	ENSG00000120656	TAF12	ENST00000373824
1	28969167	28969517	-	protein_coding	ENSG00000120656	TAF12	ENST00000263974
1	28918712	28918911	+	protein_coding	ENSG00000188060	RAB42	ENST00000373826
1	28995244	28995351	+	protein_coding	ENSG00000162419	GMEB1	ENST00000373816
1	28995290	28995351	+	protein_coding	ENSG00000162419	GMEB1	ENST00000361872
1	28995292	28995351	+	protein_coding	ENSG00000162419	GMEB1	ENST00000294409
1	29063133	29063321	+	protein_coding	ENSG00000198492	YTHDF2	ENST00000474884
1	29063133	29063321	+	protein_coding	ENSG00000198492	YTHDF2	ENST00000542507
1	29063271	29063659	+	protein_coding	ENSG00000198492	YTHDF2	ENST00000373812
1	29063452	29063659	+	protein_coding	ENSG00000198492	YTHDF2	ENST00000541996
1	29063477	29063659	+	protein_coding	ENSG00000198492	YTHDF2	ENST00000496288
1	29138654	29139122	+	protein_coding	ENSG00000116329	OPRD1	ENST00000234961
1	29213603	29213722	+	protein_coding	ENSG00000159023	EPB41	ENST00000343067
1	29213603	29213722	+	protein_coding	ENSG00000159023	EPB41	ENST00000356093
1	29213603	29213722	+	protein_coding	ENSG00000159023	EPB41	ENST00000398863
1	29213636	29213722	+	protein_coding	ENSG00000159023	EPB41	ENST00000373800
1	29213636	29213722	+	protein_coding	ENSG00000159023	EPB41	ENST00000349460
1	29213684	29213722	+	protein_coding	ENSG00000159023	EPB41	ENST00000347529
1	29220253	29220349	+	protein_coding	ENSG00000159023	EPB41	ENST00000373798
1	29241091	29241280	+	protein_coding	ENSG00000159023	EPB41	ENST00000373797
1	29450368	29450447	-	protein_coding	ENSG00000253304	TMEM200B	ENST00000521452
1	29448876	29449013	-	protein_coding	ENSG00000253304	TMEM200B	ENST00000420504
1	29508158	29508499	-	protein_coding	ENSG00000116350	SRSF4	ENST00000373795
1	29508158	29508410	-	protein_coding	ENSG00000116350	SRSF4	ENST00000546138
1	29557243	29557436	-	protein_coding	ENSG00000116353	MECR	ENST00000373791
1	29557243	29557444	-	protein_coding	ENSG00000116353	MECR	ENST00000263702
1	29563028	29563229	+	protein_coding	ENSG00000060656	PTPRU	ENST00000345512
1	29563028	29563229	+	protein_coding	ENSG00000060656	PTPRU	ENST00000373779
1	29563047	29563229	+	protein_coding	ENSG00000060656	PTPRU	ENST00000356870
1	29563047	29563229	+	protein_coding	ENSG00000060656	PTPRU	ENST00000323874
1	29563061	29563229	+	protein_coding	ENSG00000060656	PTPRU	ENST00000428026
1	29563151	29563229	+	protein_coding	ENSG00000060656	PTPRU	ENST00000460170
1	31196305	31196434	-	protein_coding	ENSG00000162510	MATN1	ENST00000373765
1	31230506	31230667	-	protein_coding	ENSG00000162511	LAPTM5	ENST00000294507
1	31349399	31351587	-	protein_coding	ENSG00000162512	SDC3	ENST00000336798
1	31381296	31381608	-	protein_coding	ENSG00000162512	SDC3	ENST00000339394
1	31538463	31538542	-	protein_coding	ENSG00000134644	PUM1	ENST00000424085
1	31538463	31538545	-	protein_coding	ENSG00000134644	PUM1	ENST00000257075
1	31538463	31538551	-	protein_coding	ENSG00000134644	PUM1	ENST00000373747
1	31538536	31538573	-	protein_coding	ENSG00000134644	PUM1	ENST00000525843
1	31538463	31538542	-	protein_coding	ENSG00000134644	PUM1	ENST00000426105
1	31467901	31467906	-	protein_coding	ENSG00000134644	PUM1	ENST00000498419
1	31538463	31538531	-	protein_coding	ENSG00000134644	PUM1	ENST00000440538
1	31538536	31538838	-	protein_coding	ENSG00000134644	PUM1	ENST00000373741
1	31538463	31538540	-	protein_coding	ENSG00000134644	PUM1	ENST00000423018
1	31538536	31538632	-	protein_coding	ENSG00000134644	PUM1	ENST00000373742
1	31426561	31426604	-	protein_coding	ENSG00000134644	PUM1	ENST00000529846
1	31426561	31426591	-	protein_coding	ENSG00000134644	PUM1	ENST00000525997
1	31467901	31467951	-	protein_coding	ENSG00000134644	PUM1	ENST00000532678
1	31534514	31534763	-	protein_coding	ENSG00000134644	PUM1	ENST00000531867
1	31712341	31712401	-	protein_coding	ENSG00000084628	NKAIN1	ENST00000373736
1	31660897	31661000	-	protein_coding	ENSG00000084628	NKAIN1	ENST00000263693
1	31660897	31661000	-	protein_coding	ENSG00000084628	NKAIN1	ENST00000398657
1	31660897	31661000	-	protein_coding	ENSG00000084628	NKAIN1	ENST00000526106
1	31666663	31666767	-	protein_coding	ENSG00000084628	NKAIN1	ENST00000530145
1	31769458	31769617	-	protein_coding	ENSG00000060688	SNRNP40	ENST00000263694
1	31742005	31742513	-	protein_coding	ENSG00000060688	SNRNP40	ENST00000373720
1	31769458	31769662	-	protein_coding	ENSG00000060688	SNRNP40	ENST00000446633
1	31769842	31769922	+	protein_coding	ENSG00000121766	ZCCHC17	ENST00000344147
1	31769855	31770060	+	protein_coding	ENSG00000121766	ZCCHC17	ENST00000373714
1	31769879	31769922	+	protein_coding	ENSG00000121766	ZCCHC17	ENST00000546109
1	31769883	31769922	+	protein_coding	ENSG00000121766	ZCCHC17	ENST00000422613
1	31845789	31845923	-	protein_coding	ENSG00000121769	FABP3	ENST00000373713
1	31849569	31849697	-	protein_coding	ENSG00000121769	FABP3	ENST00000482018
1	31882412	31882699	+	protein_coding	ENSG00000168528	SERINC2	ENST00000373710
1	31883048	31883282	+	protein_coding	ENSG00000168528	SERINC2	ENST00000536859
1	31885963	31886151	+	protein_coding	ENSG00000168528	SERINC2	ENST00000373709
1	31886660	31886911	+	protein_coding	ENSG00000168528	SERINC2	ENST00000536384
1	31902192	31902614	-	protein_coding	ENSG00000268950	AC114494.1	ENST00000596131
1	32042116	32042196	+	protein_coding	ENSG00000142910	TINAGL1	ENST00000457433
1	32042116	32042196	+	protein_coding	ENSG00000142910	TINAGL1	ENST00000441210
1	32042136	32042196	+	protein_coding	ENSG00000142910	TINAGL1	ENST00000271064
1	32042139	32042196	+	protein_coding	ENSG00000142910	TINAGL1	ENST00000537531
1	32083301	32083482	+	protein_coding	ENSG00000121764	HCRTR1	ENST00000403528
1	32084641	32084992	+	protein_coding	ENSG00000121764	HCRTR1	ENST00000373706
1	32084794	32084992	+	protein_coding	ENSG00000121764	HCRTR1	ENST00000373705
1	32110442	32110488	-	protein_coding	ENSG00000162517	PEF1	ENST00000373703
1	32110442	32110474	-	protein_coding	ENSG00000162517	PEF1	ENST00000440872
1	32169438	32169920	-	protein_coding	ENSG00000084636	COL16A1	ENST00000373672
1	32169438	32169768	-	protein_coding	ENSG00000084636	COL16A1	ENST00000271069
1	32131638	32131682	-	protein_coding	ENSG00000084636	COL16A1	ENST00000440437
1	32149308	32149349	-	protein_coding	ENSG00000084636	COL16A1	ENST00000458715
1	32169438	32169920	-	protein_coding	ENSG00000084636	COL16A1	ENST00000373668
1	32162564	32162611	-	protein_coding	ENSG00000084636	COL16A1	ENST00000373667
1	32224922	32225024	-	protein_coding	ENSG00000121753	BAI2	ENST00000398556
1	32229485	32229523	-	protein_coding	ENSG00000121753	BAI2	ENST00000398547
1	32229485	32229636	-	protein_coding	ENSG00000121753	BAI2	ENST00000373655
1	32229485	32229636	-	protein_coding	ENSG00000121753	BAI2	ENST00000373658
1	32229485	32229941	-	protein_coding	ENSG00000121753	BAI2	ENST00000398542
1	32229485	32229648	-	protein_coding	ENSG00000121753	BAI2	ENST00000257070
1	32222802	32222860	-	protein_coding	ENSG00000121753	BAI2	ENST00000527361
1	32210249	32210333	-	protein_coding	ENSG00000121753	BAI2	ENST00000440175
1	32221600	32222402	-	protein_coding	ENSG00000121753	BAI2	ENST00000398538
1	32221600	32222416	-	protein_coding	ENSG00000121753	BAI2	ENST00000420125
1	32230281	32230494	-	protein_coding	ENSG00000121753	BAI2	ENST00000533175
1	32226284	32226627	-	protein_coding	ENSG00000121753	BAI2	ENST00000436464
1	32281562	32281623	-	protein_coding	ENSG00000134668	SPOCD1	ENST00000257100
1	32281562	32281652	-	protein_coding	ENSG00000134668	SPOCD1	ENST00000360482
1	32281562	32281580	-	protein_coding	ENSG00000134668	SPOCD1	ENST00000373648
1	32264043	32264440	-	protein_coding	ENSG00000134668	SPOCD1	ENST00000452755
1	32279552	32280976	-	protein_coding	ENSG00000134668	SPOCD1	ENST00000533231
1	32264043	32264317	-	protein_coding	ENSG00000134668	SPOCD1	ENST00000528579
1	32281345	32281603	-	protein_coding	ENSG00000134668	SPOCD1	ENST00000529396
1	32281562	32281623	-	protein_coding	ENSG00000134668	SPOCD1	ENST00000528791
1	32281345	32281621	-	protein_coding	ENSG00000134668	SPOCD1	ENST00000525930
1	32384571	32385084	-	protein_coding	ENSG00000184007	PTP4A2	ENST00000602725
1	32403588	32403988	-	protein_coding	ENSG00000184007	PTP4A2	ENST00000344035
1	32403588	32403988	-	protein_coding	ENSG00000184007	PTP4A2	ENST00000356536
1	32384571	32384969	-	protein_coding	ENSG00000184007	PTP4A2	ENST00000457805
1	32384571	32384710	-	protein_coding	ENSG00000184007	PTP4A2	ENST00000602683
1	32384571	32384724	-	protein_coding	ENSG00000184007	PTP4A2	ENST00000470404
1	32408130	32408177	-	protein_coding	ENSG00000184007	PTP4A2	ENST00000468531
1	32403356	32403386	-	protein_coding	ENSG00000184007	PTP4A2	ENST00000534796
1	32379174	32380745	+	protein_coding	ENSG00000212673	AL136115.1	ENST00000391369
1	32479430	32479978	+	protein_coding	ENSG00000121774	KHDRBS1	ENST00000327300
1	32479597	32479978	+	protein_coding	ENSG00000121774	KHDRBS1	ENST00000492989
1	32538503	32538652	+	protein_coding	ENSG00000121775	TMEM39B	ENST00000336294
1	32538536	32538652	+	protein_coding	ENSG00000121775	TMEM39B	ENST00000438825
1	32538567	32538652	+	protein_coding	ENSG00000121775	TMEM39B	ENST00000456834
1	32538593	32538652	+	protein_coding	ENSG00000121775	TMEM39B	ENST00000373634
1	32538597	32538652	+	protein_coding	ENSG00000121775	TMEM39B	ENST00000427288
1	32573639	32573735	+	protein_coding	ENSG00000025800	KPNA6	ENST00000373625
1	32573889	32574095	+	protein_coding	ENSG00000025800	KPNA6	ENST00000537234
1	32608580	32608625	+	protein_coding	ENSG00000025800	KPNA6	ENST00000545542
1	32622463	32622546	+	protein_coding	ENSG00000025800	KPNA6	ENST00000446515
1	32645287	32645377	+	protein_coding	ENSG00000084652	TXLNA	ENST00000373610
1	32645666	32646115	+	protein_coding	ENSG00000084652	TXLNA	ENST00000373609
1	32665987	32666310	+	protein_coding	ENSG00000160050	CCDC28B	ENST00000373602
1	32666234	32666310	+	protein_coding	ENSG00000160050	CCDC28B	ENST00000421922
1	32671236	32671564	+	protein_coding	ENSG00000160051	IQCC	ENST00000537469
1	32671262	32671324	+	protein_coding	ENSG00000160051	IQCC	ENST00000291358
1	32674695	32674960	+	protein_coding	ENSG00000222046	DCDC2B	ENST00000409358
1	32687908	32687972	-	protein_coding	ENSG00000160055	TMEM234	ENST00000545122
1	32687908	32687926	-	protein_coding	ENSG00000160055	TMEM234	ENST00000309777
1	32687908	32687944	-	protein_coding	ENSG00000160055	TMEM234	ENST00000373593
1	32687908	32687939	-	protein_coding	ENSG00000160055	TMEM234	ENST00000344461
1	32687529	32687633	+	protein_coding	ENSG00000084623	EIF3I	ENST00000355082
1	32687971	32688045	+	protein_coding	ENSG00000084623	EIF3I	ENST00000373586
1	32712834	32713283	+	protein_coding	ENSG00000183615	FAM167B	ENST00000373582
1	32716840	32716972	+	protein_coding	ENSG00000182866	LCK	ENST00000336890
1	32716865	32716972	+	protein_coding	ENSG00000182866	LCK	ENST00000482949
1	32716875	32716972	+	protein_coding	ENSG00000182866	LCK	ENST00000495610
1	32739714	32739827	+	protein_coding	ENSG00000182866	LCK	ENST00000461712
1	32739716	32739827	+	protein_coding	ENSG00000182866	LCK	ENST00000373562
1	32739722	32740035	+	protein_coding	ENSG00000182866	LCK	ENST00000477031
1	32739722	32740035	+	protein_coding	ENSG00000182866	LCK	ENST00000373557
1	32739733	32739827	+	protein_coding	ENSG00000182866	LCK	ENST00000333070
1	32739931	32740035	+	protein_coding	ENSG00000182866	LCK	ENST00000373564
1	32757687	32757819	+	protein_coding	ENSG00000116478	HDAC1	ENST00000373548
1	32757741	32757819	+	protein_coding	ENSG00000116478	HDAC1	ENST00000428704
1	32757993	32758038	+	protein_coding	ENSG00000116478	HDAC1	ENST00000373541
1	32801548	32801980	-	protein_coding	ENSG00000175130	MARCKSL1	ENST00000329421
1	32819055	32819142	+	protein_coding	ENSG00000162526	TSSK3	ENST00000574315
1	32827798	32828447	+	protein_coding	ENSG00000162526	TSSK3	ENST00000373534
1	32827559	32827844	-	protein_coding	ENSG00000225828	FAM229A	ENST00000432622
1	32827331	32827425	-	protein_coding	ENSG00000225828	FAM229A	ENST00000428500
1	32860005	32860049	-	protein_coding	ENSG00000160058	BSDC1	ENST00000455895
1	32860005	32860034	-	protein_coding	ENSG00000160058	BSDC1	ENST00000413080
1	32860005	32860027	-	protein_coding	ENSG00000160058	BSDC1	ENST00000341071
1	32860005	32860042	-	protein_coding	ENSG00000160058	BSDC1	ENST00000526031
1	32860005	32860042	-	protein_coding	ENSG00000160058	BSDC1	ENST00000419121
1	32860005	32860031	-	protein_coding	ENSG00000160058	BSDC1	ENST00000446293
1	32860005	32860034	-	protein_coding	ENSG00000160058	BSDC1	ENST00000449308
1	32860005	32860026	-	protein_coding	ENSG00000160058	BSDC1	ENST00000527163
1	32860005	32860029	-	protein_coding	ENSG00000160058	BSDC1	ENST00000530485
1	32930670	32930706	+	protein_coding	ENSG00000273274	ZBTB8B	ENST00000609129
1	33005028	33005173	+	protein_coding	ENSG00000160062	ZBTB8A	ENST00000373510
1	33005030	33005173	+	protein_coding	ENSG00000160062	ZBTB8A	ENST00000316459
1	33116034	33116166	-	protein_coding	ENSG00000176261	ZBTB8OS	ENST00000341885
1	33116034	33116185	-	protein_coding	ENSG00000176261	ZBTB8OS	ENST00000468695
1	33116034	33116161	-	protein_coding	ENSG00000176261	ZBTB8OS	ENST00000436661
1	33116034	33116161	-	protein_coding	ENSG00000176261	ZBTB8OS	ENST00000373501
1	33116743	33116923	+	protein_coding	ENSG00000162521	RBBP4	ENST00000414241
1	33116749	33116923	+	protein_coding	ENSG00000162521	RBBP4	ENST00000373493
1	33116818	33116923	+	protein_coding	ENSG00000162521	RBBP4	ENST00000544435
1	33116835	33116923	+	protein_coding	ENSG00000162521	RBBP4	ENST00000373485
1	33116957	33117033	+	protein_coding	ENSG00000162521	RBBP4	ENST00000458695
1	33117086	33117423	+	protein_coding	ENSG00000162521	RBBP4	ENST00000490500
1	33117088	33117316	+	protein_coding	ENSG00000162521	RBBP4	ENST00000445722
1	33133920	33133999	+	protein_coding	ENSG00000162521	RBBP4	ENST00000475321
1	33134694	33134733	+	protein_coding	ENSG00000162521	RBBP4	ENST00000463378
1	33134857	33134958	+	protein_coding	ENSG00000162521	RBBP4	ENST00000482190
1	33168209	33168361	-	protein_coding	ENSG00000162520	SYNC	ENST00000373484
1	33168209	33168720	-	protein_coding	ENSG00000162520	SYNC	ENST00000409190
1	33169109	33169197	-	protein_coding	ENSG00000162520	SYNC	ENST00000417633
1	33168551	33168680	-	protein_coding	ENSG00000162520	SYNC	ENST00000426909
1	33207486	33207790	+	protein_coding	ENSG00000162522	KIAA1522	ENST00000401073
1	33219622	33219781	+	protein_coding	ENSG00000162522	KIAA1522	ENST00000373481
1	33231235	33231428	+	protein_coding	ENSG00000162522	KIAA1522	ENST00000294521
1	33231268	33231428	+	protein_coding	ENSG00000162522	KIAA1522	ENST00000373480
1	33282789	33283754	-	protein_coding	ENSG00000134684	YARS	ENST00000373477
1	33282368	33282583	+	protein_coding	ENSG00000116497	S100PBP	ENST00000530710
1	33283043	33283200	+	protein_coding	ENSG00000116497	S100PBP	ENST00000373476
1	33283156	33283290	+	protein_coding	ENSG00000116497	S100PBP	ENST00000373475
1	33283158	33283290	+	protein_coding	ENSG00000116497	S100PBP	ENST00000529027
1	33283176	33283290	+	protein_coding	ENSG00000116497	S100PBP	ENST00000398243
1	33283254	33283290	+	protein_coding	ENSG00000116497	S100PBP	ENST00000526230
1	33283256	33283290	+	protein_coding	ENSG00000116497	S100PBP	ENST00000531256
1	33283300	33283447	+	protein_coding	ENSG00000116497	S100PBP	ENST00000482212
1	33290498	33291030	+	protein_coding	ENSG00000116497	S100PBP	ENST00000530552
1	33336254	33336414	-	protein_coding	ENSG00000160097	FNDC5	ENST00000373471
1	33336254	33336414	-	protein_coding	ENSG00000160097	FNDC5	ENST00000609187
1	33337995	33338081	-	protein_coding	ENSG00000160097	FNDC5	ENST00000496770
1	33352036	33352116	+	protein_coding	ENSG00000121905	HPCA	ENST00000373467
1	33366824	33366959	-	protein_coding	ENSG00000121900	TMEM54	ENST00000373463
1	33366824	33366990	-	protein_coding	ENSG00000121900	TMEM54	ENST00000329151
1	33429652	33430286	-	protein_coding	ENSG00000116514	RNF19B	ENST00000373456
1	33429652	33430286	-	protein_coding	ENSG00000116514	RNF19B	ENST00000356990
1	33429652	33430286	-	protein_coding	ENSG00000116514	RNF19B	ENST00000235150
1	33439268	33439642	+	protein_coding	ENSG00000267885	FKSG48	ENST00000594612
1	33502337	33502471	-	protein_coding	ENSG00000004455	AK2	ENST00000373449
1	33502337	33502441	-	protein_coding	ENSG00000004455	AK2	ENST00000548033
1	33502337	33502487	-	protein_coding	ENSG00000004455	AK2	ENST00000467905
1	33502337	33502478	-	protein_coding	ENSG00000004455	AK2	ENST00000480134
1	33502337	33502593	-	protein_coding	ENSG00000004455	AK2	ENST00000354858
1	33502337	33502445	-	protein_coding	ENSG00000004455	AK2	ENST00000487289
1	33546714	33546895	+	protein_coding	ENSG00000142920	ADC	ENST00000294517
1	33546714	33546895	+	protein_coding	ENSG00000142920	ADC	ENST00000358680
1	33546768	33546895	+	protein_coding	ENSG00000142920	ADC	ENST00000373443
1	33546768	33546895	+	protein_coding	ENSG00000142920	ADC	ENST00000398167
1	33547851	33547955	+	protein_coding	ENSG00000142920	ADC	ENST00000373440
1	33547851	33547955	+	protein_coding	ENSG00000142920	ADC	ENST00000373441
1	33646626	33647267	-	protein_coding	ENSG00000116525	TRIM62	ENST00000291416
1	33642009	33642151	-	protein_coding	ENSG00000116525	TRIM62	ENST00000543586
1	33722146	33722255	+	protein_coding	ENSG00000160094	ZNF362	ENST00000483388
1	33722174	33722255	+	protein_coding	ENSG00000160094	ZNF362	ENST00000539719
1	33736176	33736213	+	protein_coding	ENSG00000160094	ZNF362	ENST00000373428
1	33786677	33786699	-	protein_coding	ENSG00000184389	A3GALT2	ENST00000442999
1	33777653	33777822	-	protein_coding	ENSG00000184389	A3GALT2	ENST00000330379
1	33840967	33841194	-	protein_coding	ENSG00000134686	PHC2	ENST00000431992
1	33815198	33815486	-	protein_coding	ENSG00000134686	PHC2	ENST00000373418
1	33820439	33820810	-	protein_coding	ENSG00000134686	PHC2	ENST00000373422
1	33840967	33841194	-	protein_coding	ENSG00000134686	PHC2	ENST00000257118
1	33895782	33896216	-	protein_coding	ENSG00000134686	PHC2	ENST00000419414
1	33840967	33841194	-	protein_coding	ENSG00000134686	PHC2	ENST00000373416
1	33938246	33938288	+	protein_coding	ENSG00000121903	ZSCAN20	ENST00000361328
1	33938252	33938292	+	protein_coding	ENSG00000121903	ZSCAN20	ENST00000373413
1	34630512	34630875	-	protein_coding	ENSG00000121904	CSMD2	ENST00000373381
1	34174689	34175104	-	protein_coding	ENSG00000121904	CSMD2	ENST00000373380
1	34092086	34092184	-	protein_coding	ENSG00000121904	CSMD2	ENST00000373377
1	34174689	34175104	-	protein_coding	ENSG00000121904	CSMD2	ENST00000373388
1	34279603	34279820	-	protein_coding	ENSG00000121904	CSMD2	ENST00000338325
1	34326076	34326491	+	protein_coding	ENSG00000176256	HMGB4	ENST00000519684
1	34326101	34326491	+	protein_coding	ENSG00000176256	HMGB4	ENST00000522796
1	34632484	34632772	+	protein_coding	ENSG00000142698	C1orf94	ENST00000373374
1	34643271	34643710	+	protein_coding	ENSG00000142698	C1orf94	ENST00000488417
1	35325278	35325417	-	protein_coding	ENSG00000163866	SMIM12	ENST00000521580
1	35322787	35324670	-	protein_coding	ENSG00000163866	SMIM12	ENST00000446026
1	35325253	35325356	-	protein_coding	ENSG00000163866	SMIM12	ENST00000456842
1	35325056	35325318	-	protein_coding	ENSG00000163866	SMIM12	ENST00000423898
1	35324441	35324646	-	protein_coding	ENSG00000163866	SMIM12	ENST00000417239
1	35220648	35220796	+	protein_coding	ENSG00000189280	GJB5	ENST00000338513
1	35225342	35225389	+	protein_coding	ENSG00000189433	GJB4	ENST00000339480
1	35246790	35247379	+	protein_coding	ENSG00000188910	GJB3	ENST00000373366
1	35247879	35248043	+	protein_coding	ENSG00000188910	GJB3	ENST00000373362
1	35258599	35258669	+	protein_coding	ENSG00000187513	GJA4	ENST00000342280
1	35258600	35258669	+	protein_coding	ENSG00000187513	GJA4	ENST00000450137
1	35395052	35395186	-	protein_coding	ENSG00000116544	DLGAP3	ENST00000373347
1	35369878	35370984	-	protein_coding	ENSG00000116544	DLGAP3	ENST00000235180
1	35450799	35450954	-	protein_coding	ENSG00000243749	ZMYM6NB	ENST00000373337
1	35497416	35497569	-	protein_coding	ENSG00000163867	ZMYM6	ENST00000373340
1	35497416	35497569	-	protein_coding	ENSG00000163867	ZMYM6	ENST00000357182
1	35497127	35497233	-	protein_coding	ENSG00000163867	ZMYM6	ENST00000415531
1	35497416	35497506	-	protein_coding	ENSG00000163867	ZMYM6	ENST00000317538
1	35497232	35497291	-	protein_coding	ENSG00000163867	ZMYM6	ENST00000373333
1	35525387	35525526	+	protein_coding	ENSG00000197056	ZMYM1	ENST00000417119
1	35544968	35545043	+	protein_coding	ENSG00000197056	ZMYM1	ENST00000359858
1	35544992	35545043	+	protein_coding	ENSG00000197056	ZMYM1	ENST00000373330
1	35657823	35658749	-	protein_coding	ENSG00000116560	SFPQ	ENST00000357214
1	35734568	35734686	+	protein_coding	ENSG00000146463	ZMYM4	ENST00000314607
1	35734568	35734686	+	protein_coding	ENSG00000146463	ZMYM4	ENST00000373297
1	35734634	35734686	+	protein_coding	ENSG00000146463	ZMYM4	ENST00000441447
1	35827306	35827390	+	protein_coding	ENSG00000146463	ZMYM4	ENST00000457946
1	36022808	36023014	-	protein_coding	ENSG00000142687	KIAA0319L	ENST00000325722
1	35920215	35920308	-	protein_coding	ENSG00000142687	KIAA0319L	ENST00000373266
1	36023151	36023256	-	protein_coding	ENSG00000142687	KIAA0319L	ENST00000426982
1	36020501	36020588	-	protein_coding	ENSG00000142687	KIAA0319L	ENST00000440579
1	35972213	35972468	-	protein_coding	ENSG00000142687	KIAA0319L	ENST00000431916
1	36022963	36023004	-	protein_coding	ENSG00000142687	KIAA0319L	ENST00000469892
1	36020390	36020588	-	protein_coding	ENSG00000142687	KIAA0319L	ENST00000494948
1	36023074	36023484	+	protein_coding	ENSG00000020129	NCDN	ENST00000373253
1	36023393	36023484	+	protein_coding	ENSG00000020129	NCDN	ENST00000356090
1	36023409	36023824	+	protein_coding	ENSG00000020129	NCDN	ENST00000373243
1	36024107	36024286	+	protein_coding	ENSG00000020129	NCDN	ENST00000437806
1	36028069	36028234	+	protein_coding	ENSG00000020129	NCDN	ENST00000423723
1	36038971	36039205	+	protein_coding	ENSG00000116819	TFAP2E	ENST00000373235
1	36106943	36107445	-	protein_coding	ENSG00000126067	PSMB2	ENST00000373237
1	36184308	36185073	-	protein_coding	ENSG00000142686	C1orf216	ENST00000270815
1	36235448	36235568	-	protein_coding	ENSG00000092853	CLSPN	ENST00000251195
1	36235448	36235529	-	protein_coding	ENSG00000092853	CLSPN	ENST00000318121
1	36235448	36235529	-	protein_coding	ENSG00000092853	CLSPN	ENST00000373220
1	36235448	36235529	-	protein_coding	ENSG00000092853	CLSPN	ENST00000520551
1	36273773	36274036	+	protein_coding	ENSG00000134698	AGO4	ENST00000373210
1	36335409	36335504	+	protein_coding	ENSG00000092847	AGO1	ENST00000373206
1	36348810	36349047	+	protein_coding	ENSG00000092847	AGO1	ENST00000373204
1	36396319	36396399	+	protein_coding	ENSG00000126070	AGO3	ENST00000324350
1	36396679	36397046	+	protein_coding	ENSG00000126070	AGO3	ENST00000373191
1	36396683	36397046	+	protein_coding	ENSG00000126070	AGO3	ENST00000397828
1	36396859	36397046	+	protein_coding	ENSG00000126070	AGO3	ENST00000246314
1	36549676	36549750	+	protein_coding	ENSG00000092850	TEKT2	ENST00000207457
1	36552852	36552912	+	protein_coding	ENSG00000092850	TEKT2	ENST00000473120
1	36554476	36554716	+	protein_coding	ENSG00000116863	ADPRHL2	ENST00000373178
1	36565651	36565850	-	protein_coding	ENSG00000171812	COL8A2	ENST00000303143
1	36590658	36590821	-	protein_coding	ENSG00000171812	COL8A2	ENST00000397799
1	36565796	36565850	-	protein_coding	ENSG00000171812	COL8A2	ENST00000481785
1	36614938	36615070	-	protein_coding	ENSG00000054116	TRAPPC3	ENST00000373166
1	36614861	36615052	-	protein_coding	ENSG00000054116	TRAPPC3	ENST00000373163
1	36614693	36615098	-	protein_coding	ENSG00000054116	TRAPPC3	ENST00000373162
1	36614938	36615097	-	protein_coding	ENSG00000054116	TRAPPC3	ENST00000373159
1	36621180	36621334	+	protein_coding	ENSG00000116871	MAP7D1	ENST00000429533
1	36621566	36622064	+	protein_coding	ENSG00000116871	MAP7D1	ENST00000316156
1	36621799	36622064	+	protein_coding	ENSG00000116871	MAP7D1	ENST00000373150
1	36621803	36622064	+	protein_coding	ENSG00000116871	MAP7D1	ENST00000373151
1	36622816	36622891	+	protein_coding	ENSG00000116871	MAP7D1	ENST00000530729
1	36642318	36642443	+	protein_coding	ENSG00000116871	MAP7D1	ENST00000530975
1	36643070	36643175	+	protein_coding	ENSG00000116871	MAP7D1	ENST00000373148
1	36690017	36690106	+	protein_coding	ENSG00000054118	THRAP3	ENST00000354618
1	36690033	36690106	+	protein_coding	ENSG00000054118	THRAP3	ENST00000469141
1	36690034	36690106	+	protein_coding	ENSG00000054118	THRAP3	ENST00000478853
1	36771988	36772025	+	protein_coding	ENSG00000214193	SH3D21	ENST00000373139
1	36771994	36772025	+	protein_coding	ENSG00000214193	SH3D21	ENST00000453908
1	36771994	36772025	+	protein_coding	ENSG00000214193	SH3D21	ENST00000426732
1	36772708	36772886	+	protein_coding	ENSG00000214193	SH3D21	ENST00000312808
1	36772711	36772886	+	protein_coding	ENSG00000214193	SH3D21	ENST00000505871
1	36789494	36789755	-	protein_coding	ENSG00000142694	EVA1B	ENST00000270824
1	36789335	36789670	+	protein_coding	ENSG00000116883	RP11-268J15.5	ENST00000373137
1	36826822	36826941	-	protein_coding	ENSG00000196182	STK40	ENST00000359297
1	36851324	36851485	-	protein_coding	ENSG00000196182	STK40	ENST00000373129
1	36851324	36851489	-	protein_coding	ENSG00000196182	STK40	ENST00000373130
1	36851324	36851497	-	protein_coding	ENSG00000196182	STK40	ENST00000373132
1	36863368	36863493	-	protein_coding	ENSG00000181817	LSM10	ENST00000315732
1	36887751	36887782	-	protein_coding	ENSG00000116885	OSCP1	ENST00000468441
1	36915859	36916052	-	protein_coding	ENSG00000116885	OSCP1	ENST00000235532
1	36915859	36916034	-	protein_coding	ENSG00000116885	OSCP1	ENST00000356637
1	36906420	36906576	-	protein_coding	ENSG00000116885	OSCP1	ENST00000433045
1	36915859	36915880	-	protein_coding	ENSG00000116885	OSCP1	ENST00000445843
1	36915859	36916086	-	protein_coding	ENSG00000116885	OSCP1	ENST00000315643
1	36915859	36916044	-	protein_coding	ENSG00000116885	OSCP1	ENST00000354267
1	36929747	36930038	-	protein_coding	ENSG00000116898	MRPS15	ENST00000373116
1	36948412	36948879	-	protein_coding	ENSG00000119535	CSF3R	ENST00000373106
1	36948412	36948879	-	protein_coding	ENSG00000119535	CSF3R	ENST00000373104
1	36948412	36948879	-	protein_coding	ENSG00000119535	CSF3R	ENST00000373103
1	36947079	36947120	-	protein_coding	ENSG00000119535	CSF3R	ENST00000361632
1	36937034	36937075	-	protein_coding	ENSG00000119535	CSF3R	ENST00000464465
1	36945034	36945097	-	protein_coding	ENSG00000119535	CSF3R	ENST00000331941
1	36945034	36945097	-	protein_coding	ENSG00000119535	CSF3R	ENST00000418048
1	36945034	36945097	-	protein_coding	ENSG00000119535	CSF3R	ENST00000338937
1	36945034	36945097	-	protein_coding	ENSG00000119535	CSF3R	ENST00000440588
1	36947380	36947652	-	protein_coding	ENSG00000119535	CSF3R	ENST00000533491
1	37499595	37499726	-	protein_coding	ENSG00000163873	GRIK3	ENST00000373091
1	37499595	37499730	-	protein_coding	ENSG00000163873	GRIK3	ENST00000373093
1	37940153	37940230	+	protein_coding	ENSG00000163874	ZC3H12A	ENST00000373087
1	37947291	37947436	+	protein_coding	ENSG00000163874	ZC3H12A	ENST00000471012
1	37980258	37980364	-	protein_coding	ENSG00000163875	MEAF6	ENST00000373075
1	37980258	37980375	-	protein_coding	ENSG00000163875	MEAF6	ENST00000296214
1	37979024	37979870	-	protein_coding	ENSG00000163875	MEAF6	ENST00000373074
1	37980258	37980364	-	protein_coding	ENSG00000163875	MEAF6	ENST00000373073
1	37980258	37980347	-	protein_coding	ENSG00000163875	MEAF6	ENST00000448519
1	38019607	38019903	-	protein_coding	ENSG00000163877	SNIP1	ENST00000296215
1	38022520	38022676	+	protein_coding	ENSG00000163879	DNALI1	ENST00000296218
1	38022607	38022676	+	protein_coding	ENSG00000163879	DNALI1	ENST00000541606
1	38061360	38061522	-	protein_coding	ENSG00000134697	GNL2	ENST00000373062
1	38048379	38048524	-	protein_coding	ENSG00000134697	GNL2	ENST00000538069
1	38100238	38100337	-	protein_coding	ENSG00000169218	RSPO1	ENST00000373059
1	38100238	38100337	-	protein_coding	ENSG00000169218	RSPO1	ENST00000401070
1	38100238	38100491	-	protein_coding	ENSG00000169218	RSPO1	ENST00000356545
1	38100238	38100337	-	protein_coding	ENSG00000169218	RSPO1	ENST00000401071
1	38100238	38100595	-	protein_coding	ENSG00000169218	RSPO1	ENST00000401069
1	38100238	38100288	-	protein_coding	ENSG00000169218	RSPO1	ENST00000401068
1	38156006	38156192	-	protein_coding	ENSG00000116922	C1orf109	ENST00000358011
1	38155888	38156176	-	protein_coding	ENSG00000116922	C1orf109	ENST00000464085
1	38157861	38157895	-	protein_coding	ENSG00000116922	C1orf109	ENST00000491981
1	38155888	38156192	-	protein_coding	ENSG00000116922	C1orf109	ENST00000461359
1	38157702	38157877	-	protein_coding	ENSG00000116922	C1orf109	ENST00000477060
1	38155674	38156181	-	protein_coding	ENSG00000116922	C1orf109	ENST00000486637
1	38157702	38157914	-	protein_coding	ENSG00000116922	C1orf109	ENST00000488137
1	38158090	38158456	+	protein_coding	ENSG00000134690	CDCA8	ENST00000373055
1	38158153	38158250	+	protein_coding	ENSG00000134690	CDCA8	ENST00000327331
1	38222208	38222363	-	protein_coding	ENSG00000183317	EPHA10	ENST00000330210
1	38230633	38230738	-	protein_coding	ENSG00000183317	EPHA10	ENST00000427468
1	38218548	38218578	-	protein_coding	ENSG00000183317	EPHA10	ENST00000540011
1	38230633	38230738	-	protein_coding	ENSG00000183317	EPHA10	ENST00000373048
1	38230633	38230805	-	protein_coding	ENSG00000183317	EPHA10	ENST00000319637
1	38259474	38260404	+	protein_coding	ENSG00000185090	MANEAL	ENST00000373045
1	38259555	38260404	+	protein_coding	ENSG00000185090	MANEAL	ENST00000397631
1	38260155	38260404	+	protein_coding	ENSG00000185090	MANEAL	ENST00000532512
1	38261080	38261304	+	protein_coding	ENSG00000185090	MANEAL	ENST00000525897
1	38261160	38261518	+	protein_coding	ENSG00000185090	MANEAL	ENST00000329006
1	38273464	38273857	-	protein_coding	ENSG00000196449	YRDC	ENST00000373044
1	38272651	38274404	+	protein_coding	ENSG00000197982	C1orf122	ENST00000373043
1	38273419	38273978	+	protein_coding	ENSG00000197982	C1orf122	ENST00000468084
1	38273818	38274111	+	protein_coding	ENSG00000197982	C1orf122	ENST00000373042
1	38274082	38274404	+	protein_coding	ENSG00000197982	C1orf122	ENST00000446260
1	38325203	38325292	-	protein_coding	ENSG00000188786	MTF1	ENST00000373036
1	38293873	38293886	-	protein_coding	ENSG00000230610	AL929472.1	ENST00000448796
1	38397345	38397421	-	protein_coding	ENSG00000204084	INPP5B	ENST00000373027
1	38412662	38412729	-	protein_coding	ENSG00000204084	INPP5B	ENST00000373023
1	38411924	38411981	-	protein_coding	ENSG00000204084	INPP5B	ENST00000373026
1	38412662	38412723	-	protein_coding	ENSG00000204084	INPP5B	ENST00000373024
1	38355229	38355345	-	protein_coding	ENSG00000204084	INPP5B	ENST00000458109
1	38411924	38412006	-	protein_coding	ENSG00000204084	INPP5B	ENST00000373021
1	38455542	38456593	-	protein_coding	ENSG00000183431	SF3A3	ENST00000373019
1	38455542	38455659	-	protein_coding	ENSG00000183431	SF3A3	ENST00000448721
1	38471029	38471177	-	protein_coding	ENSG00000183386	FHL3	ENST00000373016
1	38478414	38478537	+	protein_coding	ENSG00000183520	UTP11L	ENST00000373014
1	38478451	38478537	+	protein_coding	ENSG00000183520	UTP11L	ENST00000537711
1	38509523	38512450	-	protein_coding	ENSG00000185668	POU3F1	ENST00000373012
1	39325082	39325495	-	protein_coding	ENSG00000116954	RRAGC	ENST00000373001
1	39338963	39339777	-	protein_coding	ENSG00000214114	MYCBP	ENST00000397572
1	39347104	39347285	-	protein_coding	ENSG00000131233	GJA9	ENST00000454994
1	39347104	39347289	-	protein_coding	ENSG00000131233	GJA9	ENST00000357771
1	39340123	39342023	-	protein_coding	ENSG00000131233	GJA9	ENST00000360786
1	39407354	39407456	-	protein_coding	ENSG00000158315	RHBDL2	ENST00000372990
1	39391626	39392509	-	protein_coding	ENSG00000158315	RHBDL2	ENST00000289248
1	39391626	39392509	-	protein_coding	ENSG00000158315	RHBDL2	ENST00000538156
1	39395067	39395185	-	protein_coding	ENSG00000158315	RHBDL2	ENST00000372985
1	39407354	39407471	-	protein_coding	ENSG00000158315	RHBDL2	ENST00000540558
1	39456895	39457272	+	protein_coding	ENSG00000174574	AKIRIN1	ENST00000432648
1	39456960	39457272	+	protein_coding	ENSG00000174574	AKIRIN1	ENST00000446189
1	39456960	39457272	+	protein_coding	ENSG00000174574	AKIRIN1	ENST00000372984
1	39457168	39457272	+	protein_coding	ENSG00000174574	AKIRIN1	ENST00000531822
1	39491990	39492074	+	protein_coding	ENSG00000168653	NDUFS5	ENST00000372969
1	39491990	39492070	+	protein_coding	ENSG00000168653	NDUFS5	ENST00000372967
1	39546988	39547215	+	protein_coding	ENSG00000127603	MACF1	ENST00000484793
1	39547089	39547215	+	protein_coding	ENSG00000127603	MACF1	ENST00000602421
1	39549034	39549089	+	protein_coding	ENSG00000127603	MACF1	ENST00000545844
1	39549734	39550110	+	protein_coding	ENSG00000127603	MACF1	ENST00000567887
1	39549804	39550110	+	protein_coding	ENSG00000127603	MACF1	ENST00000372915
1	39549839	39550110	+	protein_coding	ENSG00000127603	MACF1	ENST00000361689
1	39549839	39550110	+	protein_coding	ENSG00000127603	MACF1	ENST00000317713
1	39549839	39550110	+	protein_coding	ENSG00000127603	MACF1	ENST00000539005
1	39571083	39571389	+	protein_coding	ENSG00000127603	MACF1	ENST00000524432
1	39669918	39670803	+	protein_coding	ENSG00000127603	MACF1	ENST00000564288
1	39670367	39670803	+	protein_coding	ENSG00000127603	MACF1	ENST00000494012
1	39670423	39670803	+	protein_coding	ENSG00000127603	MACF1	ENST00000536367
1	39734199	39735359	+	protein_coding	ENSG00000127603	MACF1	ENST00000530262
1	39765986	39766034	+	protein_coding	ENSG00000127603	MACF1	ENST00000372925
1	39796810	39802325	+	protein_coding	ENSG00000127603	MACF1	ENST00000289893
1	39880072	39880149	+	protein_coding	ENSG00000127603	MACF1	ENST00000482035
1	39919509	39919522	+	protein_coding	ENSG00000127603	MACF1	ENST00000360115
1	39924795	39924921	+	protein_coding	ENSG00000127603	MACF1	ENST00000446276
1	39926419	39926466	+	protein_coding	ENSG00000127603	MACF1	ENST00000442046
1	39927692	39927709	+	protein_coding	ENSG00000127603	MACF1	ENST00000422234
1	39876151	39882154	+	protein_coding	ENSG00000255103	KIAA0754	ENST00000530275
1	39957318	39957997	+	protein_coding	ENSG00000183682	BMP8A	ENST00000331593
1	40030095	40030163	-	protein_coding	ENSG00000090621	PABPC4	ENST00000437136
1	40041431	40041925	-	protein_coding	ENSG00000090621	PABPC4	ENST00000372862
1	40041431	40042073	-	protein_coding	ENSG00000090621	PABPC4	ENST00000372858
1	40041431	40042416	-	protein_coding	ENSG00000090621	PABPC4	ENST00000372857
1	40041431	40042423	-	protein_coding	ENSG00000090621	PABPC4	ENST00000372856
1	40027745	40027860	-	protein_coding	ENSG00000090621	PABPC4	ENST00000530186
1	40038065	40038156	-	protein_coding	ENSG00000090621	PABPC4	ENST00000421687
1	40034474	40034529	-	protein_coding	ENSG00000090621	PABPC4	ENST00000527718
1	40038065	40038090	-	protein_coding	ENSG00000090621	PABPC4	ENST00000474378
1	40042224	40042462	-	protein_coding	ENSG00000090621	PABPC4	ENST00000451091
1	40042224	40042459	-	protein_coding	ENSG00000090621	PABPC4	ENST00000531243
1	40105218	40105617	-	protein_coding	ENSG00000163909	HEYL	ENST00000372852
1	40098584	40098672	-	protein_coding	ENSG00000163909	HEYL	ENST00000535435
1	40137576	40137710	-	protein_coding	ENSG00000116981	NT5C1A	ENST00000235628
1	40156978	40157361	-	protein_coding	ENSG00000116983	HPCAL4	ENST00000372844
1	40157854	40158260	+	protein_coding	ENSG00000084072	PPIE	ENST00000470018
1	40204554	40204603	+	protein_coding	ENSG00000084072	PPIE	ENST00000324379
1	40204557	40204603	+	protein_coding	ENSG00000084072	PPIE	ENST00000356511
1	40204573	40204603	+	protein_coding	ENSG00000084072	PPIE	ENST00000497370
1	40204573	40204603	+	protein_coding	ENSG00000084072	PPIE	ENST00000470213
1	40204573	40204603	+	protein_coding	ENSG00000084072	PPIE	ENST00000372835
1	40204573	40204603	+	protein_coding	ENSG00000084072	PPIE	ENST00000372830
1	40253824	40254533	-	protein_coding	ENSG00000116985	BMP8B	ENST00000372827
1	40253824	40254521	-	protein_coding	ENSG00000116985	BMP8B	ENST00000397360
1	40235195	40237020	-	protein_coding	ENSG00000198754	OXCT2	ENST00000327582
1	40348990	40349163	-	protein_coding	ENSG00000043514	TRIT1	ENST00000441669
1	40348990	40349178	-	protein_coding	ENSG00000043514	TRIT1	ENST00000316891
1	40348990	40349178	-	protein_coding	ENSG00000043514	TRIT1	ENST00000372818
1	40348990	40349106	-	protein_coding	ENSG00000043514	TRIT1	ENST00000545233
1	40348990	40349106	-	protein_coding	ENSG00000043514	TRIT1	ENST00000537440
1	40348990	40349106	-	protein_coding	ENSG00000043514	TRIT1	ENST00000537223
1	40348990	40349106	-	protein_coding	ENSG00000043514	TRIT1	ENST00000541099
1	40348990	40349176	-	protein_coding	ENSG00000043514	TRIT1	ENST00000544981
1	40367480	40367685	-	protein_coding	ENSG00000116990	MYCL	ENST00000397332
1	40366611	40367554	-	protein_coding	ENSG00000116990	MYCL	ENST00000372816
1	40367480	40367591	-	protein_coding	ENSG00000116990	MYCL	ENST00000372815
1	40367480	40367687	-	protein_coding	ENSG00000116990	MYCL	ENST00000429311
1	40367813	40367928	-	protein_coding	ENSG00000116990	MYCL	ENST00000450953
1	40420802	40421057	+	protein_coding	ENSG00000168389	MFSD2A	ENST00000372811
1	40420817	40421057	+	protein_coding	ENSG00000168389	MFSD2A	ENST00000420632
1	40420818	40421051	+	protein_coding	ENSG00000168389	MFSD2A	ENST00000434861
1	40420822	40421057	+	protein_coding	ENSG00000168389	MFSD2A	ENST00000372809
1	40505905	40506455	+	protein_coding	ENSG00000131236	CAP1	ENST00000372797
1	40505912	40506455	+	protein_coding	ENSG00000131236	CAP1	ENST00000372802
1	40505995	40506139	+	protein_coding	ENSG00000131236	CAP1	ENST00000449311
1	40506255	40506455	+	protein_coding	ENSG00000131236	CAP1	ENST00000421589
[truncated: 88,283 more rows]
