# Supplementary material for: Characteristics, origin, and potential for cancer diagnostics of ultrashort plasma cell-free DNA
Source: HighWire-hosted journal article supplement (doi:10.1101/gr.275691.121), 2021-12-20
Supplement: Supplemental_Table_S3.xlsx [file Supplemental_Table_S3.xlsx]

## Sheet: Sheet1
Supplemental_Table_S3: List of cell-specific TSS regions
#chr: chromosome
#start_position: beginning of selected region
#end_position: end of selected region
#gene: corresponding gene for the region
#cell_type: cell-type
#strand: stranding sense
chr	start_position	end_position	gene	cell_type	strand
chr1	1934276	1936276	KIAA1751	erythrocyte_progenitor	minus
chr1	2705230	2707230	TTC34	erythrocyte_progenitor	minus
chr1	3527059	3529059	MEGF6	erythrocyte_progenitor	minus
chr1	17444948	17446948	PADI2	erythrocyte_progenitor	minus
chr1	25746363	25748363	RHCE	erythrocyte_progenitor	minus
chr1	31229683	31231683	LAPTM5	erythrocyte_progenitor	minus
chr1	33167361	33169361	SYNC	erythrocyte_progenitor	minus
chr1	33335414	33339082	FNDC5	erythrocyte_progenitor	minus
chr1	36947915	36949915	CSF3R	erythrocyte_progenitor	minus
chr1	38229824	38231824	EPHA10	erythrocyte_progenitor	minus
chr1	38679439	38681439	LOC339442	erythrocyte_progenitor	minus
chr1	43832409	43834745	ELOVL1	erythrocyte_progenitor	minus
chr1	45476027	45478027	HECTD3	erythrocyte_progenitor	minus
chr1	63781901	63783901	LINC00466	erythrocyte_progenitor	minus
chr1	71512491	71514491	PTGER3	erythrocyte_progenitor	minus
chr1	99469449	99471449	LPPR5	erythrocyte_progenitor	minus
chr1	113248678	113251025	RHOC	erythrocyte_progenitor	minus
chr1	115631121	115633121	TSPAN2	erythrocyte_progenitor	minus
chr1	145826103	145828103	GPR89A	erythrocyte_progenitor	minus
chr1	151687792	151690290	CELF3	erythrocyte_progenitor	minus
chr1	153362664	153364664	S100A8	erythrocyte_progenitor	minus
chr1	154126592	154128592	NUP210L	erythrocyte_progenitor	minus
chr1	155292938	155294938	RUSC1-AS1	erythrocyte_progenitor	minus
chr1	156050789	156052789	MEX3A	erythrocyte_progenitor	minus
chr1	157014162	157016162	ARHGEF11	erythrocyte_progenitor	minus
chr1	159171212	159173212	LOC100131825	erythrocyte_progenitor	minus
chr1	159283449	159285449	OR10J3	erythrocyte_progenitor	minus
chr1	160680641	160682641	CD48	erythrocyte_progenitor	minus
chr1	160853960	160855960	ITLN1	erythrocyte_progenitor	minus
chr1	161146758	161148758	B4GALT3	erythrocyte_progenitor	minus
chr1	164742878	164744878	LOC100505795	erythrocyte_progenitor	minus
chr1	171710379	171712379	VAMP4	erythrocyte_progenitor	minus
chr1	175711752	175713752	TNR	erythrocyte_progenitor	minus
chr1	178006142	178008142	LOC730102	erythrocyte_progenitor	minus
chr1	182557394	182559394	RNASEL	erythrocyte_progenitor	minus
chr1	196576499	196578499	KCNT2	erythrocyte_progenitor	minus
chr1	203154922	203156922	CHI3L1	erythrocyte_progenitor	minus
chr1	203273453	203275453	LOC730227	erythrocyte_progenitor	minus
chr1	204182220	204184220	GOLT1A	erythrocyte_progenitor	minus
chr1	204328057	204330057	PLEKHA6	erythrocyte_progenitor	minus
chr1	204653481	204655597	LRRN2	erythrocyte_progenitor	minus
chr1	244005584	244007886	AKT3	erythrocyte_progenitor	minus
chr1	248004198	248006198	OR11L1	erythrocyte_progenitor	minus
chr10	15760770	15762770	ITGA8	erythrocyte_progenitor	minus
chr10	21813611	21815611	C10orf140	erythrocyte_progenitor	minus
chr10	45473330	45475330	C10orf10	erythrocyte_progenitor	minus
chr10	54530460	54532460	MBL2	erythrocyte_progenitor	minus
chr10	73847531	73849790	SPOCK2	erythrocyte_progenitor	minus
chr10	89101315	89103315	LOC728190	erythrocyte_progenitor	minus
chr10	95359993	95361993	RBP4	erythrocyte_progenitor	minus
chr10	103577222	103579222	MGEA5	erythrocyte_progenitor	minus
chr10	104952063	104954063	NT5C2	erythrocyte_progenitor	minus
chr10	105211162	105213162	CALHM2	erythrocyte_progenitor	minus
chr10	115612859	115614859	DCLRE1A	erythrocyte_progenitor	minus
chr10	118764088	118766088	KIAA1598	erythrocyte_progenitor	minus
chr10	120354160	120356160	PRLHR	erythrocyte_progenitor	minus
chr11	298526	300526	IFITM5	erythrocyte_progenitor	minus
chr11	1770824	1772824	IFITM10	erythrocyte_progenitor	minus
chr11	2984123	2986123	SNORA54	erythrocyte_progenitor	minus
chr11	3252616	3254616	MRGPRE	erythrocyte_progenitor	minus
chr11	5172599	5174599	OR52A1	erythrocyte_progenitor	minus
chr11	11373904	11375904	CSNK2A1P	erythrocyte_progenitor	minus
chr11	11677269	11679269	MIR4299	erythrocyte_progenitor	minus
chr11	18955549	18957549	MRGPRX1	erythrocyte_progenitor	minus
chr11	57003927	57005927	APLNR	erythrocyte_progenitor	minus
chr11	57518253	57520253	BTBD18	erythrocyte_progenitor	minus
chr11	58610997	58612997	GLYATL2	erythrocyte_progenitor	minus
chr11	63380909	63382941	PLA2G16	erythrocyte_progenitor	minus
chr11	64510630	64513928	RASGRP2	erythrocyte_progenitor	minus
chr11	65324699	65326699	LTBP3	erythrocyte_progenitor	minus
chr11	67204153	67206153	PTPRCAP	erythrocyte_progenitor	minus
chr11	67979784	67981784	SUV420H1	erythrocyte_progenitor	minus
chr11	69589171	69591171	FGF4	erythrocyte_progenitor	minus
chr11	96075344	96077344	MAML2	erythrocyte_progenitor	minus
chr11	102400478	102402478	MMP7	erythrocyte_progenitor	minus
chr11	122072770	122074770	MIR100HG	erythrocyte_progenitor	minus
chr11	134093426	134095426	NCAPD3	erythrocyte_progenitor	minus
chr12	6232836	6234836	VWF	erythrocyte_progenitor	minus
chr12	6981449	6983521	SPSB2	erythrocyte_progenitor	minus
chr12	8024495	8026495	SLC2A14	erythrocyte_progenitor	minus
chr12	10572194	10574194	KLRC3	erythrocyte_progenitor	minus
chr12	10874953	10876953	CSDA	erythrocyte_progenitor	minus
chr12	14923065	14925065	HIST4H4	erythrocyte_progenitor	minus
chr12	14995413	14997413	ART4	erythrocyte_progenitor	minus
chr12	47609226	47611226	LOC100233209	erythrocyte_progenitor	minus
chr12	49350252	49352252	ARF3	erythrocyte_progenitor	minus
chr12	53096247	53098247	KRT77	erythrocyte_progenitor	minus
chr12	54474607	54476607	LOC100240735	erythrocyte_progenitor	minus
chr12	56121910	56123910	CD63	erythrocyte_progenitor	minus
chr12	56319909	56322697	WIBG	erythrocyte_progenitor	minus
chr12	57399297	57401297	ZBTB39	erythrocyte_progenitor	minus
chr12	63545590	63547590	AVPR1A	erythrocyte_progenitor	minus
chr12	75602511	75604511	KCNC2	erythrocyte_progenitor	minus
chr12	102871429	102875378	IGF1	erythrocyte_progenitor	minus
chr12	109490770	109492770	LOC100131733	erythrocyte_progenitor	minus
chr12	113840692	113842692	SDS	erythrocyte_progenitor	minus
chr13	37493409	37495409	SMAD9	erythrocyte_progenitor	minus
chr13	40176356	40178356	LHFP	erythrocyte_progenitor	minus
chr13	46188874	46190874	FAM194B	erythrocyte_progenitor	minus
chr13	61988655	61990655	PCDH20	erythrocyte_progenitor	minus
chr13	84455528	84457528	SLITRK1	erythrocyte_progenitor	minus
chr13	88322218	88324218	MIR4500HG	erythrocyte_progenitor	minus
chr14	37640865	37642865	SLC25A21	erythrocyte_progenitor	minus
chr14	55343911	55345911	MIR4308	erythrocyte_progenitor	minus
chr14	65408623	65410623	GPX2	erythrocyte_progenitor	minus
chr14	74226001	74228001	C14orf43	erythrocyte_progenitor	minus
chr14	104582840	104584840	MIR3545	erythrocyte_progenitor	minus
chr14	105443694	105445694	AHNAK2	erythrocyte_progenitor	minus
chr15	23207357	23209357	WHAMMP3	erythrocyte_progenitor	minus
chr15	28566295	28568295	HERC2	erythrocyte_progenitor	minus
chr15	30684864	30686864	CHRFAM7A	erythrocyte_progenitor	minus
chr15	31946542	31948542	OTUD7A	erythrocyte_progenitor	minus
chr15	40632168	40634168	C15orf52	erythrocyte_progenitor	minus
chr15	42840002	42842002	LRRC57	erythrocyte_progenitor	minus
chr15	48469558	48471558	MYEF2	erythrocyte_progenitor	minus
chr15	48936985	48938985	FBN1	erythrocyte_progenitor	minus
chr15	51913967	51915967	DMXL2	erythrocyte_progenitor	minus
chr15	52586995	52588995	MYO5C	erythrocyte_progenitor	minus
chr15	75134552	75136552	ULK3	erythrocyte_progenitor	minus
chr15	76303785	76305785	NRG4	erythrocyte_progenitor	minus
chr15	79575287	79577287	LOC729911	erythrocyte_progenitor	minus
chr15	90197682	90199682	KIF7	erythrocyte_progenitor	minus
chr16	1274254	1276254	TPSG1	erythrocyte_progenitor	minus
chr16	1478345	1480345	C16orf91	erythrocyte_progenitor	minus
chr16	1933232	1935232	LINC00254	erythrocyte_progenitor	minus
chr16	11349039	11351039	SOCS1	erythrocyte_progenitor	minus
chr16	30021401	30023401	DOC2A	erythrocyte_progenitor	minus
chr16	30545194	30547194	ZNF747	erythrocyte_progenitor	minus
chr16	47494015	47496015	ITFG1	erythrocyte_progenitor	minus
chr16	56700977	56702977	MT1G	erythrocyte_progenitor	minus
chr16	69165071	69167493	CHTF8	erythrocyte_progenitor	minus
chr16	70718954	70720954	MTSS1L	erythrocyte_progenitor	minus
chr16	71263569	71265625	HYDIN	erythrocyte_progenitor	minus
chr16	75149670	75151670	LDHD	erythrocyte_progenitor	minus
chr16	90113033	90115191	LOC100130015	erythrocyte_progenitor	minus
chr17	1552392	1554392	RILP	erythrocyte_progenitor	minus
chr17	3300704	3302704	OR1E1	erythrocyte_progenitor	minus
chr17	4805369	4807369	CHRNE	erythrocyte_progenitor	minus
chr17	4850825	4852825	PFN1	erythrocyte_progenitor	minus
chr17	6615740	6617740	SLC13A5	erythrocyte_progenitor	minus
chr17	8126361	8128361	LINC00324	erythrocyte_progenitor	minus
chr17	8262859	8264859	LOC100128288	erythrocyte_progenitor	minus
chr17	10632646	10634646	TMEM220	erythrocyte_progenitor	minus
chr17	25620022	25622022	MIR4522	erythrocyte_progenitor	minus
chr17	26940211	26942211	SGK494	erythrocyte_progenitor	minus
chr17	27052230	27054949	TLCD1	erythrocyte_progenitor	minus
chr17	27893042	27895042	ABHD15	erythrocyte_progenitor	minus
chr17	29640130	29642130	EVI2B	erythrocyte_progenitor	minus
chr17	33774856	33776856	SLFN13	erythrocyte_progenitor	minus
chr17	38072793	38075903	GSDMB	erythrocyte_progenitor	minus
chr17	38255973	38257973	NR1D1	erythrocyte_progenitor	minus
chr17	42766165	42768165	CCDC43	erythrocyte_progenitor	minus
chr17	42975993	42977993	EFTUD2	erythrocyte_progenitor	minus
chr17	43338479	43340479	TEX34	erythrocyte_progenitor	minus
chr17	74022507	74024507	EVPL	erythrocyte_progenitor	minus
chr17	74349230	74351230	PRPSAP1	erythrocyte_progenitor	minus
chr17	74706056	74708056	MXRA7	erythrocyte_progenitor	minus
chr17	76355158	76357158	SOCS3	erythrocyte_progenitor	minus
chr17	76975061	76977061	LGALS3BP	erythrocyte_progenitor	minus
chr17	78008647	78010647	TBC1D16	erythrocyte_progenitor	minus
chr17	79790167	79792167	FAM195B	erythrocyte_progenitor	minus
chr17	79791926	79793926	PPP1R27	erythrocyte_progenitor	minus
chr18	31019045	31021685	C18orf34	erythrocyte_progenitor	minus
chr18	56939625	56941625	RAX	erythrocyte_progenitor	minus
chr18	58039001	58041001	MC4R	erythrocyte_progenitor	minus
chr18	70210723	70212723	CBLN2	erythrocyte_progenitor	minus
chr19	1512188	1514188	ADAMTSL5	erythrocyte_progenitor	minus
chr19	4539036	4541036	LRG1	erythrocyte_progenitor	minus
chr19	12145525	12147525	ZNF433	erythrocyte_progenitor	minus
chr19	12162782	12164782	ZNF878	erythrocyte_progenitor	minus
chr19	12266546	12268546	ZNF625-ZNF20	erythrocyte_progenitor	minus
chr19	12266546	12268546	ZNF625	erythrocyte_progenitor	minus
chr19	12404714	12406714	ZNF44	erythrocyte_progenitor	minus
chr19	13212974	13214974	LYL1	erythrocyte_progenitor	minus
chr19	13259987	13261987	STX10	erythrocyte_progenitor	minus
chr19	14116134	14118134	RFX1	erythrocyte_progenitor	minus
chr19	14784730	14786730	EMR3	erythrocyte_progenitor	minus
chr19	15589315	15591315	PGLYRP2	erythrocyte_progenitor	minus
chr19	16044676	16046676	CYP4F11	erythrocyte_progenitor	minus
chr19	17136625	17138625	CPAMD8	erythrocyte_progenitor	minus
chr19	17487137	17489137	PLVAP	erythrocyte_progenitor	minus
chr19	22604148	22606148	ZNF98	erythrocyte_progenitor	minus
chr19	33554824	33556824	RHPN2	erythrocyte_progenitor	minus
chr19	36235336	36237336	U2AF1L4	erythrocyte_progenitor	minus
chr19	39693906	39695906	SYCN	erythrocyte_progenitor	minus
chr19	41195556	41197556	NUMBL	erythrocyte_progenitor	minus
chr19	44616336	44618336	LOC100379224	erythrocyte_progenitor	minus
chr19	46475657	46477657	NOVA2	erythrocyte_progenitor	minus
chr19	47332961	47334961	SNAR-E	erythrocyte_progenitor	minus
chr19	50641494	50643494	SNAR-B2	erythrocyte_progenitor	minus
chr19	50641494	50643494	SNAR-B1	erythrocyte_progenitor	minus
chr19	50642577	50644577	SNAR-D	erythrocyte_progenitor	minus
chr19	55739632	55741632	TMEM86B	erythrocyte_progenitor	minus
chr19	55835708	55837708	TMEM150B	erythrocyte_progenitor	minus
chr19	55953230	55955230	SHISA7	erythrocyte_progenitor	minus
chr19	56987770	56989770	ZNF667	erythrocyte_progenitor	minus
chr2	27717126	27719126	FNDC4	erythrocyte_progenitor	minus
chr2	36824332	36826332	FEZ2	erythrocyte_progenitor	minus
chr2	37898326	37900326	CDC42EP3	erythrocyte_progenitor	minus
chr2	43018751	43020751	HAAO	erythrocyte_progenitor	minus
chr2	44585888	44590001	PREPL	erythrocyte_progenitor	minus
chr2	60779633	60781633	BCL11A	erythrocyte_progenitor	minus
chr2	62732604	62734604	TMEM17	erythrocyte_progenitor	minus
chr2	67441451	67443451	LOC644838	erythrocyte_progenitor	minus
chr2	68546183	68548183	CNRIP1	erythrocyte_progenitor	minus
chr2	73927467	73929467	NAT8B	erythrocyte_progenitor	minus
chr2	74755974	74757974	AUP1	erythrocyte_progenitor	minus
chr2	96803175	96805175	ASTL	erythrocyte_progenitor	minus
chr2	113593356	113595356	IL1B	erythrocyte_progenitor	minus
chr2	136742222	136744222	DARS	erythrocyte_progenitor	minus
chr2	160472059	160474059	BAZ2B	erythrocyte_progenitor	minus
chr2	165696928	165698928	COBLL1	erythrocyte_progenitor	minus
chr2	167231497	167233497	SCN9A	erythrocyte_progenitor	minus
chr2	178127617	178130859	NFE2L2	erythrocyte_progenitor	minus
chr2	180128350	180130350	SESTD1	erythrocyte_progenitor	minus
chr2	183386253	183388465	PDE1A	erythrocyte_progenitor	minus
chr2	190444537	190446537	SLC40A1	erythrocyte_progenitor	minus
chr2	197674000	197676000	C2orf66	erythrocyte_progenitor	minus
chr2	202221101	202223101	ALS2CR12	erythrocyte_progenitor	minus
chr2	208988313	208990313	CRYGD	erythrocyte_progenitor	minus
chr2	218807796	218809796	TNS1	erythrocyte_progenitor	minus
chr2	241621317	241623317	AQP12B	erythrocyte_progenitor	minus
chr20	589910	591910	TCF15	erythrocyte_progenitor	minus
chr20	3387309	3389309	C20orf194	erythrocyte_progenitor	minus
chr20	4228659	4230659	ADRA1D	erythrocyte_progenitor	minus
chr20	5484242	5486242	LOC149837	erythrocyte_progenitor	minus
chr20	10653694	10655694	JAG1	erythrocyte_progenitor	minus
chr20	11253031	11255031	LOC339593	erythrocyte_progenitor	minus
chr20	23112273	23114273	LOC200261	erythrocyte_progenitor	minus
chr20	23617574	23619574	CST3	erythrocyte_progenitor	minus
chr20	26187914	26189914	MIR663A	erythrocyte_progenitor	minus
chr20	26188869	26190869	LOC284801	erythrocyte_progenitor	minus
chr20	37057447	37059447	SNORA71C	erythrocyte_progenitor	minus
chr20	39316876	39318876	MAFB	erythrocyte_progenitor	minus
chr20	44258907	44260907	WFDC9	erythrocyte_progenitor	minus
chr20	48098181	48100181	KCNB1	erythrocyte_progenitor	minus
chr20	49252426	49254426	FAM65C	erythrocyte_progenitor	minus
chr20	55933878	55935878	MTRNR2L3	erythrocyte_progenitor	minus
chr20	60794323	60796323	HRH3	erythrocyte_progenitor	minus
chr21	46073576	46075576	KRTAP12-4	erythrocyte_progenitor	minus
chr21	46492126	46494126	SSR4P1	erythrocyte_progenitor	minus
chr22	21367576	21369576	MGC16703	erythrocyte_progenitor	minus
chr22	23743799	23745799	ZDHHC8P1	erythrocyte_progenitor	minus
chr22	24640110	24642110	GGT5	erythrocyte_progenitor	minus
chr22	24988035	24990035	FAM211B	erythrocyte_progenitor	minus
chr22	30661829	30663829	OSM	erythrocyte_progenitor	minus
chr22	30900698	30902698	SEC14L4	erythrocyte_progenitor	minus
chr22	37402877	37404877	TEX33	erythrocyte_progenitor	minus
chr22	41208962	41210962	MIR4766	erythrocyte_progenitor	minus
chr22	43484434	43486434	TTLL1	erythrocyte_progenitor	minus
chr22	46449024	46451024	C22orf26	erythrocyte_progenitor	minus
chr3	4792274	4794274	EGOT	erythrocyte_progenitor	minus
chr3	8810300	8812300	OXTR	erythrocyte_progenitor	minus
chr3	10546268	10548268	ATP2B2	erythrocyte_progenitor	minus
chr3	24535313	24537313	THRB	erythrocyte_progenitor	minus
chr3	30935153	30937153	GADL1	erythrocyte_progenitor	minus
chr3	38177733	38179733	ACAA1	erythrocyte_progenitor	minus
chr3	46758373	46760373	PRSS50	erythrocyte_progenitor	minus
chr3	49169599	49171599	LAMB2	erythrocyte_progenitor	minus
chr3	49459111	49461111	AMT	erythrocyte_progenitor	minus
chr3	50604223	50606223	C3orf18	erythrocyte_progenitor	minus
chr3	50607458	50609458	C3orf18	erythrocyte_progenitor	minus
chr3	52259179	52261179	TLR9	erythrocyte_progenitor	minus
chr3	53163470	53165470	RFT1	erythrocyte_progenitor	minus
chr3	57198403	57200403	IL17RD	erythrocyte_progenitor	minus
chr3	57529071	57531071	DNAH12	erythrocyte_progenitor	minus
chr3	62860064	62862064	CADPS	erythrocyte_progenitor	minus
chr3	100711334	100713334	ABI3BP	erythrocyte_progenitor	minus
chr3	109055419	109057419	DPPA4	erythrocyte_progenitor	minus
chr3	113896899	113898899	DRD3	erythrocyte_progenitor	minus
chr3	113955425	113957425	ZNF80	erythrocyte_progenitor	minus
chr3	133647656	133649656	C3orf36	erythrocyte_progenitor	minus
chr3	145967651	145969966	PLSCR4	erythrocyte_progenitor	minus
chr3	148803341	148805341	HLTF	erythrocyte_progenitor	minus
chr3	169529574	169531574	LRRC34	erythrocyte_progenitor	minus
chr3	183734727	183736727	ABCC5	erythrocyte_progenitor	minus
chr3	187387201	187389201	SST	erythrocyte_progenitor	minus
chr3	189837908	189841226	LEPREL1	erythrocyte_progenitor	minus
chr3	191047325	191049325	UTS2D	erythrocyte_progenitor	minus
chr3	193720448	193722448	LOC647323	erythrocyte_progenitor	minus
chr4	1201750	1203750	SPON2	erythrocyte_progenitor	minus
chr4	1201750	1203750	LOC100130872	erythrocyte_progenitor	minus
chr4	39459207	39461568	RPL9	erythrocyte_progenitor	minus
chr4	42153895	42155895	BEND4	erythrocyte_progenitor	minus
chr4	68994587	68996587	TMPRSS11F	erythrocyte_progenitor	minus
chr4	77068655	77070655	NUP54	erythrocyte_progenitor	minus
chr4	77327458	77329458	CCDC158	erythrocyte_progenitor	minus
chr4	89079011	89081011	ABCG2	erythrocyte_progenitor	minus
chr4	90757127	90760447	SNCA	erythrocyte_progenitor	minus
chr4	99849243	99852786	EIF4E	erythrocyte_progenitor	minus
chr4	110722335	110724335	CFI	erythrocyte_progenitor	minus
chr4	142053616	142055616	RNF150	erythrocyte_progenitor	minus
chr4	144825716	144827716	GYPE	erythrocyte_progenitor	minus
chr4	144939496	144941496	GYPB	erythrocyte_progenitor	minus
chr4	145060904	145062904	GYPA	erythrocyte_progenitor	minus
chr4	164252947	164254947	NPY1R	erythrocyte_progenitor	minus
chr4	171010183	171012372	AADAT	erythrocyte_progenitor	minus
chr4	175749465	175751465	GLRA3	erythrocyte_progenitor	minus
chr5	1111172	1113172	SLC12A7	erythrocyte_progenitor	minus
chr5	16178897	16180897	2011-03-01	erythrocyte_progenitor	minus
chr5	16935385	16937385	MYO10	erythrocyte_progenitor	minus
chr5	35937737	35939881	CAPSL	erythrocyte_progenitor	minus
chr5	76382030	76384030	ZBED3	erythrocyte_progenitor	minus
chr5	79945854	79947854	MTRNR2L2	erythrocyte_progenitor	minus
chr5	89311537	89313537	MIR3660	erythrocyte_progenitor	minus
chr5	102897490	102899490	NUDT12	erythrocyte_progenitor	minus
chr5	107716799	107718799	FBXL17	erythrocyte_progenitor	minus
chr5	115151405	115153405	CDO1	erythrocyte_progenitor	minus
chr5	125930082	125932082	ALDH7A1	erythrocyte_progenitor	minus
chr5	131346355	131348761	ACSL6	erythrocyte_progenitor	minus
chr5	134913969	134915969	CXCL14	erythrocyte_progenitor	minus
chr5	135700164	135702164	TRPC7	erythrocyte_progenitor	minus
chr5	137474132	137476132	NME5	erythrocyte_progenitor	minus
chr5	141060800	141062800	ARAP3	erythrocyte_progenitor	minus
chr5	148441737	148443737	SH3TC2	erythrocyte_progenitor	minus
chr5	160364633	160366633	LOC285629	erythrocyte_progenitor	minus
chr5	169406744	169408744	FAM196B	erythrocyte_progenitor	minus
chr5	176898871	176901694	DBN1	erythrocyte_progenitor	minus
chr5	178016556	178018556	COL23A1	erythrocyte_progenitor	minus
chr5	178771431	178773431	ADAMTS2	erythrocyte_progenitor	minus
chr5	179049722	179051722	HNRNPH1	erythrocyte_progenitor	minus
chr6	3751246	3753246	PXDC1	erythrocyte_progenitor	minus
chr6	11043624	11045624	ELOVL2	erythrocyte_progenitor	minus
chr6	26249835	26251835	HIST1H3F	erythrocyte_progenitor	minus
chr6	26987085	26989085	LOC100270746	erythrocyte_progenitor	minus
chr6	28185707	28187707	TOB2P1	erythrocyte_progenitor	minus
chr6	30127711	30129711	TRIM10	erythrocyte_progenitor	minus
chr6	31087252	31089252	CDSN	erythrocyte_progenitor	minus
chr6	31238913	31240913	HLA-C	erythrocyte_progenitor	minus
chr6	31697039	31699039	DDAH2	erythrocyte_progenitor	minus
chr6	32805547	32807547	TAP2	erythrocyte_progenitor	minus
chr6	36354568	36356577	ETV7	erythrocyte_progenitor	minus
chr6	41701798	41704997	TFEB	erythrocyte_progenitor	minus
chr6	44264458	44266458	TCTE1	erythrocyte_progenitor	minus
chr6	49603587	49605587	RHAG	erythrocyte_progenitor	minus
chr6	72129448	72131448	LINC00472	erythrocyte_progenitor	minus
chr6	109702762	109704762	CD164	erythrocyte_progenitor	minus
chr6	110735753	110737753	DDO	erythrocyte_progenitor	minus
chr6	117085886	117087886	FAM162B	erythrocyte_progenitor	minus
chr6	134437818	134439818	HMGA1P7	erythrocyte_progenitor	minus
chr6	143265338	143267338	HIVEP2	erythrocyte_progenitor	minus
chr6	143770841	143772841	ADAT2	erythrocyte_progenitor	minus
chr6	165722111	165724111	C6orf118	erythrocyte_progenitor	minus
chr7	765978	768313	PRKAR1B	erythrocyte_progenitor	minus
chr7	3082509	3084509	CARD11	erythrocyte_progenitor	minus
chr7	26577444	26579444	KIAA0087	erythrocyte_progenitor	minus
chr7	27182287	27184287	HOXA5	erythrocyte_progenitor	minus
chr7	29185153	29187153	CPVL	erythrocyte_progenitor	minus
chr7	44579914	44581914	NPC1L1	erythrocyte_progenitor	minus
chr7	53878624	53880624	FLJ45974	erythrocyte_progenitor	minus
chr7	56173187	56175187	CHCHD2	erythrocyte_progenitor	minus
chr7	79081890	79083890	MAGI2	erythrocyte_progenitor	minus
chr7	81398452	81400452	HGF	erythrocyte_progenitor	minus
chr7	83823217	83825217	SEMA3A	erythrocyte_progenitor	minus
chr7	95950459	95952459	SLC25A13	erythrocyte_progenitor	minus
chr7	99035462	99037462	PTCD1	erythrocyte_progenitor	minus
chr7	104653588	104655588	LOC100216545	erythrocyte_progenitor	minus
chr7	105161685	105163685	PUS7	erythrocyte_progenitor	minus
chr7	107301243	107303243	LOC286002	erythrocyte_progenitor	minus
chr7	129409332	129411332	MIR182	erythrocyte_progenitor	minus
chr7	142658503	142660503	KEL	erythrocyte_progenitor	minus
chr8	6601761	6603761	MIR4659B	erythrocyte_progenitor	minus
chr8	6692166	6694166	XKR5	erythrocyte_progenitor	minus
chr8	28346784	28348784	FBXO16	erythrocyte_progenitor	minus
chr8	30001200	30003200	MBOAT4	erythrocyte_progenitor	minus
chr8	30889317	30892231	PURG	erythrocyte_progenitor	minus
chr8	49832999	49834999	SNAI2	erythrocyte_progenitor	minus
chr8	52721005	52723005	PXDNL	erythrocyte_progenitor	minus
chr8	61192954	61194954	CA8	erythrocyte_progenitor	minus
chr8	61879307	61881307	LOC100130298	erythrocyte_progenitor	minus
chr8	66473901	66475901	LOC286186	erythrocyte_progenitor	minus
chr8	72986819	72988819	TRPA1	erythrocyte_progenitor	minus
chr8	94711661	94713661	LINC00535	erythrocyte_progenitor	minus
chr8	105478277	105480277	DPYS	erythrocyte_progenitor	minus
chr8	124407705	124409705	ATAD2	erythrocyte_progenitor	minus
chr8	125052023	125054023	FER1L6-AS1	erythrocyte_progenitor	minus
chr8	142516330	142518330	FLJ43860	erythrocyte_progenitor	minus
chr8	144659513	144661513	NAPRT1	erythrocyte_progenitor	minus
chr8	144814323	144816323	MIR4664	erythrocyte_progenitor	minus
chr8	144814914	144816914	FAM83H	erythrocyte_progenitor	minus
chr9	34611110	34613110	C9orf23	erythrocyte_progenitor	minus
chr9	35748225	35750225	GBA2	erythrocyte_progenitor	minus
chr9	42018584	42020584	KGFLP2	erythrocyte_progenitor	minus
chr9	69201204	69203204	FOXD4L6	erythrocyte_progenitor	minus
chr9	104248475	104250475	C9orf125	erythrocyte_progenitor	minus
chr9	115773472	115775472	ZNF883	erythrocyte_progenitor	minus
chr9	116036869	116038869	CDC26	erythrocyte_progenitor	minus
chr9	117879536	117881536	TNC	erythrocyte_progenitor	minus
chr9	126163882	126165882	MIR601	erythrocyte_progenitor	minus
chr9	131709012	131711012	DOLK	erythrocyte_progenitor	minus
chr9	137740215	137742215	MIR3689C	erythrocyte_progenitor	minus
chr9	137740528	137742528	MIR3689D1	erythrocyte_progenitor	minus
chr9	137741118	137743118	MIR3689B	erythrocyte_progenitor	minus
chr9	137741202	137743202	MIR3689D2	erythrocyte_progenitor	minus
chr9	137741487	137743487	MIR3689E	erythrocyte_progenitor	minus
chr9	137741490	137743490	MIR3689A	erythrocyte_progenitor	minus
chr9	137741653	137743653	MIR3689F	erythrocyte_progenitor	minus
chr9	139580911	139582911	AGPAT2	erythrocyte_progenitor	minus
chrX	25033065	25035065	ARX	erythrocyte_progenitor	minus
chrX	34674405	34676405	TMEM47	erythrocyte_progenitor	minus
chrX	38079177	38081177	SRPX	erythrocyte_progenitor	minus
chrX	48827251	48829251	KCND1	erythrocyte_progenitor	minus
chrX	55207944	55209944	MTRNR2L10	erythrocyte_progenitor	minus
chrX	72346919	72348919	NAP1L6	erythrocyte_progenitor	minus
chrX	83441943	83443943	RPS6KA6	erythrocyte_progenitor	minus
chrX	100871991	100873991	ARMCX6	erythrocyte_progenitor	minus
chrX	102318168	102320168	BEX1	erythrocyte_progenitor	minus
chrX	102530797	102532797	TCEAL5	erythrocyte_progenitor	minus
chrX	134155566	134157566	FAM127C	erythrocyte_progenitor	minus
chrX	153235819	153237819	HCFC1	erythrocyte_progenitor	minus
chrX	153978348	153980348	GAB3	erythrocyte_progenitor	minus
chr1	2516899	2519189	FAM213B	erythrocyte_progenitor	plus
chr1	12226060	12228060	TNFRSF1B	erythrocyte_progenitor	plus
chr1	16009827	16011827	PLEKHM2	erythrocyte_progenitor	plus
chr1	16971069	16973069	MST1P2	erythrocyte_progenitor	plus
chr1	23036331	23038331	EPHB2	erythrocyte_progenitor	plus
chr1	25597981	25599981	RHD	erythrocyte_progenitor	plus
chr1	27667483	27669483	SYTL1	erythrocyte_progenitor	plus
chr1	32082301	32084301	HCRTR1	erythrocyte_progenitor	plus
chr1	32673695	32675695	DCDC2B	erythrocyte_progenitor	plus
chr1	33351098	33353098	HPCA	erythrocyte_progenitor	plus
chr1	36548676	36550676	TEKT2	erythrocyte_progenitor	plus
chr1	38258774	38262160	MANEAL	erythrocyte_progenitor	plus
chr1	40712573	40714573	TMCO2	erythrocyte_progenitor	plus
chr1	43612594	43614594	FAM183A	erythrocyte_progenitor	plus
chr1	45476805	45478805	UROD	erythrocyte_progenitor	plus
chr1	46048660	46050660	NASP	erythrocyte_progenitor	plus
chr1	55012807	55014807	ACOT11	erythrocyte_progenitor	plus
chr1	55504149	55506149	PCSK9	erythrocyte_progenitor	plus
chr1	64013651	64015651	DLEU2L	erythrocyte_progenitor	plus
chr1	66998825	67000825	SGIP1	erythrocyte_progenitor	plus
chr1	71511189	71513189	ZRANB2-AS1	erythrocyte_progenitor	plus
chr1	78469636	78471636	DNAJB4	erythrocyte_progenitor	plus
chr1	86045444	86047444	CYR61	erythrocyte_progenitor	plus
chr1	89872238	89874238	GBP1P1	erythrocyte_progenitor	plus
chr1	99468832	99470832	LOC100129620	erythrocyte_progenitor	plus
chr1	109288285	109290285	STXBP3	erythrocyte_progenitor	plus
chr1	114521030	114523030	OLFML3	erythrocyte_progenitor	plus
chr1	145523990	145525990	ITGA10	erythrocyte_progenitor	plus
chr1	147399506	147401506	GPR89B	erythrocyte_progenitor	plus
chr1	150479487	150481487	ECM1	erythrocyte_progenitor	plus
chr1	151809945	151811945	LOC100132111	erythrocyte_progenitor	plus
chr1	153329330	153331330	S100A9	erythrocyte_progenitor	plus
chr1	154292592	154294592	AQP10	erythrocyte_progenitor	plus
chr1	155292728	155295218	RUSC1	erythrocyte_progenitor	plus
chr1	159172803	159176049	DARC	erythrocyte_progenitor	plus
chr1	160335861	160337861	NHLH1	erythrocyte_progenitor	plus
chr1	161227517	161229517	PCP4L1	erythrocyte_progenitor	plus
chr1	161283166	161285166	SDHC	erythrocyte_progenitor	plus
chr1	161675762	161677762	FCRLA	erythrocyte_progenitor	plus
chr1	161735034	161737034	ATF6	erythrocyte_progenitor	plus
chr1	168249278	168251278	TBX19	erythrocyte_progenitor	plus
chr1	174416212	174418212	GPR52	erythrocyte_progenitor	plus
chr1	203273664	203275664	BTG2	erythrocyte_progenitor	plus
chr1	212525160	212527160	SNORA16B	erythrocyte_progenitor	plus
chr1	221051743	221053743	HLX	erythrocyte_progenitor	plus
chr1	225116356	225118363	DNAH14	erythrocyte_progenitor	plus
chr1	236848770	236850770	ACTN2	erythrocyte_progenitor	plus
chr1	248019501	248021501	TRIM58	erythrocyte_progenitor	plus
chr1	248549910	248551910	OR2T6	erythrocyte_progenitor	plus
chr10	11783356	11785356	ECHDC3	erythrocyte_progenitor	plus
chr10	12170640	12172640	SEC61A2	erythrocyte_progenitor	plus
chr10	17269258	17271258	VIM	erythrocyte_progenitor	plus
chr10	20839899	20841899	MIR4675	erythrocyte_progenitor	plus
chr10	26504236	26506236	GAD2	erythrocyte_progenitor	plus
chr10	71560644	71562644	COL13A1	erythrocyte_progenitor	plus
chr10	72971292	72973292	UNC5B	erythrocyte_progenitor	plus
chr10	73078010	73080010	SLC29A3	erythrocyte_progenitor	plus
chr10	74869210	74871210	NUDT13	erythrocyte_progenitor	plus
chr10	75503131	75505131	SEC24C	erythrocyte_progenitor	plus
chr10	81369695	81371695	SFTPA1	erythrocyte_progenitor	plus
chr10	81584658	81586658	LOC642361	erythrocyte_progenitor	plus
chr10	89101168	89103168	LOC439994	erythrocyte_progenitor	plus
chr10	102105772	102107772	SCD	erythrocyte_progenitor	plus
chr10	103577825	103579825	LOC100289509	erythrocyte_progenitor	plus
chr10	115613391	115615391	NHLRC2	erythrocyte_progenitor	plus
chr10	115802806	115804806	ADRB1	erythrocyte_progenitor	plus
chr10	118608023	118610023	ENO4	erythrocyte_progenitor	plus
chr10	129534538	129536538	FOXI2	erythrocyte_progenitor	plus
chr11	3646714	3648714	TRPC2	erythrocyte_progenitor	plus
chr11	6946654	6948654	ZNF215	erythrocyte_progenitor	plus
chr11	17756495	17758495	KCNC1	erythrocyte_progenitor	plus
chr11	20619946	20621946	SLC6A5	erythrocyte_progenitor	plus
chr11	22358667	22360667	SLC17A6	erythrocyte_progenitor	plus
chr11	33562877	33564877	C11orf41	erythrocyte_progenitor	plus
chr11	36615093	36617093	C11orf74	erythrocyte_progenitor	plus
chr11	45906047	45908047	MAPK8IP1	erythrocyte_progenitor	plus
chr11	46401618	46404303	MDK	erythrocyte_progenitor	plus
chr11	56466864	56468864	OR9G9	erythrocyte_progenitor	plus
chr11	56466864	56468864	OR9G1	erythrocyte_progenitor	plus
chr11	59823101	59825101	MS4A3	erythrocyte_progenitor	plus
chr11	61158832	61160865	TMEM216	erythrocyte_progenitor	plus
chr11	63272524	63276459	LGALS12	erythrocyte_progenitor	plus
chr11	64936707	64938707	SPDYC	erythrocyte_progenitor	plus
chr11	65626872	65628872	MUS81	erythrocyte_progenitor	plus
chr11	66044696	66046696	CNIH2	erythrocyte_progenitor	plus
chr11	67032905	67034905	ADRBK1	erythrocyte_progenitor	plus
chr11	67055762	67057816	ANKRD13D	erythrocyte_progenitor	plus
chr11	67069919	67071919	SSH3	erythrocyte_progenitor	plus
chr11	67158423	67161776	RAD9A	erythrocyte_progenitor	plus
chr11	67775048	67778790	ALDH3B1	erythrocyte_progenitor	plus
chr11	73660364	73662364	DNAJB13	erythrocyte_progenitor	plus
chr11	77299680	77301680	AQP11	erythrocyte_progenitor	plus
chr11	93062883	93064883	CCDC67	erythrocyte_progenitor	plus
chr11	94500508	94502508	AMOTL1	erythrocyte_progenitor	plus
chr11	96073602	96075602	MIR1260B	erythrocyte_progenitor	plus
chr11	120194838	120196838	TMEM136	erythrocyte_progenitor	plus
chr11	124119423	124121423	OR8G1	erythrocyte_progenitor	plus
chr11	134093561	134095561	VPS26B	erythrocyte_progenitor	plus
chr12	8324150	8326150	ZNF705A	erythrocyte_progenitor	plus
chr12	22198159	22200159	CMAS	erythrocyte_progenitor	plus
chr12	47609052	47611052	FAM113B	erythrocyte_progenitor	plus
chr12	50496801	50498801	GPD1	erythrocyte_progenitor	plus
chr12	51235701	51237701	TMPRSS12	erythrocyte_progenitor	plus
chr12	51317534	51319534	METTL7A	erythrocyte_progenitor	plus
chr12	54890495	54893568	NCKAP1L	erythrocyte_progenitor	plus
chr12	55412729	55414729	NEUROD4	erythrocyte_progenitor	plus
chr12	56413689	56415689	IKZF4	erythrocyte_progenitor	plus
chr12	56551045	56553045	MYL6	erythrocyte_progenitor	plus
chr12	56914609	56916609	RBMS2	erythrocyte_progenitor	plus
chr12	57156108	57158108	HSD17B6	erythrocyte_progenitor	plus
chr12	86267073	86269073	NTS	erythrocyte_progenitor	plus
chr12	102090417	102092417	CHPT1	erythrocyte_progenitor	plus
chr12	106750436	106752860	POLR3B	erythrocyte_progenitor	plus
chr12	109489380	109491380	USP30	erythrocyte_progenitor	plus
chr12	113228549	113230549	RPH3A	erythrocyte_progenitor	plus
chr12	113859216	113861216	SDSL	erythrocyte_progenitor	plus
chr12	120030264	120032264	TMEM233	erythrocyte_progenitor	plus
chr12	120426648	120428648	CCDC64	erythrocyte_progenitor	plus
chr13	37247049	37249049	SERTM1	erythrocyte_progenitor	plus
chr13	48806274	48808274	ITM2B	erythrocyte_progenitor	plus
chr13	88323870	88325870	SLITRK5	erythrocyte_progenitor	plus
chr14	21509385	21511385	RNASE7	erythrocyte_progenitor	plus
chr14	37640231	37642231	LOC100129794	erythrocyte_progenitor	plus
chr14	37666118	37668118	MIPOL1	erythrocyte_progenitor	plus
chr14	50158823	50160823	KLHDC1	erythrocyte_progenitor	plus
chr14	74224450	74226450	MIR4505	erythrocyte_progenitor	plus
chr14	74317534	74319621	PTGR2	erythrocyte_progenitor	plus
chr14	77647102	77649102	TMEM63C	erythrocyte_progenitor	plus
chr14	90041560	90043560	PRO1768	erythrocyte_progenitor	plus
chr14	91579357	91581979	C14orf159	erythrocyte_progenitor	plus
chr14	94576079	94578079	IFI27	erythrocyte_progenitor	plus
chr14	101511257	101513257	MIR381	erythrocyte_progenitor	plus
chr14	101511792	101513792	MIR487B	erythrocyte_progenitor	plus
chr14	101512658	101514658	MIR539	erythrocyte_progenitor	plus
chr14	101513238	101515238	MIR889	erythrocyte_progenitor	plus
chr14	101514887	101516887	MIR655	erythrocyte_progenitor	plus
chr14	101519643	101521643	MIR382	erythrocyte_progenitor	plus
chr14	101520024	101522024	MIR134	erythrocyte_progenitor	plus
chr14	101520595	101522595	MIR668	erythrocyte_progenitor	plus
chr14	101520756	101522756	MIR485	erythrocyte_progenitor	plus
chr14	101521556	101523556	MIR323B	erythrocyte_progenitor	plus
chr14	102429865	102431865	DYNC1H1	erythrocyte_progenitor	plus
chr14	104582742	104584742	MIR203	erythrocyte_progenitor	plus
chr14	105940131	105942131	CRIP2	erythrocyte_progenitor	plus
chr15	42840011	42842011	HAUS2	erythrocyte_progenitor	plus
chr15	48482867	48484867	CTXN2	erythrocyte_progenitor	plus
chr15	64442916	64444916	SNX22	erythrocyte_progenitor	plus
chr15	75073425	75075425	CSK	erythrocyte_progenitor	plus
chr15	75117951	75119951	CPLX3	erythrocyte_progenitor	plus
chr15	75493221	75495221	C15orf39	erythrocyte_progenitor	plus
chr15	75574182	75576182	GOLGA6D	erythrocyte_progenitor	plus
chr15	78555487	78559560	DNAJA4	erythrocyte_progenitor	plus
chr15	79574146	79576146	ANKRD34C	erythrocyte_progenitor	plus
chr15	81425644	81427644	C15orf26	erythrocyte_progenitor	plus
chr16	616032	618032	NHLRC4	erythrocyte_progenitor	plus
chr16	618968	621004	PIGQ	erythrocyte_progenitor	plus
chr16	729115	731115	STUB1	erythrocyte_progenitor	plus
chr16	15488611	15490611	MPV17L	erythrocyte_progenitor	plus
chr16	16410466	16412466	PKD1P1	erythrocyte_progenitor	plus
chr16	18994256	18996609	TMC7	erythrocyte_progenitor	plus
chr16	22018456	22020456	C16orf52	erythrocyte_progenitor	plus
chr16	23689201	23691201	PLK1	erythrocyte_progenitor	plus
chr16	25227285	25229285	AQP8	erythrocyte_progenitor	plus
chr16	29673300	29675580	SPN	erythrocyte_progenitor	plus
chr16	30193731	30195731	CORO1A	erythrocyte_progenitor	plus
chr16	30959405	30961405	ORAI3	erythrocyte_progenitor	plus
chr16	31482476	31485526	TGFB1I1	erythrocyte_progenitor	plus
chr16	31538203	31540203	AHSP	erythrocyte_progenitor	plus
chr16	47494210	47496210	PHKB	erythrocyte_progenitor	plus
chr16	56690855	56692855	MT1F	erythrocyte_progenitor	plus
chr16	56702726	56704726	MT1H	erythrocyte_progenitor	plus
chr16	56708649	56710649	MT1IP	erythrocyte_progenitor	plus
chr16	58009339	58011339	TEPP	erythrocyte_progenitor	plus
chr16	66585466	66587466	CKLF-CMTM1	erythrocyte_progenitor	plus
chr16	66585466	66587466	CKLF	erythrocyte_progenitor	plus
chr16	67232028	67234028	ELMO3	erythrocyte_progenitor	plus
chr16	69165499	69167499	CIRH1A	erythrocyte_progenitor	plus
chr16	70562402	70564402	SNORD111B	erythrocyte_progenitor	plus
chr16	84327401	84329401	WFDC1	erythrocyte_progenitor	plus
chr16	84681131	84683131	KLHL36	erythrocyte_progenitor	plus
chr16	85644029	85647924	KIAA0182	erythrocyte_progenitor	plus
chr17	9547950	9549950	USP43	erythrocyte_progenitor	plus
chr17	15689164	15691164	MEIS3P1	erythrocyte_progenitor	plus
chr17	15847231	15849231	ADORA2B	erythrocyte_progenitor	plus
chr17	16689206	16691206	USP32P1	erythrocyte_progenitor	plus
chr17	16691057	16693057	FAM106CP	erythrocyte_progenitor	plus
chr17	17583787	17585787	RAI1	erythrocyte_progenitor	plus
chr17	18624402	18626402	TRIM16L	erythrocyte_progenitor	plus
chr17	25620106	25622106	WSB1	erythrocyte_progenitor	plus
chr17	27054832	27056832	NEK8	erythrocyte_progenitor	plus
chr17	27368918	27370918	PIPOX	erythrocyte_progenitor	plus
chr17	27894739	27896739	TP53I13	erythrocyte_progenitor	plus
chr17	29860901	29862901	MIR4724	erythrocyte_progenitor	plus
chr17	40995609	40997609	AOC2	erythrocyte_progenitor	plus
chr17	41993576	41995576	FAM215A	erythrocyte_progenitor	plus
chr17	42976154	42978154	CCDC103	erythrocyte_progenitor	plus
chr17	43338558	43340558	LOC100133991	erythrocyte_progenitor	plus
chr17	47652298	47654298	NXPH3	erythrocyte_progenitor	plus
chr17	55054468	55056468	SCPEP1	erythrocyte_progenitor	plus
chr17	57442444	57444444	MIR4729	erythrocyte_progenitor	plus
chr17	76141434	76143434	C17orf99	erythrocyte_progenitor	plus
chr17	78009431	78011431	CCDC40	erythrocyte_progenitor	plus
chr18	108065	110065	ROCK1P1	erythrocyte_progenitor	plus
chr18	12307257	12309257	TUBB6	erythrocyte_progenitor	plus
chr19	1382883	1384883	NDUFS7	erythrocyte_progenitor	plus
chr19	4228540	4230540	EBI3	erythrocyte_progenitor	plus
chr19	4678294	4680294	LOC100131094	erythrocyte_progenitor	plus
chr19	10215899	10217899	PPAN-P2RY11	erythrocyte_progenitor	plus
chr19	10215899	10217899	PPAN	erythrocyte_progenitor	plus
chr19	10217327	10219327	SNORD105	erythrocyte_progenitor	plus
chr19	10661798	10663798	MIR1238	erythrocyte_progenitor	plus
chr19	12901310	12903310	JUNB	erythrocyte_progenitor	plus
chr19	13105584	13107584	NFIX	erythrocyte_progenitor	plus
chr19	13260282	13262282	IER2	erythrocyte_progenitor	plus
chr19	14182821	14184821	LOC113230	erythrocyte_progenitor	plus
chr19	15750707	15752707	CYP4F3	erythrocyte_progenitor	plus
chr19	15782828	15784828	CYP4F12	erythrocyte_progenitor	plus
chr19	15938757	15940757	UCA1	erythrocyte_progenitor	plus
chr19	36235494	36237494	PSENEN	erythrocyte_progenitor	plus
chr19	41698115	41700115	CYP2S1	erythrocyte_progenitor	plus
chr19	41724108	41726108	AXL	erythrocyte_progenitor	plus
chr19	42816477	42818477	TMEM145	erythrocyte_progenitor	plus
chr19	44616548	44618548	ZNF225	erythrocyte_progenitor	plus
chr19	45970253	45972253	FOSB	erythrocyte_progenitor	plus
chr19	48452553	48454553	SNAR-C3	erythrocyte_progenitor	plus
chr19	48948030	48950030	GRWD1	erythrocyte_progenitor	plus
chr19	49660016	49662016	TRPM4	erythrocyte_progenitor	plus
chr19	51319937	51321937	MGC45922	erythrocyte_progenitor	plus
chr19	56988243	56990493	LOC100128252	erythrocyte_progenitor	plus
chr19	58789318	58791318	ZNF8	erythrocyte_progenitor	plus
chr2	10442040	10444826	HPCAL1	erythrocyte_progenitor	plus
chr2	12876493	12878493	MIR3125	erythrocyte_progenitor	plus
chr2	26623784	26625784	CCDC164	erythrocyte_progenitor	plus
chr2	26914581	26916581	KCNK3	erythrocyte_progenitor	plus
chr2	27664233	27666233	KRTCAP3	erythrocyte_progenitor	plus
chr2	27718706	27720706	GCKR	erythrocyte_progenitor	plus
chr2	44588043	44590043	CAMKMT	erythrocyte_progenitor	plus
chr2	64680327	64682327	LGALSL	erythrocyte_progenitor	plus
chr2	74755532	74757532	HTRA2	erythrocyte_progenitor	plus
chr2	96067448	96069448	FAHD2A	erythrocyte_progenitor	plus
chr2	112655191	112657191	MERTK	erythrocyte_progenitor	plus
chr2	114255661	114257661	FOXD4L1	erythrocyte_progenitor	plus
chr2	120188446	120190446	TMEM37	erythrocyte_progenitor	plus
chr2	124781864	124783864	CNTNAP5	erythrocyte_progenitor	plus
chr2	131512077	131514864	FAM123C	erythrocyte_progenitor	plus
chr2	138720808	138722808	HNMT	erythrocyte_progenitor	plus
chr2	169438453	169440453	MIR4774	erythrocyte_progenitor	plus
chr2	172377866	172379866	CYBRD1	erythrocyte_progenitor	plus
chr2	203498901	203500901	FAM117B	erythrocyte_progenitor	plus
chr2	207506142	207508142	LOC200726	erythrocyte_progenitor	plus
chr2	210635717	210637717	UNC80	erythrocyte_progenitor	plus
chr2	215275461	215277461	VWC2L	erythrocyte_progenitor	plus
chr2	218989013	218991736	CXCR2	erythrocyte_progenitor	plus
chr2	220377892	220379892	ACCN4	erythrocyte_progenitor	plus
chr2	231576557	231579263	CAB39	erythrocyte_progenitor	plus
chr2	236401733	236403733	AGAP1	erythrocyte_progenitor	plus
chr2	241630262	241632262	AQP12A	erythrocyte_progenitor	plus
chr20	206899	208899	DEFB129	erythrocyte_progenitor	plus
chr20	1245960	1247960	SNPH	erythrocyte_progenitor	plus
chr20	2794633	2796657	C20orf141	erythrocyte_progenitor	plus
chr20	2795976	2797976	TMEM239	erythrocyte_progenitor	plus
chr20	4172737	4174737	LOC728228	erythrocyte_progenitor	plus
chr20	19192290	19194290	SLC24A3	erythrocyte_progenitor	plus
chr20	30072581	30074581	LINC00028	erythrocyte_progenitor	plus
chr20	33813539	33815539	MMP24	erythrocyte_progenitor	plus
chr20	43035760	43037760	MIR3646	erythrocyte_progenitor	plus
chr20	43342885	43344885	WISP2	erythrocyte_progenitor	plus
chr20	44257385	44259385	WFDC10A	erythrocyte_progenitor	plus
chr20	44461470	44463470	SNX21	erythrocyte_progenitor	plus
chr20	44745906	44747906	CD40	erythrocyte_progenitor	plus
chr20	48806120	48808120	CEBPB	erythrocyte_progenitor	plus
chr20	54822788	54824788	MC3R	erythrocyte_progenitor	plus
chr20	55965454	55967454	RBM38	erythrocyte_progenitor	plus
chr20	56135137	56137137	PCK1	erythrocyte_progenitor	plus
chr20	58712548	58714548	LOC284757	erythrocyte_progenitor	plus
chr20	59052169	59054169	MIR4533	erythrocyte_progenitor	plus
chr21	33783752	33785752	C21orf63	erythrocyte_progenitor	plus
chr21	37691487	37693487	MORC3	erythrocyte_progenitor	plus
chr21	46493493	46495493	ADARB1	erythrocyte_progenitor	plus
chr22	19710066	19712066	GP1BB	erythrocyte_progenitor	plus
chr22	21368442	21370464	P2RX6	erythrocyte_progenitor	plus
chr22	23164270	23166270	MIR650	erythrocyte_progenitor	plus
chr22	25027882	25029882	BCRP3	erythrocyte_progenitor	plus
chr22	31089793	31091793	OSBP2	erythrocyte_progenitor	plus
chr22	33195802	33197802	TIMP3	erythrocyte_progenitor	plus
chr22	39352527	39354527	APOBEC3A	erythrocyte_progenitor	plus
chr22	39492229	39494229	APOBEC3H	erythrocyte_progenitor	plus
chr22	42295948	42297948	MIR33A	erythrocyte_progenitor	plus
chr22	43505754	43507754	BIK	erythrocyte_progenitor	plus
chr22	43546520	43548941	TSPO	erythrocyte_progenitor	plus
chr22	46448726	46450726	LOC150381	erythrocyte_progenitor	plus
chr3	9957758	9959782	IL17RC	erythrocyte_progenitor	plus
chr3	24534578	24536578	LOC644990	erythrocyte_progenitor	plus
chr3	29321803	29323803	RBMS3	erythrocyte_progenitor	plus
chr3	33317934	33319937	FBXL2	erythrocyte_progenitor	plus
chr3	36421097	36423097	STAC	erythrocyte_progenitor	plus
chr3	37492813	37494813	ITGA9	erythrocyte_progenitor	plus
chr3	38178969	38180969	MYD88	erythrocyte_progenitor	plus
chr3	49208018	49210018	KLHDC8B	erythrocyte_progenitor	plus
chr3	50605909	50607909	HEMK1	erythrocyte_progenitor	plus
chr3	51740081	51742081	GRM2	erythrocyte_progenitor	plus
chr3	100052562	100054562	NIT2	erythrocyte_progenitor	plus
chr3	127347039	127349039	PODXL2	erythrocyte_progenitor	plus
chr3	129799674	129801674	ALG1L2	erythrocyte_progenitor	plus
chr3	135968167	135970167	PCCB	erythrocyte_progenitor	plus
chr3	136536861	136538861	TMEM22	erythrocyte_progenitor	plus
chr3	137905148	137907148	ARMC8	erythrocyte_progenitor	plus
chr3	148582043	148584043	CPA3	erythrocyte_progenitor	plus
chr3	151487244	151489244	LOC201651	erythrocyte_progenitor	plus
chr3	167966310	167968310	EGFEM1P	erythrocyte_progenitor	plus
chr3	185676758	185678758	LOC344887	erythrocyte_progenitor	plus
chr3	191045874	191047874	CCDC50	erythrocyte_progenitor	plus
chr3	192957918	192959918	HRASLS	erythrocyte_progenitor	plus
chr3	192958568	192960568	MGC2889	erythrocyte_progenitor	plus
chr4	2060239	2062239	NAT8L	erythrocyte_progenitor	plus
chr4	2844584	2846584	ADD1	erythrocyte_progenitor	plus
chr4	4860392	4862392	MSX1	erythrocyte_progenitor	plus
chr4	8580964	8583217	GPR78	erythrocyte_progenitor	plus
chr4	39459665	39461665	LIAS	erythrocyte_progenitor	plus
chr4	41257898	41259898	UCHL1	erythrocyte_progenitor	plus
chr4	48484360	48486360	SLC10A4	erythrocyte_progenitor	plus
chr4	55523095	55525095	KIT	erythrocyte_progenitor	plus
chr4	71767057	71769057	MOB1B	erythrocyte_progenitor	plus
chr4	77171853	77173853	FAM47E-STBD1	erythrocyte_progenitor	plus
chr4	77171853	77173853	FAM47E	erythrocyte_progenitor	plus
chr4	77355253	77357253	SHROOM3	erythrocyte_progenitor	plus
chr4	78077357	78079357	CCNG2	erythrocyte_progenitor	plus
chr4	79891902	79893902	LOC100505875	erythrocyte_progenitor	plus
chr4	90756552	90758552	LOC644248	erythrocyte_progenitor	plus
chr4	108851717	108853717	CYP2U1	erythrocyte_progenitor	plus
chr4	109570741	109572741	OSTC	erythrocyte_progenitor	plus
chr4	118954500	118956500	NDST3	erythrocyte_progenitor	plus
chr4	140585922	140587922	MGST2	erythrocyte_progenitor	plus
chr4	144479625	144481625	GUSBP5	erythrocyte_progenitor	plus
chr4	158140736	158142820	GRIA2	erythrocyte_progenitor	plus
chr4	172733575	172735575	GALNTL6	erythrocyte_progenitor	plus
chr5	23506724	23508724	PRDM9	erythrocyte_progenitor	plus
chr5	44808027	44810027	MRPS30	erythrocyte_progenitor	plus
chr5	52855465	52857465	NDUFS4	erythrocyte_progenitor	plus
chr5	63985135	63987135	FAM159B	erythrocyte_progenitor	plus
chr5	68709939	68711939	MARVELD2	erythrocyte_progenitor	plus
chr5	76247680	76249680	CRHBP	erythrocyte_progenitor	plus
chr5	76381623	76383623	LOC728723	erythrocyte_progenitor	plus
chr5	90675164	90677164	LOC100129716	erythrocyte_progenitor	plus
chr5	92918043	92920043	NR2F1	erythrocyte_progenitor	plus
chr5	95065850	95067850	RHOBTB3	erythrocyte_progenitor	plus
chr5	110426870	110428870	WDR36	erythrocyte_progenitor	plus
chr5	121464215	121466215	ZNF474	erythrocyte_progenitor	plus
chr5	128300210	128302213	SLC27A6	erythrocyte_progenitor	plus
chr5	129239523	129241523	CHSY3	erythrocyte_progenitor	plus
chr5	133449402	133452350	TCF7	erythrocyte_progenitor	plus
chr5	135169365	135171365	SLC25A48	erythrocyte_progenitor	plus
chr5	138088107	138090107	CTNNA1	erythrocyte_progenitor	plus
chr5	140479234	140481234	PCDHB3	erythrocyte_progenitor	plus
chr5	140717354	140719354	PCDHGA2	erythrocyte_progenitor	plus
chr5	140766452	140768452	PCDHGB4	erythrocyte_progenitor	plus
chr5	140786770	140788770	PCDHGB6	erythrocyte_progenitor	plus
chr5	140791743	140793743	PCDHGA10	erythrocyte_progenitor	plus
chr5	140796214	140798260	PCDHGB7	erythrocyte_progenitor	plus
chr5	140809158	140811158	PCDHGA12	erythrocyte_progenitor	plus
chr5	141487324	141489324	NDFIP1	erythrocyte_progenitor	plus
chr5	143190726	143192726	HMHB1	erythrocyte_progenitor	plus
chr5	146938557	146940557	LOC153469	erythrocyte_progenitor	plus
chr5	148520054	148522054	ABLIM3	erythrocyte_progenitor	plus
chr5	153569295	153571295	GALNT10	erythrocyte_progenitor	plus
chr5	167955582	167957582	FBLL1	erythrocyte_progenitor	plus
chr5	169531917	169533917	FOXI1	erythrocyte_progenitor	plus
chr5	170287896	170289896	RANBP17	erythrocyte_progenitor	plus
chr5	172067276	172069276	NEURL1B	erythrocyte_progenitor	plus
chr6	2764666	2766666	WRNIP1	erythrocyte_progenitor	plus
chr6	2999067	3001067	NQO2	erythrocyte_progenitor	plus
chr6	7106830	7109086	RREB1	erythrocyte_progenitor	plus
chr6	11042991	11045924	LOC100506409	erythrocyte_progenitor	plus
chr6	17280809	17283932	RBM24	erythrocyte_progenitor	plus
chr6	25651429	25653429	SCGN	erythrocyte_progenitor	plus
chr6	26250879	26252879	HIST1H2BH	erythrocyte_progenitor	plus
chr6	26420619	26422619	BTN2A3P	erythrocyte_progenitor	plus
chr6	27660814	27662858	LOC100507173	erythrocyte_progenitor	plus
chr6	31020984	31022984	HCG22	erythrocyte_progenitor	plus
chr6	31081608	31083608	PSORS1C1	erythrocyte_progenitor	plus
chr6	41009237	41011457	TSPO2	erythrocyte_progenitor	plus
chr6	41195062	41197062	TREML4	erythrocyte_progenitor	plus
chr6	56818773	56820773	BEND6	erythrocyte_progenitor	plus
chr6	56910384	56912384	KIAA1586	erythrocyte_progenitor	plus
chr6	80340000	80342000	SH3BGRL2	erythrocyte_progenitor	plus
chr6	90603188	90605188	GJA10	erythrocyte_progenitor	plus
chr6	110299298	110301298	GPR6	erythrocyte_progenitor	plus
chr6	124124069	124126069	NKAIN2	erythrocyte_progenitor	plus
chr6	125473879	125476420	TPD52L1	erythrocyte_progenitor	plus
chr6	134272308	134275301	TBPL1	erythrocyte_progenitor	plus
chr6	143770918	143772918	PEX3	erythrocyte_progenitor	plus
chr6	146347782	146349782	GRM1	erythrocyte_progenitor	plus
chr6	153018030	153020030	MYCT1	erythrocyte_progenitor	plus
chr7	765338	767338	HEATR2	erythrocyte_progenitor	plus
chr7	5110691	5112691	LOC389458	erythrocyte_progenitor	plus
chr7	8472585	8474585	NXPH1	erythrocyte_progenitor	plus
chr7	22765766	22767766	IL6	erythrocyte_progenitor	plus
chr7	32996005	32998005	FKBP9	erythrocyte_progenitor	plus
chr7	37959163	37961921	EPDR1	erythrocyte_progenitor	plus
chr7	43797272	43799272	BLVRA	erythrocyte_progenitor	plus
chr7	48210057	48212057	ABCA13	erythrocyte_progenitor	plus
chr7	63504821	63506821	ZNF727	erythrocyte_progenitor	plus
chr7	73702805	73704805	CLIP2	erythrocyte_progenitor	plus
chr7	79081273	79084276	MAGI2-AS3	erythrocyte_progenitor	plus
chr7	89840000	89844134	STEAP2	erythrocyte_progenitor	plus
chr7	90337712	90339712	CDK14	erythrocyte_progenitor	plus
chr7	93550016	93552016	GNG11	erythrocyte_progenitor	plus
chr7	94022873	94024873	COL1A2	erythrocyte_progenitor	plus
chr7	98971298	98973298	ARPC1B	erythrocyte_progenitor	plus
chr7	99035563	99037563	CPSF4	erythrocyte_progenitor	plus
chr7	99069515	99071515	ZNF789	erythrocyte_progenitor	plus
chr7	99970068	99972068	PILRA	erythrocyte_progenitor	plus
chr7	104653637	104655637	MLL5	erythrocyte_progenitor	plus
chr7	107300080	107302080	SLC26A4	erythrocyte_progenitor	plus
chr7	110730062	110732062	LRRN3	erythrocyte_progenitor	plus
chr7	116311459	116313459	MET	erythrocyte_progenitor	plus
chr7	127846925	127848925	MIR129-1	erythrocyte_progenitor	plus
chr7	136552399	136554993	CHRM2	erythrocyte_progenitor	plus
chr7	142373131	142375131	MTRNR2L6	erythrocyte_progenitor	plus
chr7	142551792	142553792	EPHB6	erythrocyte_progenitor	plus
chr7	145812453	145814453	CNTNAP2	erythrocyte_progenitor	plus
chr8	6601685	6603685	MIR4659A	erythrocyte_progenitor	plus
chr8	6692076	6694076	LOC100652791	erythrocyte_progenitor	plus
chr8	23385363	23387363	SLC25A37	erythrocyte_progenitor	plus
chr8	26148007	26151732	PPP2R2A	erythrocyte_progenitor	plus
chr8	30889778	30891778	WRN	erythrocyte_progenitor	plus
chr8	38964050	38966050	ADAM32	erythrocyte_progenitor	plus
chr8	50823597	50825597	SNTG1	erythrocyte_progenitor	plus
chr8	74902564	74904564	LY96	erythrocyte_progenitor	plus
chr8	82643688	82645688	CHMP4C	erythrocyte_progenitor	plus
chr8	92260516	92262516	SLC26A7	erythrocyte_progenitor	plus
chr8	94711773	94713773	FAM92A1	erythrocyte_progenitor	plus
chr8	97656499	97658499	CPQ	erythrocyte_progenitor	plus
chr8	98786809	98788809	LAPTM4B	erythrocyte_progenitor	plus
chr8	105351054	105353054	TM7SF4	erythrocyte_progenitor	plus
chr8	106330147	106332147	ZFPM2	erythrocyte_progenitor	plus
chr8	120427552	120429552	NOV	erythrocyte_progenitor	plus
chr8	121136352	121138352	COL14A1	erythrocyte_progenitor	plus
chr8	124193752	124195752	FAM83A	erythrocyte_progenitor	plus
chr8	128747315	128749315	MYC	erythrocyte_progenitor	plus
chr8	128971879	128973879	MIR1205	erythrocyte_progenitor	plus
chr8	135609314	135611314	ZFAT-AS1	erythrocyte_progenitor	plus
chr8	136468716	136470716	KHDRBS3	erythrocyte_progenitor	plus
chr8	144815310	144817310	LOC100128338	erythrocyte_progenitor	plus
chr8	145063226	145065226	GRINA	erythrocyte_progenitor	plus
chr8	145721109	145723109	PPP1R16A	erythrocyte_progenitor	plus
chr9	14992325	14994325	LOC389705	erythrocyte_progenitor	plus
chr9	22445840	22447840	DMRTA1	erythrocyte_progenitor	plus
chr9	33239196	33241196	SPINK4	erythrocyte_progenitor	plus
chr9	34651182	34654932	IL11RA	erythrocyte_progenitor	plus
chr9	35748277	35750277	RGP1	erythrocyte_progenitor	plus
chr9	35859271	35861271	FP588	erythrocyte_progenitor	plus
chr9	70916783	70918783	FOXD4L3	erythrocyte_progenitor	plus
chr9	86237033	86239033	C9orf103	erythrocyte_progenitor	plus
chr9	103234520	103236520	TMEFF1	erythrocyte_progenitor	plus
chr9	116036914	116038914	PRPF4	erythrocyte_progenitor	plus
chr9	125795846	125797846	GPR21	erythrocyte_progenitor	plus
chr9	127419715	127421715	MIR181A2HG	erythrocyte_progenitor	plus
chr9	130910732	130912732	LCN2	erythrocyte_progenitor	plus
chr9	131682174	131685562	PHYHD1	erythrocyte_progenitor	plus
chr9	131708977	131710977	NUP188	erythrocyte_progenitor	plus
chr9	133970863	133972863	AIF1L	erythrocyte_progenitor	plus
chr9	135853098	135855098	GFI1B	erythrocyte_progenitor	plus
chr9	137532652	137534652	COL5A1	erythrocyte_progenitor	plus
chr9	140771241	140773241	CACNA1B	erythrocyte_progenitor	plus
chrX	30670476	30672476	GK	erythrocyte_progenitor	plus
chrX	35936851	35938851	CXorf22	erythrocyte_progenitor	plus
chrX	44702249	44704249	DUSP21	erythrocyte_progenitor	plus
chrX	46432192	46434192	CHST7	erythrocyte_progenitor	plus
chrX	54946249	54948249	TRO	erythrocyte_progenitor	plus
chrX	56257822	56259870	KLF8	erythrocyte_progenitor	plus
chrX	65381433	65385109	HEPH	erythrocyte_progenitor	plus
chrX	68047840	68049840	EFNB1	erythrocyte_progenitor	plus
chrX	84497997	84499997	ZNF711	erythrocyte_progenitor	plus
chrX	99898163	99900163	SRPX2	erythrocyte_progenitor	plus
chrX	100473933	100475933	DRP2	erythrocyte_progenitor	plus
chrX	152759347	152761347	BGN	erythrocyte_progenitor	plus
chrX	152952752	152955966	SLC6A8	erythrocyte_progenitor	plus
chrX	153236991	153238991	TMEM187	erythrocyte_progenitor	plus
chrX	153685623	153687623	PLXNA3	erythrocyte_progenitor	plus
chrX	154443701	154445701	VBP1	erythrocyte_progenitor	plus
chr1	934552	936552	HES4	lymphocytes	minus
chr1	1148548	1150548	TNFRSF4	lymphocytes	minus
chr1	1534476	1536476	C1orf233	lymphocytes	minus
chr1	6478979	6480979	HES2	lymphocytes	minus
chr1	6525255	6527255	TNFRSF25	lymphocytes	minus
chr1	8002225	8004225	TNFRSF9	lymphocytes	minus
chr1	9713644	9715644	C1orf200	lymphocytes	minus
chr1	11119091	11121091	SRM	lymphocytes	minus
chr1	16399127	16401127	FAM131C	lymphocytes	minus
chr1	16562659	16564659	RSG1	lymphocytes	minus
chr1	16818196	16820196	CROCCP3	lymphocytes	minus
chr1	17764059	17767250	RCC2	lymphocytes	minus
chr1	20811728	20813728	CAMK2N1	lymphocytes	minus
chr1	21058133	21060133	SH2D5	lymphocytes	minus
chr1	22262750	22264750	HSPG2	lymphocytes	minus
chr1	24238817	24240817	CNR2	lymphocytes	minus
chr1	24305953	24307953	SRSF10	lymphocytes	minus
chr1	24512765	24514765	IL28RA	lymphocytes	minus
chr1	24827850	24829850	RCAN3AS	lymphocytes	minus
chr1	26184848	26186848	C1orf135	lymphocytes	minus
chr1	26323648	26325648	PAFAH2	lymphocytes	minus
chr1	26643756	26645756	UBXN11	lymphocytes	minus
chr1	27285901	27287901	C1orf172	lymphocytes	minus
chr1	32800834	32802834	MARCKSL1	lymphocytes	minus
chr1	33282633	33284633	YARS	lymphocytes	minus
chr1	33429286	33431286	RNF19B	lymphocytes	minus
chr1	36614067	36616067	TRAPPC3	lymphocytes	minus
chr1	36788755	36790755	FAM176B	lymphocytes	minus
chr1	40236020	40238020	OXCT2	lymphocytes	minus
chr1	40366687	40368687	MYCL1	lymphocytes	minus
chr1	45671250	45673250	ZSWIM5	lymphocytes	minus
chr1	46111357	46113357	RPS15AP10	lymphocytes	minus
chr1	47079805	47083563	MOB3C	lymphocytes	minus
chr1	52455436	52457436	RAB3B	lymphocytes	minus
chr1	53017762	53019762	ZCCHC11	lymphocytes	minus
chr1	54354487	54356487	YIPF1	lymphocytes	minus
chr1	55680039	55682039	USP24	lymphocytes	minus
chr1	59011446	59013446	OMA1	lymphocytes	minus
chr1	59611479	59613479	HSD52	lymphocytes	minus
chr1	71532399	71534399	MIR186	lymphocytes	minus
chr1	94146385	94148385	BCAR3	lymphocytes	minus
chr1	94702307	94704307	ARHGAP29	lymphocytes	minus
chr1	101359418	101361418	EXTL2	lymphocytes	minus
chr1	109655479	109657479	C1orf194	lymphocytes	minus
chr1	110051336	110053336	AMIGO1	lymphocytes	minus
chr1	110305644	110307644	EPS8L3	lymphocytes	minus
chr1	114300777	114302777	PHTF1	lymphocytes	minus
chr1	117112715	117114715	CD58	lymphocytes	minus
chr1	118471302	118473302	GDAP2	lymphocytes	minus
chr1	119682295	119684295	WARS2	lymphocytes	minus
chr1	145588435	145590435	NUDT17	lymphocytes	minus
chr1	149857232	149859232	HIST2H2BE	lymphocytes	minus
chr1	149858466	149860466	HIST2H2AB	lymphocytes	minus
chr1	150206026	150209504	ANP32E	lymphocytes	minus
chr1	150946479	150948479	CERS2	lymphocytes	minus
chr1	151812033	151814033	C2CD4D	lymphocytes	minus
chr1	151965714	151967714	S100A10	lymphocytes	minus
chr1	152008511	152010511	S100A11	lymphocytes	minus
chr1	153513241	153515241	S100A5	lymphocytes	minus
chr1	153930132	153932132	CRTC2	lymphocytes	minus
chr1	153957806	153959806	RAB13	lymphocytes	minus
chr1	154192273	154194273	C1orf43	lymphocytes	minus
chr1	155022641	155024641	LOC100505666	lymphocytes	minus
chr1	155035467	155037467	LOC100505666	lymphocytes	minus
chr1	156389221	156391221	MIR9-1	lymphocytes	minus
chr1	156674459	156676608	CRABP2	lymphocytes	minus
chr1	156696705	156698705	ISG20L2	lymphocytes	minus
chr1	158368256	158370256	OR10T2	lymphocytes	minus
chr1	159894284	159896284	TAGLN2	lymphocytes	minus
chr1	161014757	161016757	USF1	lymphocytes	minus
chr1	164742878	164744878	LOC100505795	lymphocytes	minus
chr1	166134958	166136958	FAM78B	lymphocytes	minus
chr1	166943561	166945561	ILDR2	lymphocytes	minus
chr1	167486847	167488847	CD247	lymphocytes	minus
chr1	168390894	168392894	LOC100505918	lymphocytes	minus
chr1	168512235	168514235	XCL2	lymphocytes	minus
chr1	180991046	180993046	STX6	lymphocytes	minus
chr1	183621448	183623448	APOBEC4	lymphocytes	minus
chr1	200991828	200993828	KIF21B	lymphocytes	minus
chr1	202112871	202114871	ARL8A	lymphocytes	minus
chr1	202128119	202131716	PTPN7	lymphocytes	minus
chr1	203143942	203145942	MYBPH	lymphocytes	minus
chr1	204120307	204122307	ETNK2	lymphocytes	minus
chr1	207094235	207096378	FAIM3	lymphocytes	minus
chr1	209823679	209826820	LAMB3	lymphocytes	minus
chr1	211751099	211753099	SLC30A1	lymphocytes	minus
chr1	212003114	212005114	LPGAT1	lymphocytes	minus
chr1	212587243	212589267	TMEM206	lymphocytes	minus
chr1	212872327	212874327	BATF3	lymphocytes	minus
chr1	218518020	218520020	LOC728463	lymphocytes	minus
chr1	223315624	223317624	TLR5	lymphocytes	minus
chr1	223536544	223538544	SUSD4	lymphocytes	minus
chr1	228290022	228292022	C1orf35	lymphocytes	minus
chr1	229477688	229479688	C1orf96	lymphocytes	minus
chr1	233430459	233432459	PCNXL2	lymphocytes	minus
chr1	234613849	234615849	TARBP1	lymphocytes	minus
chr1	240774462	240776462	GREM2	lymphocytes	minus
chr1	247334318	247336318	ZNF124	lymphocytes	minus
chr1	247494045	247496045	ZNF496	lymphocytes	minus
chr10	2356268	2358268	LOC399708	lymphocytes	minus
chr10	11146451	11148451	LOC439950	lymphocytes	minus
chr10	13389298	13391298	SEPHS1	lymphocytes	minus
chr10	15412058	15414058	FAM171A1	lymphocytes	minus
chr10	17495254	17497254	ST8SIA6	lymphocytes	minus
chr10	21784570	21786570	MIR1915	lymphocytes	minus
chr10	21785213	21787213	C10orf114	lymphocytes	minus
chr10	25240533	25242533	PRTFDC1	lymphocytes	minus
chr10	30347488	30349488	KIAA1462	lymphocytes	minus
chr10	30662377	30664377	LOC729668	lymphocytes	minus
chr10	30917647	30919647	LYZL2	lymphocytes	minus
chr10	43047280	43049280	ZNF37BP	lymphocytes	minus
chr10	45495470	45497470	C10orf25	lymphocytes	minus
chr10	50322559	50324559	VSTM4	lymphocytes	minus
chr10	61468649	61470649	SLC16A9	lymphocytes	minus
chr10	70230730	70232730	DNA2	lymphocytes	minus
chr10	71332210	71334210	NEUROG3	lymphocytes	minus
chr10	71905496	71907496	TYSND1	lymphocytes	minus
chr10	72361531	72363531	PRF1	lymphocytes	minus
chr10	73847531	73849790	SPOCK2	lymphocytes	minus
chr10	75192319	75194319	MSS51	lymphocytes	minus
chr10	75570589	75572589	NDST2	lymphocytes	minus
chr10	75633349	75635349	CAMK2G	lymphocytes	minus
chr10	75681535	75683535	C10orf55	lymphocytes	minus
chr10	81204383	81206383	ZCCHC24	lymphocytes	minus
chr10	90610732	90612732	ANKRD22	lymphocytes	minus
chr10	90750147	90752147	ACTA2	lymphocytes	minus
chr10	90966071	90968071	CH25H	lymphocytes	minus
chr10	92616671	92618671	HTR7	lymphocytes	minus
chr10	93391858	93393858	PPP1R3C	lymphocytes	minus
chr10	97415567	97417567	ALDH18A1	lymphocytes	minus
chr10	97823156	97825156	MIR3157	lymphocytes	minus
chr10	98272683	98274683	TLL2	lymphocytes	minus
chr10	98479279	98481279	PIK3AP1	lymphocytes	minus
chr10	99093458	99095458	FRAT2	lymphocytes	minus
chr10	99257366	99259366	MMS19	lymphocytes	minus
chr10	101768676	101770676	DNMBP	lymphocytes	minus
chr10	101988344	101990344	CHUK	lymphocytes	minus
chr10	102889903	102891903	TLX1NB	lymphocytes	minus
chr10	103453743	103455743	FBXW4	lymphocytes	minus
chr10	104952063	104954063	NT5C2	lymphocytes	minus
chr10	105217648	105219648	CALHM1	lymphocytes	minus
chr10	106092663	106094663	ITPRIP	lymphocytes	minus
chr10	120839334	120841334	EIF3A	lymphocytes	minus
chr10	126431930	126433930	FAM53B	lymphocytes	minus
chr10	127407062	127409062	FLJ37035	lymphocytes	minus
chr10	135121660	135123660	TUBGCP2	lymphocytes	minus
chr11	441011	443011	ANO9	lymphocytes	minus
chr11	559779	561779	C11orf35	lymphocytes	minus
chr11	795263	799269	SLC25A22	lymphocytes	minus
chr11	1618524	1620524	KRTAP5-2	lymphocytes	minus
chr11	1770824	1772824	IFITM10	lymphocytes	minus
chr11	2291182	2293182	ASCL2	lymphocytes	minus
chr11	2949650	2951650	PHLDA2	lymphocytes	minus
chr11	3185582	3187582	OSBPL5	lymphocytes	minus
chr11	6340740	6342740	PRKCDBP	lymphocytes	minus
chr11	6494214	6496689	TRIM3	lymphocytes	minus
chr11	6623880	6625880	RRP8	lymphocytes	minus
chr11	6639692	6641692	TPP1	lymphocytes	minus
chr11	8189590	8191590	RIC3	lymphocytes	minus
chr11	8284406	8286406	LMO1	lymphocytes	minus
chr11	14520404	14522441	COPB1	lymphocytes	minus
chr11	14664180	14666180	PSMA1	lymphocytes	minus
chr11	18609281	18611281	UEVLD	lymphocytes	minus
chr11	18655020	18657020	SPTY2D1	lymphocytes	minus
chr11	46141985	46143985	PHF21A	lymphocytes	minus
chr11	47206432	47209010	PACSIN3	lymphocytes	minus
chr11	47269457	47271457	ACP2	lymphocytes	minus
chr11	47869057	47871057	NUP160	lymphocytes	minus
chr11	59435511	59437511	PATL1	lymphocytes	minus
chr11	59949804	59953139	MS4A6A	lymphocytes	minus
chr11	60718257	60720257	SLC15A3	lymphocytes	minus
chr11	61524136	61526136	DKFZP434K028	lymphocytes	minus
chr11	61581712	61583712	MIR1908	lymphocytes	minus
chr11	61583529	61585529	FADS1	lymphocytes	minus
chr11	61658006	61660006	FADS3	lymphocytes	minus
chr11	61734132	61736132	FTH1	lymphocytes	minus
chr11	62606628	62608628	WDR74	lymphocytes	minus
chr11	63257680	63259680	HRASLS5	lymphocytes	minus
chr11	63329855	63331855	HRASLS2	lymphocytes	minus
chr11	63535113	63537113	C11orf95	lymphocytes	minus
chr11	63992341	63994726	TRPT1	lymphocytes	minus
chr11	66138291	66140291	SLC29A2	lymphocytes	minus
chr11	67140206	67142648	CLCF1	lymphocytes	minus
chr11	67887858	67889858	CHKA	lymphocytes	minus
chr11	72144568	72146568	CLPB	lymphocytes	minus
chr11	75061875	75063875	ARRB1	lymphocytes	minus
chr11	75140674	75142674	KLHL35	lymphocytes	minus
chr11	77790265	77792265	NDUFC2	lymphocytes	minus
chr11	77790265	77792265	NDUFC2-KCTD14	lymphocytes	minus
chr11	79150695	79152695	ODZ4	lymphocytes	minus
chr11	93275546	93277546	C11orf75	lymphocytes	minus
chr11	104787902	104789902	LOC643733	lymphocytes	minus
chr11	110166437	110168437	RDX	lymphocytes	minus
chr11	110582451	110584451	ARHGAP20	lymphocytes	minus
chr11	111249157	111251157	POU2AF1	lymphocytes	minus
chr11	111287911	111289911	LOC100132078	lymphocytes	minus
chr11	117101811	117103811	PCSK7	lymphocytes	minus
chr11	118212459	118214459	CD3D	lymphocytes	minus
chr11	123251220	123253220	MIR4493	lymphocytes	minus
chr11	123847398	123849398	OR10S1	lymphocytes	minus
chr11	124631223	124633223	ESAM	lymphocytes	minus
chr11	125365206	125367206	FEZ1	lymphocytes	minus
chr12	321613	324371	SLC6A12	lymphocytes	minus
chr12	3861366	3863366	EFCAB4B	lymphocytes	minus
chr12	9599768	9601768	DDX12P	lymphocytes	minus
chr12	10281868	10283868	CLEC7A	lymphocytes	minus
chr12	12502169	12504169	MANSC1	lymphocytes	minus
chr12	25149373	25151373	C12orf77	lymphocytes	minus
chr12	32907887	32909887	YARS2	lymphocytes	minus
chr12	42631089	42633154	YAF2	lymphocytes	minus
chr12	47472734	47474734	AMIGO2	lymphocytes	minus
chr12	48297814	48299814	VDR	lymphocytes	minus
chr12	49317664	49320330	FKBP11	lymphocytes	minus
chr12	49392088	49394088	DDN	lymphocytes	minus
chr12	49411531	49413629	PRKAG1	lymphocytes	minus
chr12	50626995	50628995	MIR1293	lymphocytes	minus
chr12	51662994	51665202	SMAGP	lymphocytes	minus
chr12	51716938	51718938	BIN2	lymphocytes	minus
chr12	51784200	51786200	GALNT6	lymphocytes	minus
chr12	53600000	53602000	ITGB7	lymphocytes	minus
chr12	53728537	53731004	SP7	lymphocytes	minus
chr12	54757270	54759270	GPR84	lymphocytes	minus
chr12	56582351	56584351	SMARCC2	lymphocytes	minus
chr12	56614485	56616753	RNF41	lymphocytes	minus
chr12	57503089	57506196	STAT6	lymphocytes	minus
chr12	59312327	59315262	LRIG3	lymphocytes	minus
chr12	65015385	65017385	MIR548Z	lymphocytes	minus
chr12	68552521	68554521	IFNG	lymphocytes	minus
chr12	68618571	68620571	IL26	lymphocytes	minus
chr12	76477738	76479738	NAP1L1	lymphocytes	minus
chr12	77271799	77273799	CSRP2	lymphocytes	minus
chr12	85305608	85307608	SLC6A15	lymphocytes	minus
chr12	85429055	85431055	TSPAN19	lymphocytes	minus
chr12	89917583	89919583	GALNT4	lymphocytes	minus
chr12	89918344	89921039	POC1B	lymphocytes	minus
chr12	89919039	89921039	POC1B-GALNT4	lymphocytes	minus
chr12	95043324	95045324	TMCC3	lymphocytes	minus
chr12	95466404	95468404	NR2C1	lymphocytes	minus
chr12	102590614	102592614	PMCH	lymphocytes	minus
chr12	102871429	102875378	IGF1	lymphocytes	minus
chr12	104531040	104533040	NFYB	lymphocytes	minus
chr12	106640713	106642713	CKAP4	lymphocytes	minus
chr12	109024854	109028670	SELPLG	lymphocytes	minus
chr12	111020064	111022064	PPTC7	lymphocytes	minus
chr12	111125962	111128617	HVCN1	lymphocytes	minus
chr12	112846443	112848443	RPL6	lymphocytes	minus
chr12	113572559	113575044	RASAL1	lymphocytes	minus
chr12	116713991	116715991	MED13L	lymphocytes	minus
chr12	117536251	117538251	TESC	lymphocytes	minus
chr12	118405028	118407028	KSR2	lymphocytes	minus
chr12	120932749	120934749	LOC100506668	lymphocytes	minus
chr12	121341155	121343155	SPPL3	lymphocytes	minus
chr12	122017364	122019920	KDM2B	lymphocytes	minus
chr12	122711068	122713068	DIABLO	lymphocytes	minus
chr12	122750068	122752068	VPS33A	lymphocytes	minus
chr12	122906116	122908116	CLIP1	lymphocytes	minus
chr12	123214129	123216129	HCAR1	lymphocytes	minus
chr12	123755687	123757687	CDK2AP1	lymphocytes	minus
chr13	20734183	20736183	GJA3	lymphocytes	minus
chr13	20804372	20807534	GJB6	lymphocytes	minus
chr13	24462587	24464587	MIPEP	lymphocytes	minus
chr13	26624198	26626198	SHISA2	lymphocytes	minus
chr13	30947036	30949036	LINC00426	lymphocytes	minus
chr13	31039081	31041081	HMGB1	lymphocytes	minus
chr13	37572504	37574504	ALG5	lymphocytes	minus
chr13	40793639	40795639	LINC00548	lymphocytes	minus
chr13	41239734	41241734	FOXO1	lymphocytes	minus
chr13	45914297	45916297	TPT1	lymphocytes	minus
chr13	48574462	48576462	SUCLA2	lymphocytes	minus
chr13	52702214	52704214	NEK5	lymphocytes	minus
chr13	52732670	52734996	NEK3	lymphocytes	minus
chr13	77459540	77461540	KCTD12	lymphocytes	minus
chr13	79176695	79178695	POU4F1	lymphocytes	minus
chr13	80914086	80916086	SPRY2	lymphocytes	minus
chr13	95247511	95249511	TGDS	lymphocytes	minus
chr13	99909682	99911682	GPR18	lymphocytes	minus
chr13	101326103	101328103	TMTC4	lymphocytes	minus
chr13	113621952	113623952	MCF2L-AS1	lymphocytes	minus
chr13	113862029	113864029	PCID2	lymphocytes	minus
chr14	21501944	21503944	RNASE13	lymphocytes	minus
chr14	23478360	23480360	C14orf93	lymphocytes	minus
chr14	23525747	23527747	CDH24	lymphocytes	minus
chr14	23587820	23589820	CEBPE	lymphocytes	minus
chr14	24779576	24781576	CIDEB	lymphocytes	minus
chr14	24808242	24810242	RIPK3	lymphocytes	minus
chr14	25077864	25079864	GZMH	lymphocytes	minus
chr14	25102432	25104432	GZMB	lymphocytes	minus
chr14	39571437	39573437	SEC23A	lymphocytes	minus
chr14	50154098	50156098	POLE2	lymphocytes	minus
chr14	50998376	51000376	MAP4K5	lymphocytes	minus
chr14	51134023	51136023	SAV1	lymphocytes	minus
chr14	51296839	51298839	NIN	lymphocytes	minus
chr14	52534946	52536946	NID2	lymphocytes	minus
chr14	53018301	53020301	TXNDC16	lymphocytes	minus
chr14	53161419	53163419	ERO1L	lymphocytes	minus
chr14	55368542	55370542	GCH1	lymphocytes	minus
chr14	59931059	59933059	GPR135	lymphocytes	minus
chr14	65800901	65802901	MIR4708	lymphocytes	minus
chr14	67877828	67879828	PLEK2	lymphocytes	minus
chr14	67981021	67983021	TMEM229B	lymphocytes	minus
chr14	70882807	70884807	SYNJ2BP	lymphocytes	minus
chr14	70882807	70884807	SYNJ2BP-COX16	lymphocytes	minus
chr14	74180128	74182128	PNMA1	lymphocytes	minus
chr14	76447092	76449092	TGFB3	lymphocytes	minus
chr14	77964210	77966210	ISM2	lymphocytes	minus
chr14	80676864	80678970	DIO2	lymphocytes	minus
chr14	81404884	81406884	CEP128	lymphocytes	minus
chr14	92505403	92507403	TRIP11	lymphocytes	minus
chr14	92571965	92573965	ATXN3	lymphocytes	minus
chr14	93214047	93216047	LGMN	lymphocytes	minus
chr14	93581263	93583263	ITPK1	lymphocytes	minus
chr14	95235499	95237499	GSC	lymphocytes	minus
chr14	98443461	98445461	C14orf64	lymphocytes	minus
chr14	100069727	100071727	CCDC85C	lymphocytes	minus
chr14	100625012	100627012	DEGS2	lymphocytes	minus
chr14	104027655	104030151	BAG5	lymphocytes	minus
chr14	105646660	105648660	NUDT14	lymphocytes	minus
chr15	23207357	23209357	WHAMMP3	lymphocytes	minus
chr15	29561020	29563020	NDNL2	lymphocytes	minus
chr15	30113706	30115706	TJP1	lymphocytes	minus
chr15	30684864	30686864	CHRFAM7A	lymphocytes	minus
chr15	31522050	31524050	LOC283710	lymphocytes	minus
chr15	34330303	34332303	AVEN	lymphocytes	minus
chr15	40599174	40601174	PLCB2	lymphocytes	minus
chr15	41805085	41807085	LTK	lymphocytes	minus
chr15	42263755	42265755	EHD4	lymphocytes	minus
chr15	43940039	43942039	CATSPER2	lymphocytes	minus
chr15	44068502	44070502	ELL3	lymphocytes	minus
chr15	45814002	45816002	SLC30A4	lymphocytes	minus
chr15	49102343	49104343	CEP152	lymphocytes	minus
chr15	49254641	49256641	SHC4	lymphocytes	minus
chr15	50410419	50412419	ATP8B4	lymphocytes	minus
chr15	50646076	50648076	FLJ10038	lymphocytes	minus
chr15	50646605	50648605	GABPB1	lymphocytes	minus
chr15	51913967	51915967	DMXL2	lymphocytes	minus
chr15	52403972	52405972	BCL2L10	lymphocytes	minus
chr15	60689185	60691185	ANXA2	lymphocytes	minus
chr15	67812311	67815182	LOC100506686	lymphocytes	minus
chr15	72521063	72524727	PKM2	lymphocytes	minus
chr15	73075126	73077126	ADPGK	lymphocytes	minus
chr15	74219127	74221589	LOC100287616	lymphocytes	minus
chr15	75016877	75018877	CYP1A1	lymphocytes	minus
chr15	75248775	75250775	RPP25	lymphocytes	minus
chr15	75931664	75933664	IMP3	lymphocytes	minus
chr15	78285567	78287567	LOC91450	lymphocytes	minus
chr15	78368994	78370994	TBC1D2B	lymphocytes	minus
chr15	83473806	83475806	FSD2	lymphocytes	minus
chr15	89154155	89156155	MIR3529	lymphocytes	minus
chr15	90232958	90234958	PEX11A	lymphocytes	minus
chr15	91474774	91476774	HDDC3	lymphocytes	minus
chr15	93198031	93200031	FAM174B	lymphocytes	minus
chr15	102263645	102265645	TARSL2	lymphocytes	minus
chr16	278449	280449	LUC7L	lymphocytes	minus
chr16	775473	777473	CCDC78	lymphocytes	minus
chr16	1279185	1281185	TPSB2	lymphocytes	minus
chr16	1493490	1495490	CCDC154	lymphocytes	minus
chr16	1820710	1822710	NME3	lymphocytes	minus
chr16	1822140	1824140	MRPS34	lymphocytes	minus
chr16	2891752	2893752	PRSS30P	lymphocytes	minus
chr16	3284186	3286457	ZNF200	lymphocytes	minus
chr16	3492490	3494490	ZNF597	lymphocytes	minus
chr16	3929121	3931121	CREBBP	lymphocytes	minus
chr16	4165186	4167186	ADCY9	lymphocytes	minus
chr16	4322001	4324001	TFAP4	lymphocytes	minus
chr16	4465962	4467962	CORO7	lymphocytes	minus
chr16	4465962	4467962	CORO7-PAM16	lymphocytes	minus
chr16	4663927	4665927	FAM100A	lymphocytes	minus
chr16	4896303	4898303	GLYR1	lymphocytes	minus
chr16	18936726	18938726	SMG1	lymphocytes	minus
chr16	21435658	21437658	NPIPL3	lymphocytes	minus
chr16	21512602	21514602	LOC100271836	lymphocytes	minus
chr16	22448036	22450036	RRN3P3	lymphocytes	minus
chr16	23520815	23522815	GGA2	lymphocytes	minus
chr16	28890242	28892242	LOC100289092	lymphocytes	minus
chr16	29909585	29911585	SEZ6L2	lymphocytes	minus
chr16	30123878	30125878	GDPD3	lymphocytes	minus
chr16	31213097	31215097	PYCARD	lymphocytes	minus
chr16	31438749	31440749	COX6A2	lymphocytes	minus
chr16	46654311	46656311	SHCBP1	lymphocytes	minus
chr16	47176936	47178936	NETO2	lymphocytes	minus
chr16	50714264	50716264	SNX20	lymphocytes	minus
chr16	54319378	54321378	IRX3	lymphocytes	minus
chr16	54961690	54964079	CRNDE	lymphocytes	minus
chr16	55866075	55868075	CES1	lymphocytes	minus
chr16	56224006	56226006	LOC283856	lymphocytes	minus
chr16	57317584	57319584	PLLP	lymphocytes	minus
chr16	57519385	57521385	DOK4	lymphocytes	minus
chr16	66863879	66865879	NAE1	lymphocytes	minus
chr16	67183902	67185902	B3GNT9	lymphocytes	minus
chr16	67359661	67361661	KCTD19	lymphocytes	minus
chr16	68032364	68034364	DPEP2	lymphocytes	minus
chr16	71916444	71919093	ZNF821	lymphocytes	minus
chr16	74733789	74735789	MLKL	lymphocytes	minus
chr16	80837175	80839175	CDYL2	lymphocytes	minus
chr16	82044093	82046093	SDR42E1	lymphocytes	minus
chr16	87350026	87352026	C16orf95	lymphocytes	minus
chr16	87798598	87800598	KLHDC4	lymphocytes	minus
chr16	87902100	87904100	SLC7A5	lymphocytes	minus
chr16	88850372	88852372	PIEZO1	lymphocytes	minus
chr17	1531130	1533130	SLC43A2	lymphocytes	minus
chr17	1927178	1929178	RTN4RL1	lymphocytes	minus
chr17	3460289	3462289	TRPV3	lymphocytes	minus
chr17	3598698	3600698	P2RX5-TAX1BP3	lymphocytes	minus
chr17	3598698	3600698	P2RX5	lymphocytes	minus
chr17	4606632	4608632	PELP1	lymphocytes	minus
chr17	4642223	4644223	CXCL16	lymphocytes	minus
chr17	5137083	5139083	SCIMP	lymphocytes	minus
chr17	5322059	5324059	NUP88	lymphocytes	minus
chr17	7141825	7143825	PHF23	lymphocytes	minus
chr17	7144753	7146753	GABARAP	lymphocytes	minus
chr17	7196876	7198876	YBX2	lymphocytes	minus
chr17	7831753	7833753	KCNAB3	lymphocytes	minus
chr17	7834267	7836317	TRAPPC1	lymphocytes	minus
chr17	8150413	8152413	CTC1	lymphocytes	minus
chr17	16255812	16257812	CENPV	lymphocytes	minus
chr17	16394480	16396480	FAM211A	lymphocytes	minus
chr17	17941480	17943480	ATPAF2	lymphocytes	minus
chr17	18160870	18163230	FLII	lymphocytes	minus
chr17	18217321	18219321	TOP3A	lymphocytes	minus
chr17	18949336	18951336	GRAP	lymphocytes	minus
chr17	19770239	19772239	ULK2	lymphocytes	minus
chr17	20798453	20800453	CCDC144NL	lymphocytes	minus
chr17	26971177	26973177	KIAA0100	lymphocytes	minus
chr17	27043908	27046286	RAB34	lymphocytes	minus
chr17	28256018	28258018	SSH2	lymphocytes	minus
chr17	28618184	28620184	BLMH	lymphocytes	minus
chr17	30668228	30670228	C17orf75	lymphocytes	minus
chr17	33813758	33815758	SLFN12L	lymphocytes	minus
chr17	34206377	34208377	CCL5	lymphocytes	minus
chr17	37381040	37383040	STAC2	lymphocytes	minus
chr17	38082884	38084884	ORMDL3	lymphocytes	minus
chr17	38803103	38805103	SMARCE1	lymphocytes	minus
chr17	39525047	39527047	KRT33B	lymphocytes	minus
chr17	39991488	39993523	NT5C3L	lymphocytes	minus
chr17	40306062	40308062	RAB5C	lymphocytes	minus
chr17	40336470	40338470	HCRT	lymphocytes	minus
chr17	41131020	41133545	AARSD1	lymphocytes	minus
chr17	41737931	41740262	MEOX1	lymphocytes	minus
chr17	41855368	41857368	DUSP3	lymphocytes	minus
chr17	42274529	42276529	ATXN7L3	lymphocytes	minus
chr17	45907907	45909907	MRPL10	lymphocytes	minus
chr17	46506594	46508594	SKAP1	lymphocytes	minus
chr17	46702835	46704835	HOXB9	lymphocytes	minus
chr17	47438476	47440835	ZNF652	lymphocytes	minus
chr17	47840518	47842518	FAM117A	lymphocytes	minus
chr17	48132103	48134103	LOC284080	lymphocytes	minus
chr17	48206167	48208167	SAMD14	lymphocytes	minus
chr17	48942715	48946339	TOB1	lymphocytes	minus
chr17	50235132	50238377	CA10	lymphocytes	minus
chr17	54990409	54992409	TRIM25	lymphocytes	minus
chr17	56064615	56066615	VEZF1	lymphocytes	minus
chr17	61818330	61820330	STRADA	lymphocytes	minus
chr17	61919351	61921351	SMARCD2	lymphocytes	minus
chr17	62008704	62010704	CD79B	lymphocytes	minus
chr17	62339653	62341653	TEX2	lymphocytes	minus
chr17	62776622	62779117	LOC146880	lymphocytes	minus
chr17	65988765	65990765	C17orf58	lymphocytes	minus
chr17	66286405	66288405	SLC16A6	lymphocytes	minus
chr17	73510627	73512627	CASKIN2	lymphocytes	minus
chr17	73839798	73841798	UNC13D	lymphocytes	minus
chr17	73873656	73875656	TRIM47	lymphocytes	minus
chr17	74235390	74237390	RNF157	lymphocytes	minus
chr17	79875058	79877058	SIRT7	lymphocytes	minus
chr17	80169689	80171689	CCDC57	lymphocytes	minus
chr17	80274480	80276480	CD7	lymphocytes	minus
chr17	80290921	80292921	SECTM1	lymphocytes	minus
chr17	80406602	80409707	C17orf62	lymphocytes	minus
chr18	811327	813327	YES1	lymphocytes	minus
chr18	28741819	28743819	DSC1	lymphocytes	minus
chr18	32956301	32958301	ZNF396	lymphocytes	minus
chr18	43651250	43653250	PSTPIP2	lymphocytes	minus
chr18	51747782	51749782	SNORA37	lymphocytes	minus
chr18	56295189	56297189	ALPK2	lymphocytes	minus
chr18	61033506	61035506	KDSR	lymphocytes	minus
chr18	72920281	72922281	ZADH2	lymphocytes	minus
chr18	74533251	74535251	LOC100131655	lymphocytes	minus
chr19	1400569	1402569	GAMT	lymphocytes	minus
chr19	1591652	1593652	MBD3	lymphocytes	minus
chr19	1862564	1864564	KLF16	lymphocytes	minus
chr19	2255422	2257422	JSRP1	lymphocytes	minus
chr19	2455958	2457958	LMNB2	lymphocytes	minus
chr19	3061371	3063964	AES	lymphocytes	minus
chr19	4301428	4303428	TMIGD2	lymphocytes	minus
chr19	4722855	4724855	DPP9	lymphocytes	minus
chr19	6480798	6482798	DENND1C	lymphocytes	minus
chr19	6590163	6592163	CD70	lymphocytes	minus
chr19	6669599	6671599	TNFSF14	lymphocytes	minus
chr19	7537247	7539247	LOC100128573	lymphocytes	minus
chr19	8407146	8409146	KANK3	lymphocytes	minus
chr19	10340948	10342948	S1PR2	lymphocytes	minus
chr19	10675702	10677702	KRI1	lymphocytes	minus
chr19	12779465	12781465	WDR83OS	lymphocytes	minus
chr19	12911694	12913694	PRDX2	lymphocytes	minus
chr19	13946103	13948103	LOC284454	lymphocytes	minus
chr19	13946173	13948173	MIR24-2	lymphocytes	minus
chr19	13946331	13948331	MIR27A	lymphocytes	minus
chr19	13946473	13948473	MIR23A	lymphocytes	minus
chr19	14116134	14118134	RFX1	lymphocytes	minus
chr19	14528906	14531195	DDX39A	lymphocytes	minus
chr19	15342231	15344858	EPHX3	lymphocytes	minus
chr19	15574382	15576382	RASAL3	lymphocytes	minus
chr19	16044676	16046676	CYP4F11	lymphocytes	minus
chr19	17185343	17187343	HAUS8	lymphocytes	minus
chr19	17444638	17446638	ANO8	lymphocytes	minus
chr19	17558376	17560376	TMEM221	lymphocytes	minus
chr19	19738039	19740039	LPAR2	lymphocytes	minus
chr19	19753455	19755455	GMIP	lymphocytes	minus
chr19	20606771	20608771	ZNF826P	lymphocytes	minus
chr19	20747626	20749626	ZNF737	lymphocytes	minus
chr19	36035931	36037931	LOC100506469	lymphocytes	minus
chr19	36246930	36248930	HSPB6	lymphocytes	minus
chr19	36341895	36343895	NPHS1	lymphocytes	minus
chr19	36390552	36392552	NFKBID	lymphocytes	minus
chr19	38344836	38346836	LOC100631378	lymphocytes	minus
chr19	38877668	38879668	GGN	lymphocytes	minus
chr19	39107643	39109643	MAP4K1	lymphocytes	minus
chr19	40227669	40229669	CLC	lymphocytes	minus
chr19	40723306	40725306	TTC9B	lymphocytes	minus
chr19	40790302	40792302	AKT2	lymphocytes	minus
chr19	40970725	40972725	BLVRB	lymphocytes	minus
chr19	41933635	41935635	B3GNT8	lymphocytes	minus
chr19	42462528	42464528	RABAC1	lymphocytes	minus
chr19	42758309	42760309	ERF	lymphocytes	minus
chr19	43031661	43033661	CEACAM1	lymphocytes	minus
chr19	44142991	44144991	CADM4	lymphocytes	minus
chr19	44404955	44406955	LOC100505715	lymphocytes	minus
chr19	45578688	45580688	ZNF296	lymphocytes	minus
chr19	45907312	45910607	PPP1R13L	lymphocytes	minus
chr19	46973820	46975820	PNMAL1	lymphocytes	minus
chr19	47248720	47250720	STRN4	lymphocytes	minus
chr19	47729276	47731276	MIR3191	lymphocytes	minus
chr19	48893810	48895810	KDELR1	lymphocytes	minus
chr19	49519347	49521347	LHB	lymphocytes	minus
chr19	49925698	49927698	PTH2	lymphocytes	minus
chr19	50003125	50005125	MIR150	lymphocytes	minus
chr19	50369822	50371822	PNKP	lymphocytes	minus
chr19	50431762	50433762	IL4I1	lymphocytes	minus
chr19	50431773	50433988	NUP62	lymphocytes	minus
chr19	50847005	50849005	NAPSB	lymphocytes	minus
chr19	50867931	50869931	NAPSA	lymphocytes	minus
chr19	51140302	51144092	SYT3	lymphocytes	minus
chr19	51219195	51221195	SHANK1	lymphocytes	minus
chr19	51890210	51892210	LIM2	lymphocytes	minus
chr19	53635171	53637173	ZNF415	lymphocytes	minus
chr19	54618055	54620055	TFPT	lymphocytes	minus
chr19	59083942	59085942	MZF1	lymphocytes	minus
chr2	263068	265068	SH3YL1	lymphocytes	minus
chr2	10219538	10221538	CYS1	lymphocytes	minus
chr2	16846134	16848134	FAM49A	lymphocytes	minus
chr2	17698706	17700706	RAD51AP2	lymphocytes	minus
chr2	21265945	21267945	APOB	lymphocytes	minus
chr2	25141055	25143055	ADCY3	lymphocytes	minus
chr2	27578868	27580868	GTF3C2	lymphocytes	minus
chr2	38302323	38304323	CYP1B1	lymphocytes	minus
chr2	39455673	39457673	CDKL4	lymphocytes	minus
chr2	39663219	39665219	MAP4K3	lymphocytes	minus
chr2	42179943	42181943	C2orf91	lymphocytes	minus
chr2	42720237	42722237	KCNG3	lymphocytes	minus
chr2	43902461	43904461	LOC728819	lymphocytes	minus
chr2	47167994	47169994	MCFD2	lymphocytes	minus
chr2	55458449	55460699	C2orf63	lymphocytes	minus
chr2	63274656	63276656	LOC100132215	lymphocytes	minus
chr2	64245214	64247214	VPS54	lymphocytes	minus
chr2	69869977	69871977	AAK1	lymphocytes	minus
chr2	70780147	70782147	TGFA	lymphocytes	minus
chr2	73339146	73341146	RAB11FIP5	lymphocytes	minus
chr2	73495758	73497758	FBXO41	lymphocytes	minus
chr2	74752408	74754408	DQX1	lymphocytes	minus
chr2	85765009	85767009	LOC100630918	lymphocytes	minus
chr2	96780888	96782888	ADRA2B	lymphocytes	minus
chr2	97534735	97536735	SEMA4C	lymphocytes	minus
chr2	98611354	98613354	TMEM131	lymphocytes	minus
chr2	101033130	101035130	CHST10	lymphocytes	minus
chr2	101888511	101890511	SNORD89	lymphocytes	minus
chr2	105945148	105947148	TGFBRAP1	lymphocytes	minus
chr2	109604828	109606828	EDAR	lymphocytes	minus
chr2	110370783	110372783	2010-09-01	lymphocytes	minus
chr2	111141102	111143102	LOC440894	lymphocytes	minus
chr2	111141113	111143113	LOC151009	lymphocytes	minus
chr2	112251692	112253692	LOC541471	lymphocytes	minus
chr2	129075171	129077171	HS6ST1	lymphocytes	minus
chr2	136633011	136635011	MCM6	lymphocytes	minus
chr2	157188287	157190287	NR4A2	lymphocytes	minus
chr2	160760267	160762267	LY75	lymphocytes	minus
chr2	160760267	160762267	LY75-CD302	lymphocytes	minus
chr2	161263393	161265393	MIR4785	lymphocytes	minus
chr2	161349318	161351318	RBMS1	lymphocytes	minus
chr2	162930052	162932052	DPP4	lymphocytes	minus
chr2	174827947	174831430	SP3	lymphocytes	minus
chr2	176045391	176047490	ATP5G3	lymphocytes	minus
chr2	179913786	179915786	CCDC141	lymphocytes	minus
chr2	188418219	188420219	TFPI	lymphocytes	minus
chr2	197790454	197792454	PGAP1	lymphocytes	minus
chr2	201598900	201600900	LOC100507140	lymphocytes	minus
chr2	202562417	202564417	MPP4	lymphocytes	minus
chr2	204399058	204401058	RAPH1	lymphocytes	minus
chr2	220040702	220042702	CNPPD1	lymphocytes	minus
chr2	224902357	224905036	SERPINE2	lymphocytes	minus
chr2	225874257	225876257	MIR4439	lymphocytes	minus
chr2	228028275	228030275	COL4A4	lymphocytes	minus
chr2	230578286	230580286	DNER	lymphocytes	minus
chr2	231089444	231091444	SP110	lymphocytes	minus
chr2	231988824	231990824	HTR2B	lymphocytes	minus
chr2	232790038	232792038	NPPC	lymphocytes	minus
chr2	234473236	234475236	USP40	lymphocytes	minus
chr2	240963819	240965819	NDUFA10	lymphocytes	minus
chr2	242800058	242802058	PDCD1	lymphocytes	minus
chr20	655823	657823	SCRT2	lymphocytes	minus
chr20	1305513	1307513	SDCBP2	lymphocytes	minus
chr20	1599689	1601689	SIRPB1	lymphocytes	minus
chr20	1637425	1639425	SIRPG	lymphocytes	minus
chr20	5106268	5108268	PCNA	lymphocytes	minus
chr20	5590672	5592672	GPCPD1	lymphocytes	minus
chr20	7999393	8001393	TMX4	lymphocytes	minus
chr20	17661928	17663928	RRBP1	lymphocytes	minus
chr20	17948154	17950490	SNX5	lymphocytes	minus
chr20	18476887	18478887	RBBP9	lymphocytes	minus
chr20	23065977	23067977	CD93	lymphocytes	minus
chr20	25565153	25567153	NINL	lymphocytes	minus
chr20	26187914	26189914	MIR663A	lymphocytes	minus
chr20	26188869	26190869	LOC284801	lymphocytes	minus
chr20	31330814	31332814	COMMD7	lymphocytes	minus
chr20	33412433	33414433	NCOA6	lymphocytes	minus
chr20	35723410	35725410	RBL1	lymphocytes	minus
chr20	39316876	39318876	MAFB	lymphocytes	minus
chr20	43588114	43590114	TOMM34	lymphocytes	minus
chr20	43976064	43978064	SDC4	lymphocytes	minus
chr20	44419547	44421547	WFDC3	lymphocytes	minus
chr20	44992064	44994064	SLC35C2	lymphocytes	minus
chr20	45178213	45180213	C20orf123	lymphocytes	minus
chr20	50383908	50385908	ATP9A	lymphocytes	minus
chr20	52684024	52686024	MIR4756	lymphocytes	minus
chr20	56194632	56196632	ZBP1	lymphocytes	minus
chr20	57391749	57393749	MIR296	lymphocytes	minus
chr20	57392368	57394368	MIR298	lymphocytes	minus
chr20	57424958	57426958	GNAS-AS1	lymphocytes	minus
chr20	57616901	57618901	SLMO2	lymphocytes	minus
chr20	57616901	57618901	SLMO2-ATP5E	lymphocytes	minus
chr20	61407208	61409208	LOC100652730	lymphocytes	minus
chr20	61732671	61734671	HAR1B	lymphocytes	minus
chr20	62129505	62131505	EEF1A2	lymphocytes	minus
chr20	62709845	62712324	RGS19	lymphocytes	minus
chr21	31873408	31875408	KRTAP19-5	lymphocytes	minus
chr21	31985223	31987223	KRTAP6-1	lymphocytes	minus
chr21	32090095	32092095	KRTAP21-3	lymphocytes	minus
chr21	34637565	34639565	LOC100288432	lymphocytes	minus
chr21	40684712	40686712	BRWD1	lymphocytes	minus
chr21	40685888	40687888	BRWD1-IT2	lymphocytes	minus
chr21	43186249	43188249	RIPK4	lymphocytes	minus
chr21	46073576	46075576	KRTAP12-4	lymphocytes	minus
chr21	46339965	46341965	ITGB2	lymphocytes	minus
chr22	17601213	17603257	CECR6	lymphocytes	minus
chr22	19136796	19138796	GSC2	lymphocytes	minus
chr22	19278239	19280239	CLTCL1	lymphocytes	minus
chr22	19434755	19436755	C22orf39	lymphocytes	minus
chr22	19928359	19930359	TXNRD2	lymphocytes	minus
chr22	20849170	20851170	KLHL22	lymphocytes	minus
chr22	21367576	21369576	MGC16703	lymphocytes	minus
chr22	29074853	29076853	TTC28	lymphocytes	minus
chr22	29728247	29730247	SNORD125	lymphocytes	minus
chr22	29728256	29730256	MIR3653	lymphocytes	minus
chr22	30661829	30663829	OSM	lymphocytes	minus
chr22	31002000	31004000	PES1	lymphocytes	minus
chr22	37414491	37416491	TST	lymphocytes	minus
chr22	38712413	38715089	CSNK1E	lymphocytes	minus
chr22	41214392	41216392	SLC25A17	lymphocytes	minus
chr22	41681216	41683216	RANGAP1	lymphocytes	minus
chr22	42321821	42323821	TNFRSF13C	lymphocytes	minus
chr22	43252408	43254408	ARFGAP3	lymphocytes	minus
chr22	47133152	47135152	CERK	lymphocytes	minus
chr22	50707779	50709779	MAPK11	lymphocytes	minus
chr3	3151058	3153058	IL5RA	lymphocytes	minus
chr3	10027522	10029522	TMEM111	lymphocytes	minus
chr3	13920618	13922618	WNT7A	lymphocytes	minus
chr3	15139655	15141655	ZFYVE20	lymphocytes	minus
chr3	27762785	27764785	EOMES	lymphocytes	minus
chr3	39233077	39235085	XIRP1	lymphocytes	minus
chr3	45266814	45268814	TMEM158	lymphocytes	minus
chr3	46036316	46038316	FYCO1	lymphocytes	minus
chr3	46607040	46609040	LRRC2	lymphocytes	minus
chr3	47822405	47824405	SMARCC1	lymphocytes	minus
chr3	48469872	48472460	PLXNB1	lymphocytes	minus
chr3	48699348	48701348	CELSR3	lymphocytes	minus
chr3	48935426	48937426	SLC25A20	lymphocytes	minus
chr3	49590799	49592799	BSN-AS2	lymphocytes	minus
chr3	50382156	50384156	ZMYND10	lymphocytes	minus
chr3	50539892	50541892	CACNA2D2	lymphocytes	minus
chr3	51936386	51938386	IQCF1	lymphocytes	minus
chr3	51974922	51976922	RRP9	lymphocytes	minus
chr3	52007646	52009646	ABHD14B	lymphocytes	minus
chr3	53078335	53081089	SFMBT1	lymphocytes	minus
chr3	53924989	53926989	SELK	lymphocytes	minus
chr3	57582215	57584215	ARF4	lymphocytes	minus
chr3	62303622	62305622	LOC100506994	lymphocytes	minus
chr3	69434430	69436430	FRMD4B	lymphocytes	minus
chr3	72896598	72898598	SHQ1	lymphocytes	minus
chr3	110787806	110789806	PVRL3-AS1	lymphocytes	minus
chr3	112217408	112219408	BTLA	lymphocytes	minus
chr3	113896899	113898899	DRD3	lymphocytes	minus
chr3	114034416	114036416	MIR568	lymphocytes	minus
chr3	121740127	121742127	ILDR1	lymphocytes	minus
chr3	122133882	122135882	WDR5B	lymphocytes	minus
chr3	126372967	126374967	TXNRD3	lymphocytes	minus
chr3	132377975	132379975	ACAD11	lymphocytes	minus
chr3	135912310	135915688	MSL2	lymphocytes	minus
chr3	149374812	149376888	WWTR1	lymphocytes	minus
chr3	149687741	149689741	PFN2	lymphocytes	minus
chr3	151033636	151035636	GPR87	lymphocytes	minus
chr3	151986415	151988415	LOC401093	lymphocytes	minus
chr3	153837999	153839999	ARHGEF26-AS1	lymphocytes	minus
chr3	160821683	160824160	B3GALNT1	lymphocytes	minus
chr3	169683522	169685522	LOC100128164	lymphocytes	minus
chr3	178788656	178790656	ZMAT3	lymphocytes	minus
chr3	180396283	180398283	CCDC39	lymphocytes	minus
chr3	182879667	182881667	LAMP3	lymphocytes	minus
chr3	183144855	183146855	MCF2L2	lymphocytes	minus
chr3	184428836	184430836	MAGEF1	lymphocytes	minus
chr3	192634950	192636950	MB21D2	lymphocytes	minus
chr3	195162817	195164817	ACAP2	lymphocytes	minus
chr3	196229639	196231639	RNF168	lymphocytes	minus
chr3	196755686	196757687	MFI2	lymphocytes	minus
chr4	818945	820945	CPLX1	lymphocytes	minus
chr4	1106352	1108352	RNF212	lymphocytes	minus
chr4	1201750	1203750	LOC100130872	lymphocytes	minus
chr4	1201750	1203750	SPON2	lymphocytes	minus
chr4	1241908	1243908	CTBP1	lymphocytes	minus
chr4	2934964	2937586	MFSD10	lymphocytes	minus
chr4	3075241	3077241	HTT-AS1	lymphocytes	minus
chr4	4542775	4544775	STX18	lymphocytes	minus
chr4	6201318	6203318	JAKMIP1	lymphocytes	minus
chr4	7068800	7070800	GRPEL1	lymphocytes	minus
chr4	15002669	15004669	LOC441009	lymphocytes	minus
chr4	37686999	37688999	RELL1	lymphocytes	minus
chr4	38783611	38785611	TLR10	lymphocytes	minus
chr4	39033041	39035041	TMEM156	lymphocytes	minus
chr4	40057819	40059819	LOC344967	lymphocytes	minus
chr4	40503136	40505136	MIR4802	lymphocytes	minus
chr4	57686893	57688893	SPINK2	lymphocytes	minus
chr4	76943689	76945689	CXCL10	lymphocytes	minus
chr4	84254966	84257306	HPSE	lymphocytes	minus
chr4	90228161	90230161	GPRIN3	lymphocytes	minus
chr4	96469361	96471361	UNC5C	lymphocytes	minus
chr4	100866879	100868879	DNAJB14	lymphocytes	minus
chr4	103997170	103999170	SLC9B2	lymphocytes	minus
chr4	107956453	107958453	DKK2	lymphocytes	minus
chr4	119272922	119274922	PRSS12	lymphocytes	minus
chr4	121992673	121994673	NDNF	lymphocytes	minus
chr4	123376650	123378650	IL2	lymphocytes	minus
chr4	125632887	125634887	ANKRD50	lymphocytes	minus
chr4	138452629	138454629	PCDH18	lymphocytes	minus
chr4	141293546	141295546	LOC100129858	lymphocytes	minus
chr4	143766604	143768604	INPP4B	lymphocytes	minus
chr4	144620828	144622828	FREM3	lymphocytes	minus
chr4	146858607	146860607	ZNF827	lymphocytes	minus
chr4	164087073	164089073	NAF1	lymphocytes	minus
chr4	168154577	168156741	SPOCK3	lymphocytes	minus
chr4	177712895	177714895	VEGFC	lymphocytes	minus
chr4	183837630	183839630	DCTD	lymphocytes	minus
chr4	185771264	185773264	MIR3945	lymphocytes	minus
chr4	187643987	187645987	FAT1	lymphocytes	minus
chr5	1111172	1113172	SLC12A7	lymphocytes	minus
chr5	1294162	1296162	TERT	lymphocytes	minus
chr5	9545233	9547233	SEMA5A	lymphocytes	minus
chr5	32173425	32175425	GOLPH3	lymphocytes	minus
chr5	36151015	36153015	LMBRD2	lymphocytes	minus
chr5	36301011	36303011	RANBP3L	lymphocytes	minus
chr5	39073501	39075501	RICTOR	lymphocytes	minus
chr5	40834387	40836387	RPL37	lymphocytes	minus
chr5	43017913	43019913	LOC648987	lymphocytes	minus
chr5	43039447	43041447	C5orf39	lymphocytes	minus
chr5	43066073	43068073	LOC100132356	lymphocytes	minus
chr5	49736234	49738234	EMB	lymphocytes	minus
chr5	54465450	54467450	MIR449A	lymphocytes	minus
chr5	54465570	54467570	MIR449B	lymphocytes	minus
chr5	54467181	54469181	MIR449C	lymphocytes	minus
chr5	54468005	54470005	CDC20B	lymphocytes	minus
chr5	60239905	60241905	ERCC8	lymphocytes	minus
chr5	70319941	70321941	NAIP	lymphocytes	minus
chr5	74161615	74163615	FAM169A	lymphocytes	minus
chr5	79286088	79288088	MTX3	lymphocytes	minus
chr5	90678149	90680149	ARRDC3	lymphocytes	minus
chr5	98107788	98109788	FLJ35946	lymphocytes	minus
chr5	100237970	100239987	ST8SIA4	lymphocytes	minus
chr5	107716799	107718799	FBXL17	lymphocytes	minus
chr5	114937176	114939176	TICAM2	lymphocytes	minus
chr5	115909551	115911551	SEMA6A	lymphocytes	minus
chr5	131704608	131706608	LOC553103	lymphocytes	minus
chr5	132112067	132114561	2008-09-01	lymphocytes	minus
chr5	134733928	134736577	H2AFY	lymphocytes	minus
chr5	135469579	135471579	SMAD5-AS1	lymphocytes	minus
chr5	138724605	138726605	MZB1	lymphocytes	minus
chr5	140012035	140014286	CD14	lymphocytes	minus
chr5	148930007	148932007	CSNK1A1	lymphocytes	minus
chr5	149491935	149493935	CSF1R	lymphocytes	minus
chr5	149534422	149536422	PDGFRB	lymphocytes	minus
chr5	156771729	156773729	FNDC9	lymphocytes	minus
chr5	157001783	157003783	ADAM19	lymphocytes	minus
chr5	169723822	169725822	LCP2	lymphocytes	minus
chr5	173042666	173044666	BOD1	lymphocytes	minus
chr5	174870163	174872163	DRD1	lymphocytes	minus
chr5	176036131	176038131	GPRIN1	lymphocytes	minus
chr5	176055501	176057501	MIR4281	lymphocytes	minus
chr5	176056557	176058557	SNCB	lymphocytes	minus
chr5	176935858	176938427	DOK3	lymphocytes	minus
chr5	177098278	177100278	LOC202181	lymphocytes	minus
chr5	177658803	177660803	AGXT2L2	lymphocytes	minus
chr5	178016556	178018556	COL23A1	lymphocytes	minus
chr5	179049722	179051722	HNRNPH1	lymphocytes	minus
chr5	179718071	179720071	MAPK9	lymphocytes	minus
chr5	180257618	180259618	LOC100859930	lymphocytes	minus
chr5	180687119	180689119	TRIM52	lymphocytes	minus
chr6	692109	694109	EXOC2	lymphocytes	minus
chr6	2853341	2855341	MIR4645	lymphocytes	minus
chr6	3226968	3228968	TUBB2B	lymphocytes	minus
chr6	16760721	16762721	ATXN1	lymphocytes	minus
chr6	17986854	17988854	KIF13A	lymphocytes	minus
chr6	18154374	18156374	TPMT	lymphocytes	minus
chr6	25873471	25875471	SLC17A3	lymphocytes	minus
chr6	26026480	26028480	HIST1H4B	lymphocytes	minus
chr6	26249835	26251835	HIST1H3F	lymphocytes	minus
chr6	27113637	27115637	HIST1H2BK	lymphocytes	minus
chr6	27857570	27859570	HIST1H3J	lymphocytes	minus
chr6	28554112	28556112	SCAND3	lymphocytes	minus
chr6	28890768	28892768	TRIM27	lymphocytes	minus
chr6	29759850	29761850	HCG4	lymphocytes	minus
chr6	31144676	31146676	PSORS1C3	lymphocytes	minus
chr6	31549202	31551202	LTB	lymphocytes	minus
chr6	31559762	31561762	NCR3	lymphocytes	minus
chr6	32497006	32499006	HLA-DRB5	lymphocytes	minus
chr6	32783825	32785825	HLA-DOB	lymphocytes	minus
chr6	32820748	32822748	TAP1	lymphocytes	minus
chr6	32907847	32909847	HLA-DMB	lymphocytes	minus
chr6	33281164	33283164	TAPBP	lymphocytes	minus
chr6	35108187	35110187	TCP11	lymphocytes	minus
chr6	36806220	36808220	CPNE5	lymphocytes	minus
chr6	41005938	41007938	UNC5CL	lymphocytes	minus
chr6	41039188	41041188	C6orf130	lymphocytes	minus
chr6	41167925	41169925	TREML2	lymphocytes	minus
chr6	43275530	43277530	CRIP3	lymphocytes	minus
chr6	44224283	44226283	SLC35B2	lymphocytes	minus
chr6	74362737	74364737	SLC17A5	lymphocytes	minus
chr6	80656315	80658315	ELOVL4	lymphocytes	minus
chr6	82956448	82958448	IBTK	lymphocytes	minus
chr6	86302629	86304629	SNX14	lymphocytes	minus
chr6	105583221	105586049	BVES	lymphocytes	minus
chr6	109761374	109763374	PPIL6	lymphocytes	minus
chr6	110500207	110502207	WASF1	lymphocytes	minus
chr6	127662552	127665754	ECHDC1	lymphocytes	minus
chr6	130181416	130183416	TMEM244	lymphocytes	minus
chr6	134372789	134374789	SLC2A12	lymphocytes	minus
chr6	135299570	135301570	MIR3662	lymphocytes	minus
chr6	136609989	136611989	BCLAF1	lymphocytes	minus
chr6	138427660	138429660	PERP	lymphocytes	minus
chr6	146055991	146057991	EPM2A	lymphocytes	minus
chr6	147524750	147526750	LOC729178	lymphocytes	minus
chr6	152956986	152959534	SYNE1	lymphocytes	minus
chr6	157744253	157746253	TMEM242	lymphocytes	minus
chr6	159238340	159241456	EZR	lymphocytes	minus
chr6	161694107	161696107	AGPAT4	lymphocytes	minus
chr6	163833982	163835982	CAHM	lymphocytes	minus
chr6	166754991	166756991	SFT2D1	lymphocytes	minus
chr6	168226476	168228476	MLLT4-AS1	lymphocytes	minus
chr6	170123106	170125106	PHF10	lymphocytes	minus
chr7	993289	995289	ADAP1	lymphocytes	minus
chr7	1595066	1597066	TMEM184A	lymphocytes	minus
chr7	1882889	1884889	MIR4655	lymphocytes	minus
chr7	3082509	3084509	CARD11	lymphocytes	minus
chr7	20256013	20258013	MACC1	lymphocytes	minus
chr7	21984542	21986542	CDCA7L	lymphocytes	minus
chr7	25018760	25020760	OSBPL3	lymphocytes	minus
chr7	26239413	26241413	HNRNPA2B1	lymphocytes	minus
chr7	29723754	29725754	LOC646762	lymphocytes	minus
chr7	29724437	29726437	ZNRF2P2	lymphocytes	minus
chr7	30517393	30519393	NOD1	lymphocytes	minus
chr7	32930468	32932468	KBTBD2	lymphocytes	minus
chr7	43945231	43947231	URGCP	lymphocytes	minus
chr7	43945231	43947231	URGCP-MRPS24	lymphocytes	minus
chr7	44079222	44081222	RASA4P	lymphocytes	minus
chr7	44920399	44922399	MIR4657	lymphocytes	minus
chr7	45127493	45129493	NACAD	lymphocytes	minus
chr7	45150317	45152317	TBRG4	lymphocytes	minus
chr7	56173187	56175187	CHCHD2	lymphocytes	minus
chr7	76828150	76830150	FGL2	lymphocytes	minus
chr7	86848031	86850031	C7orf23	lymphocytes	minus
chr7	92776680	92778680	SAMD9L	lymphocytes	minus
chr7	97600638	97602638	MGC72080	lymphocytes	minus
chr7	97880468	97882468	TECPR1	lymphocytes	minus
chr7	99697380	99700427	MCM7	lymphocytes	minus
chr7	100025302	100027302	ZCWPW1	lymphocytes	minus
chr7	100075902	100077902	TSC22D4	lymphocytes	minus
chr7	100200661	100202661	LOC100129845	lymphocytes	minus
chr7	102788569	102790569	NAPEPLD	lymphocytes	minus
chr7	103628963	103630963	RELN	lymphocytes	minus
chr7	105220976	105222976	EFCAB10	lymphocytes	minus
chr7	107301243	107303243	LOC286002	lymphocytes	minus
chr7	112725393	112728833	GPR85	lymphocytes	minus
chr7	116593388	116595388	ST7-AS1	lymphocytes	minus
chr7	130790789	130794562	FLJ43663	lymphocytes	minus
chr7	137685847	137687847	CREB3L2	lymphocytes	minus
chr7	138481941	138483941	ATP6V0A4	lymphocytes	minus
chr7	141400953	141402953	KIAA1147	lymphocytes	minus
chr7	143058173	143060840	FAM131B	lymphocytes	minus
chr7	143104985	143106985	EPHA1	lymphocytes	minus
chr7	144532146	144534146	TPK1	lymphocytes	minus
chr7	148579601	148582441	EZH2	lymphocytes	minus
chr7	148786869	148788869	ZNF786	lymphocytes	minus
chr7	150019758	150021758	ACTR3C	lymphocytes	minus
chr7	150328736	150330736	GIMAP6	lymphocytes	minus
chr7	150779413	150781620	TMUB1	lymphocytes	minus
chr7	150863867	150865867	GBX1	lymphocytes	minus
chr7	150883478	150885919	ASB10	lymphocytes	minus
chr7	151106124	151108124	WDR86	lymphocytes	minus
chr7	151129725	151131725	MIR3907	lymphocytes	minus
chr7	156432348	156434348	C7orf13	lymphocytes	minus
chr7	156801129	156804347	MNX1	lymphocytes	minus
chr7	158324505	158326505	MIR595	lymphocytes	minus
chr8	8750131	8752131	MFHAS1	lymphocytes	minus
chr8	9007220	9010152	PPP1R3B	lymphocytes	minus
chr8	11323276	11325276	FAM167A	lymphocytes	minus
chr8	11724646	11726646	CTSB	lymphocytes	minus
chr8	12583813	12585813	MIR3926-1	lymphocytes	minus
chr8	12611992	12613992	LONRF1	lymphocytes	minus
chr8	17103387	17105387	CNOT7	lymphocytes	minus
chr8	21998448	22000448	REEP4	lymphocytes	minus
chr8	22498722	22500722	FLJ14107	lymphocytes	minus
chr8	27167834	27169834	TRIM35	lymphocytes	minus
chr8	27940388	27942388	C8orf80	lymphocytes	minus
chr8	29205322	29209267	DUSP4	lymphocytes	minus
chr8	42396068	42398068	SLC20A2	lymphocytes	minus
chr8	42622929	42624929	CHRNA6	lymphocytes	minus
chr8	52810735	52812735	PCMTD1	lymphocytes	minus
chr8	57122859	57124859	PLAG1	lymphocytes	minus
chr8	60030767	60032767	TOX	lymphocytes	minus
chr8	67873825	67875825	TCF24	lymphocytes	minus
chr8	68254912	68256912	ARFGEF1	lymphocytes	minus
chr8	71519694	71521694	TRAM1	lymphocytes	minus
chr8	94927347	94929347	MIR378D2	lymphocytes	minus
chr8	95448180	95450180	RAD54B	lymphocytes	minus
chr8	95448180	95450180	FSBP	lymphocytes	minus
chr8	103423917	103425917	UBR5	lymphocytes	minus
chr8	103665168	103668983	KLF10	lymphocytes	minus
chr8	119633184	119635184	SAMD12	lymphocytes	minus
chr8	125052023	125054023	FER1L6-AS1	lymphocytes	minus
chr8	125739730	125741730	MTSS1	lymphocytes	minus
chr8	126962441	126964441	LOC100130231	lymphocytes	minus
chr8	142237673	142239673	SLC45A4	lymphocytes	minus
chr9	28739	30739	WASH1	lymphocytes	minus
chr9	178075	180075	CBWD1	lymphocytes	minus
chr9	2621373	2623373	FLJ35024	lymphocytes	minus
chr9	5184618	5186618	INSL6	lymphocytes	minus
chr9	5436937	5438937	C9orf46	lymphocytes	minus
chr9	21030635	21032635	PTPLAD2	lymphocytes	minus
chr9	22008312	22010312	CDKN2B	lymphocytes	minus
chr9	33446631	33448631	AQP3	lymphocytes	minus
chr9	33510164	33512164	SUGT1P1	lymphocytes	minus
chr9	34627011	34629011	ARID3C	lymphocytes	minus
chr9	35095546	35097598	PIGO	lymphocytes	minus
chr9	35827744	35829744	C9orf128	lymphocytes	minus
chr9	38619360	38621360	ANKRD18A	lymphocytes	minus
chr9	40791112	40793112	ZNF658	lymphocytes	minus
chr9	69261593	69263593	CBWD6	lymphocytes	minus
chr9	70489171	70491171	CBWD5	lymphocytes	minus
chr9	70489177	70491177	CBWD3	lymphocytes	minus
chr9	72286275	72288275	APBA1	lymphocytes	minus
chr9	74979163	74981163	ZFAND5	lymphocytes	minus
chr9	86594184	86596569	HNRNPK	lymphocytes	minus
chr9	89561104	89563104	GAS1	lymphocytes	minus
chr9	94185144	94187144	NFIL3	lymphocytes	minus
chr9	94711444	94713444	ROR2	lymphocytes	minus
chr9	97400923	97403531	FBP1	lymphocytes	minus
chr9	99179669	99181669	ZNF367	lymphocytes	minus
chr9	100157973	100159973	LOC286359	lymphocytes	minus
chr9	111807578	111809578	MIR32	lymphocytes	minus
chr9	111881225	111883225	C9orf5	lymphocytes	minus
chr9	114246025	114248025	KIAA0368	lymphocytes	minus
chr9	114360711	114363135	PTGR1	lymphocytes	minus
chr9	115872957	115874957	LINC00256B	lymphocytes	minus
chr9	117443369	117445369	LOC100505478	lymphocytes	minus
chr9	125026143	125028143	RBM18	lymphocytes	minus
chr9	127702386	127704386	GOLGA1	lymphocytes	minus
chr9	132514344	132516344	PTGES	lymphocytes	minus
chr9	132804473	132806473	FNBP1	lymphocytes	minus
chr9	135544788	135546788	DDX31	lymphocytes	minus
chr9	138390761	138392761	C9orf116	lymphocytes	minus
chr9	139641980	139643980	LCN6	lymphocytes	minus
chr9	140008195	140010195	DPP7	lymphocytes	minus
chrX	15287293	15289589	ASB9	lymphocytes	minus
chrX	39185616	39187616	LOC286442	lymphocytes	minus
chrX	43740721	43742721	MAOB	lymphocytes	minus
chrX	44201923	44203923	EFHC2	lymphocytes	minus
chrX	47488369	47490704	CFP	lymphocytes	minus
chrX	48692960	48694960	PCSK1N	lymphocytes	minus
chrX	48813893	48816648	OTUD5	lymphocytes	minus
chrX	50556044	50558044	SHROOM4	lymphocytes	minus
chrX	54208714	54210714	FAM120C	lymphocytes	minus
chrX	55514631	55516631	USP51	lymphocytes	minus
chrX	57020988	57022988	SPIN3	lymphocytes	minus
chrX	57936067	57938067	ZXDA	lymphocytes	minus
chrX	68384365	68386365	PJA1	lymphocytes	minus
chrX	70473038	70476047	ZMYM3	lymphocytes	minus
chrX	70711604	70713604	INGX	lymphocytes	minus
chrX	71350751	71352751	RGAG4	lymphocytes	minus
chrX	71933029	71935029	PHKA1	lymphocytes	minus
chrX	72162589	72164589	LINC00246A	lymphocytes	minus
chrX	72162589	72164589	LINC00246B	lymphocytes	minus
chrX	74144287	74146287	KIAA2022	lymphocytes	minus
chrX	78622049	78624049	ITM2A	lymphocytes	minus
chrX	100640212	100642212	BTK	lymphocytes	minus
chrX	101770699	101772699	TMSB15A	lymphocytes	minus
chrX	102509121	102511121	TCEAL8	lymphocytes	minus
chrX	106242474	106244474	MORC4	lymphocytes	minus
chrX	129243475	129245688	ELF4	lymphocytes	minus
chrX	135862503	135864503	ARHGEF6	lymphocytes	minus
chrX	136112833	136114833	GPR101	lymphocytes	minus
chrX	140270310	140272310	LDOC1	lymphocytes	minus
chrX	148585884	148587884	IDS	lymphocytes	minus
chrX	153362188	153364188	MECP2	lymphocytes	minus
chrX	153639427	153641427	DNASE1L1	lymphocytes	minus
chrX	153774233	153776787	G6PD	lymphocytes	minus
chrX	154841622	154843622	TMLHE	lymphocytes	minus
chrY	15591550	15593550	UTY	lymphocytes	minus
chrY	21153705	21155705	CD24	lymphocytes	minus
chrY	21905825	21907825	KDM5D	lymphocytes	minus
chr1	1101484	1103484	MIR200B	lymphocytes	plus
chr1	1102243	1104243	MIR200A	lymphocytes	plus
chr1	1103385	1105385	MIR429	lymphocytes	plus
chr1	1369903	1371903	VWA1	lymphocytes	plus
chr1	6265189	6267189	RNF207	lymphocytes	plus
chr1	9004922	9006922	CA6	lymphocytes	plus
chr1	11723150	11725150	FBXO6	lymphocytes	plus
chr1	12226060	12228060	TNFRSF1B	lymphocytes	plus
chr1	12805163	12807163	C1orf158	lymphocytes	plus
chr1	16009827	16011827	PLEKHM2	lymphocytes	plus
chr1	16766167	16768167	NECAP2	lymphocytes	plus
chr1	19968723	19973260	NBL1	lymphocytes	plus
chr1	20511578	20513578	UBXN10	lymphocytes	plus
chr1	22350707	22353042	LINC00339	lymphocytes	plus
chr1	23952824	23954824	MDS2	lymphocytes	plus
chr1	24827841	24830387	RCAN3	lymphocytes	plus
chr1	26643411	26645411	CD52	lymphocytes	plus
chr1	26797902	26799902	HMGN2	lymphocytes	plus
chr1	27667483	27669483	SYTL1	lymphocytes	plus
chr1	28994240	28996240	GMEB1	lymphocytes	plus
chr1	32665202	32667202	CCDC28B	lymphocytes	plus
chr1	33282043	33284119	S100PBP	lymphocytes	plus
chr1	33721174	33723174	ZNF362	lymphocytes	plus
chr1	36395683	36397683	EIF2C3	lymphocytes	plus
chr1	39956318	39958318	BMP8A	lymphocytes	plus
chr1	40505255	40507255	CAP1	lymphocytes	plus
chr1	41219027	41221027	MIR30E	lymphocytes	plus
chr1	46712367	46714367	RAD54L	lymphocytes	plus
chr1	51433367	51436642	CDKN2C	lymphocytes	plus
chr1	53067043	53069043	GPX7	lymphocytes	plus
chr1	54358861	54360861	DIO1	lymphocytes	plus
chr1	55680081	55682081	LOC100507634	lymphocytes	plus
chr1	62207149	62209149	INADL	lymphocytes	plus
chr1	65729430	65731430	DNAJC6	lymphocytes	plus
chr1	67631169	67633169	IL23R	lymphocytes	plus
chr1	67772047	67774047	IL12RB2	lymphocytes	plus
chr1	89828436	89830436	GBP6	lymphocytes	plus
chr1	94311388	94313388	MIR760	lymphocytes	plus
chr1	95581894	95583894	TMEM56	lymphocytes	plus
chr1	95582479	95584479	TMEM56-RWDD3	lymphocytes	plus
chr1	100502789	100504789	HIAT1	lymphocytes	plus
chr1	101360632	101362634	SLC30A7	lymphocytes	plus
chr1	101701305	101703305	S1PR1	lymphocytes	plus
chr1	109655585	109657585	KIAA1324	lymphocytes	plus
chr1	110229418	110231418	GSTM1	lymphocytes	plus
chr1	112015604	112017604	C1orf162	lymphocytes	plus
chr1	116183574	116186250	VANGL1	lymphocytes	plus
chr1	117213371	117215371	MIR320B1	lymphocytes	plus
chr1	117296086	117298086	CD2	lymphocytes	plus
chr1	117451689	117453689	PTGFRN	lymphocytes	plus
chr1	118471372	118473372	WDR3	lymphocytes	plus
chr1	145437462	145439462	TXNIP	lymphocytes	plus
chr1	145476085	145478085	LIX1L	lymphocytes	plus
chr1	149857525	149859525	HIST2H2AC	lymphocytes	plus
chr1	151019259	151021259	C1orf56	lymphocytes	plus
chr1	153231179	153233179	LOR	lymphocytes	plus
chr1	153746768	153748768	SLC27A3	lymphocytes	plus
chr1	154191655	154194325	UBAP2L	lymphocytes	plus
chr1	155022762	155024762	ADAM15	lymphocytes	plus
chr1	155035213	155037213	EFNA4	lymphocytes	plus
chr1	155099349	155101349	EFNA1	lymphocytes	plus
chr1	155246374	155248374	HCN3	lymphocytes	plus
chr1	155828260	155830260	SYT11	lymphocytes	plus
chr1	156210951	156212951	BGLAP	lymphocytes	plus
chr1	156697263	156699263	RRNAD1	lymphocytes	plus
chr1	158900337	158902337	PYHIN1	lymphocytes	plus
chr1	158978682	158980682	IFI16	lymphocytes	plus
chr1	160174125	160176125	PEA15	lymphocytes	plus
chr1	167598474	167600474	RCSD1	lymphocytes	plus
chr1	168544711	168546711	XCL1	lymphocytes	plus
chr1	182583275	182585275	LOC284648	lymphocytes	plus
chr1	184355150	184357150	C1orf21	lymphocytes	plus
chr1	186797032	186799032	PLA2G4A	lymphocytes	plus
chr1	198125108	198127108	NEK7	lymphocytes	plus
chr1	200707686	200709686	CAMSAP2	lymphocytes	plus
chr1	203733284	203735284	LAX1	lymphocytes	plus
chr1	205196038	205199059	TMCC2	lymphocytes	plus
[truncated: 1,188 more rows]
